# Supplementary material for: Cascade C–N bond cleavage of amides/intramolecular amination reactions: an atom economical way to α-cabolin-4-ones
Source: Royal Society of Chemistry journal article supplement (doi:10.1039/d0qo01257b), 2020-11-28

## Supporting Information

### **Cascade C-N Bond Cleavage of Amides / Intramolecular Amination**

#### **Reactions: An Atom Economical Way to $\alpha$ -Cabolin-4-ones**

Ye Wang,<sup>†§</sup> Zhong Zheng,<sup>†§</sup> Yang Yuan,<sup>†</sup> Mengdan Wang,<sup>†</sup> Zixia Guo,<sup>†</sup> Yuan-Ye Jiang,<sup>\*,‡</sup> Li-Ping Bai,<sup>\*,¶</sup> and Yanzhong Li<sup>\*,†</sup>

<sup>†</sup> School of Chemistry and Molecular Engineering East China Normal University, 500 Dongchuan Road 200241, China

<sup>‡</sup> School of Chemistry and Chemical Engineering, Qufu Normal University, Qufu, Shandong, 273165, China

<sup>¶</sup> State Key Laboratory of Quality Research in Chinese Medicine, and Macau Institute for Applied Research in Medicine and Health, Macau University of Science and Technology, 999708, Taipa, Macau

### **Table of Contents**

|                                                                                     |            |
|-------------------------------------------------------------------------------------|------------|
| <b>1. General Methods. ....</b>                                                     | <b>S1</b>  |
| <b>2. Preparation and Characterization of <math>\alpha</math>-Cabolinone 4.....</b> | <b>S1</b>  |
| <b>3. Control experiments.....</b>                                                  | <b>S12</b> |
| <b>4. Transformations of 4a.....</b>                                                | <b>S14</b> |
| <b>5. Computational Methods.....</b>                                                | <b>S17</b> |
| <b>6. Copies of Spectra of New Products .....</b>                                   | <b>S29</b> |
| <b>7. X-ray Crystallography of Compounds 4a, 5a, 6 .....</b>                        | <b>S64</b> |

## 1. General Methods

All reactions were carried out under air. Toluene was prepared by distillation from sodium using benzophenone as indicator. Unless noted, all commercial reagents were used without further purification. Reactions were monitored by thin layer chromatography. Purification of reaction products was carried out by flash chromatography on silica gel (300~400 mesh).  $^1\text{H}$  NMR spectra were recorded at 400 MHz or 600 MHz,  $^{13}\text{C}$  NMR spectra were recorded at 100 MHz or 150 MHz, and in  $\text{CDCl}_3$  or  $\text{d}^6\text{-DMSO}$  (containing 0.03% TMS) solutions.  $^1\text{H}$  NMR spectra was recorded with tetramethylsilane ( $\delta = 0.00$  ppm) as internal reference;  $^{13}\text{C}$  NMR spectra was recorded with  $\text{CDCl}_3$  ( $\delta = 77.00$  ppm) or  $\text{d}^6\text{-DMSO}$  ( $\delta = 39.52$  ppm) as internal reference. High-resolution mass spectra were performed on a mass spectrometer with a TOF (for EI or ESI) or FT-ICR (for MALDI) analyzer. Single crystal X-ray diffraction data was collected in Bruker SMARTAPEX diffractometers.

## 2. Preparation and Characterization of $\alpha$ -Cabolinone 4

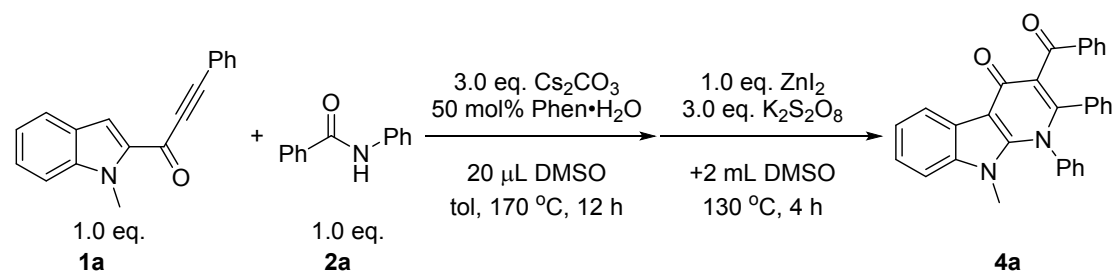

In a dried sealed tube ynone **1a** (0.2 mmol, 51.9 mg), *N*-phenylbenzamide **2a** (0.2 mmol, 39.4 mg), 1,10-phenanthroline hydrate (0.1 mmol, 19.8 mg), cesium carbonate (0.6 mmol, 195.6 mg), toluene (2 mL) and dimethyl sulfoxide (20  $\mu\text{L}$ ) were added, and the mixture was heated at 170  $^\circ\text{C}$  for 12 h. After the reaction was complete as monitored by thin-layer chromatography, a portion of dimethyl sulfoxide (2 mL) was added to the reaction mixture, then vigorously stir until all the precipitates were dissolved. Zinc iodide (0.2 mmol, 63.8 mg), potassium persulfate (0.6 mmol, 162.2 mg) were added, and the mixture was heated at 130  $^\circ\text{C}$  for 4 h. After the reaction was complete as monitored by thin-layer chromatography, the reaction mixture was then quenched by water (20 mL), a portion of ethyl acetate (20 mL) was added and the combined organic layer was washed with water (50 mL), saturated sodium thiosulfate solution (50 mL), brine (50 mL). Combined aqueous phase was extracted with dichloromethane until all dissolvable precipitates were dissolved. The combined organic phase was dried over with anhydrous  $\text{Na}_2\text{SO}_4$ , filtered, and concentrated under reduced pressure, Purification by chromatography on silica gel (petroleum ether / ethyl acetate = 1/1) afforded desired compound **4a**.

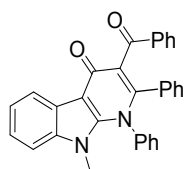

4a

**3-benzoyl-9-methyl-1,2-diphenyl-1,9-dihydro-4H-pyrido[2,3-b]indol-4-one (4a)**

Light yellow solid, 78 % yield (71 mg); mp 273-275 °C.

<sup>1</sup>H NMR (CDCl<sub>3</sub>, 400 MHz) δ 3.00 (s, 3H), 6.92-7.05 (m, 5H), 7.18-7.25 (m, 3H), 7.28-7.38 (m, 7H), 7.39-7.47 (m, 1H), 7.85 (d, *J* = 8.0 Hz, 2H), 8.56 (d, *J* = 6.0 Hz, 1H).

<sup>13</sup>C NMR (CDCl<sub>3</sub>, 100 MHz) δ 31.66, 108.60, 108.75, 122.35, 122.55, 122.70, 124.36, 127.12, 127.68, 128.46, 128.82, 129.42, 129.58, 129.96, 130.56, 130.81, 131.80, 132.98, 137.40, 138.13, 138.25, 144.21, 146.59, 173.50, 196.06.

HRMS (ESI) calcd for C<sub>31</sub>H<sub>23</sub>N<sub>2</sub>O<sub>2</sub>, [M+H]<sup>+</sup>: 455.1754, found: 455.1761.

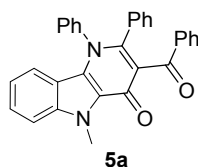

5a

**3-benzoyl-5-methyl-1,2-diphenyl-1,5-dihydro-4H-pyrido[3,2-b]indol-4-one (5a)**

White solid, 34% yield (31 mg); mp 277-279 °C.

<sup>1</sup>H NMR (CDCl<sub>3</sub>, 400 MHz) δ 4.41 (s, 3H), 6.02 (d, *J* = 8.0 Hz, 1H), 6.80-6.89 (m, 1H), 6.94-7.15 (m, 5H), 7.26-7.31 (m, 2H), 7.32-7.52 (m, 8H), 7.89 (d, *J* = 7.6 Hz, 2H).

<sup>13</sup>C NMR (CDCl<sub>3</sub>, 100 MHz) δ 31.12, 110.12, 116.23, 119.85, 121.29, 126.71, 127.00, 127.13, 127.71, 128.55, 128.85, 128.94, 129.47, 129.63, 129.75, 129.81, 130.78, 132.01, 133.04, 138.45, 139.71, 139.84, 146.73, 169.23, 196.52.

HRMS (ESI) calcd for C<sub>31</sub>H<sub>23</sub>N<sub>2</sub>O<sub>2</sub>, [M+H]<sup>+</sup>: 455.1754, found: 455.1763.

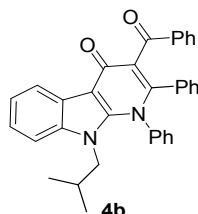

4b

**3-benzoyl-9-isobutyl-1,2-diphenyl-1,9-dihydro-4H-pyrido[2,3-b]indol-4-one (4b)**

Brown solid, 47 % yield (47 mg); mp 257-259 °C.

<sup>1</sup>H NMR (CDCl<sub>3</sub>, 400 MHz) δ 0.52 (d, *J* = 6.8 Hz, 6H), 1.75-1.87 (m, 1H), 3.17 (d, *J* = 7.6 Hz, 2H), 6.92-7.07 (m, 5H), 7.18 (d, *J* = 7.2 Hz, 2H), 7.27-7.39 (m, 8H), 7.40-7.47 (m, 1H), 7.85 (d, *J* = 7.6 Hz, 2H), 8.57 (d, *J* = 7.6 Hz, 1H).

<sup>13</sup>C NMR (CDCl<sub>3</sub>, 100 MHz) δ 19.53, 29.14, 50.67, 109.42, 110.07, 122.30, 122.59, 122.78,

124.20, 127.36, 127.63, 128.44, 128.83, 129.41, 129.58, 129.72, 130.01, 130.76, 131.85, 133.04, 137.47, 138.10, 138.13, 144.47, 147.00, 173.72, 196.17.

HRMS (ESI) calcd for  $C_{34}H_{29}N_2O_2$ ,  $[M+H]^+$ : 497.2224, found: 497.2222.

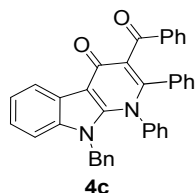

### 3-benzoyl-9-benzyl-1,2-diphenyl-1,9-dihydro-4H-pyrido[2,3-b]indol-4-one (4c)

Light yellow solid, 65 % yield (69 mg); mp 274-276 °C.

$^1H$  NMR ( $CDCl_3$ , 400 MHz)  $\delta$  4.73 (s, 2H), 6.48 (d,  $J = 7.2$  Hz, 2H), 6.84-6.97 (m, 7H), 6.97-7.04 (m, 2H), 7.08-7.21 (m, 5H), 7.27-7.39 (m, 4H), 7.40-7.47 (m, 1H), 7.86 (d,  $J = 8.0$  Hz, 2H), 8.64 (d,  $J = 7.6$  Hz, 1H).

$^{13}C$  NMR ( $CDCl_3$ , 100 MHz)  $\delta$  47.50, 109.25, 109.38, 122.73, 122.79, 122.91, 124.76, 125.21, 127.32, 127.53, 128.45, 128.68, 128.74, 129.17, 129.44, 129.83, 130.21, 130.78, 131.67, 133.02, 136.26, 137.29, 137.40, 138.19, 143.82, 146.95, 173.62, 196.09.

HRMS (ESI) calcd for  $C_{37}H_{26}N_2NaO_2$ ,  $[M+Na]^+$ : 553.1886, found: 553.1890.

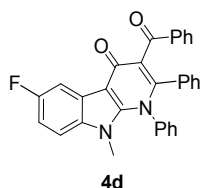

### 3-benzoyl-6-fluoro-9-methyl-1,2-diphenyl-1,9-dihydro-4H-pyrido[2,3-b]indol-4-one (4d)

Brown solid, 73 % yield (69 mg); mp 289-291 °C.

$^1H$  NMR ( $CDCl_3$ , 400 MHz)  $\delta$  2.98 (s, 3H), 6.90-7.12 (m, 7H), 7.21-7.39 (m, 7H), 7.39-7.48 (m, 1H), 7.83 (d,  $J = 8.0$  Hz, 2H), 8.14 (dd,  $J_1 = 9.2$  Hz,  $J_2 = 2.4$  Hz, 1H).

$^{13}C$  NMR ( $CDCl_3$ , 100 MHz)  $\delta$  31.86, 107.62 (d,  $J = 25.0$  Hz), 108.21 (d,  $J = 3.9$  Hz), 109.74 (d,  $J = 9.5$  Hz), 111.87 (d,  $J = 25.9$  Hz), 123.10 (d,  $J = 11.4$  Hz), 126.84, 127.69, 128.46, 128.86, 129.36, 129.60, 130.04, 130.56, 130.79, 131.64, 133.02, 133.68, 137.80, 138.16, 144.71, 146.94, 159.16 (d,  $J = 236.7$  Hz), 173.34, 195.87.

HRMS (ESI) calcd for  $C_{30}H_{21}FN_2NaO_2$ ,  $[M+Na]^+$ : 495.1479, found: 495.1479.

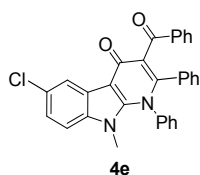

### 3-benzoyl-6-chloro-9-methyl-1,2-diphenyl-1,9-dihydro-4H-pyrido[2,3-b]indol-4-one (4e)

White solid, 62% yield (61 mg); mp 321-323 °C.

$^1\text{H}$  NMR ( $\text{CDCl}_3$ , 400 MHz)  $\delta$  2.97 (s, 3H), 6.93-7.06 (m, 6H), 7.17 (dd,  $J_1 = 8.8$  Hz,  $J_2 = 2.0$  Hz, 1H), 7.25-7.36 (m, 7H), 7.40-7.47 (m, 1H), 7.83 (d,  $J = 7.6$  Hz, 2H), 8.47 (d,  $J = 2.4$  Hz, 1H).

$^{13}\text{C}$  NMR ( $\text{CDCl}_3$ , 100 MHz)  $\delta$  31.86, 107.74, 109.99, 121.53, 123.56, 124.20, 126.92, 127.60, 127.70, 128.46, 128.86, 129.35, 129.59, 130.08, 130.61, 130.77, 131.56, 133.02, 135.70, 137.65, 138.14, 144.46, 147.10, 173.27, 195.84.

HRMS (ESI) calcd for  $\text{C}_{31}\text{H}_{21}\text{ClN}_2\text{NaO}_2$ ,  $[\text{M}+\text{Na}]^+$ : 511.1184, found 511.1187.

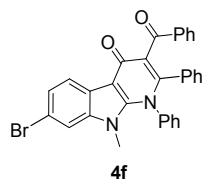

### 3-benzoyl-7-bromo-9-methyl-1,2-diphenyl-1,9-dihydro-4H-pyrido[2,3-b]indol-4-one (4f)

Yellow solid, 68% yield (68 mg); mp 349-351 °C.

$^1\text{H}$  NMR ( $\text{DMSO}-d_6$ , 400 MHz)  $\delta$  2.97 (s, 3H), 6.96-7.05 (m, 3H), 7.15 (d,  $J = 7.2$  Hz, 2H), 7.32-7.39 (m, 3H), 7.40-7.47 (m, 3H), 7.52-7.59 (m, 1H), 7.62-7.69 (m, 2H), 7.81-7.89 (m, 3H), 8.18 (d,  $J = 8.4$  Hz, 1H).

$^{13}\text{C}$  NMR ( $\text{DMSO}-d_6$ , 100 MHz)  $\delta$  31.95, 107.13, 113.31, 116.74, 121.35, 122.44, 125.00, 125.98, 127.51, 128.86, 128.95, 129.43, 130.34, 130.99, 131.45, 131.88, 133.57, 137.60, 137.89, 138.50, 144.60, 146.82, 172.66, 195.89.

HRMS (ESI) calcd for  $\text{C}_{31}\text{H}_{21}\text{BrN}_2\text{NaO}_2$ ,  $[\text{M}+\text{Na}]^+$ : 555.0679, found: 555.0684.

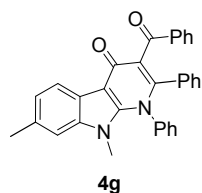

### 3-benzoyl-7,9-dimethyl-1,2-diphenyl-1,9-dihydro-4H-pyrido[2,3-b]indol-4-one (4g)

Light yellow solid, 87% yield (82 mg); mp 179-181 °C.

$^1\text{H}$  NMR ( $\text{CDCl}_3$ , 400 MHz)  $\delta$  2.50 (s, 3H), 2.98 (s, 3H), 6.89-7.08 (m, 6H), 7.16 (d,  $J = 8.0$  Hz, 1H), 7.19-7.26 (m, 2H), 7.28-7.37 (m, 5H), 7.39-7.49 (m, 1H), 7.85 (d,  $J = 8.0$  Hz, 2H), 8.42 (d,  $J = 8.0$  Hz, 1H).

$^{13}\text{C}$  NMR ( $\text{CDCl}_3$ , 100 MHz)  $\delta$  21.92, 31.56, 108.74, 108.99, 120.33, 122.28, 123.86, 127.05, 127.66, 128.45, 128.79, 129.42, 129.56, 129.92, 130.53, 130.84, 131.86, 132.94, 134.54, 137.82, 138.20, 138.29, 144.07, 146.33, 173.32, 196.18.

HRMS (ESI) calcd for  $\text{C}_{32}\text{H}_{24}\text{N}_2\text{NaO}_2$ ,  $[\text{M}+\text{Na}]^+$ : 491.1730, found 491.1730.

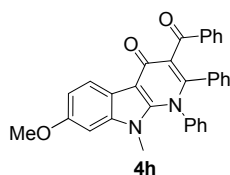

**3-benzoyl-6-methoxy-9-methyl-1,2-diphenyl-1,9-dihydro-4H-pyrido[2,3-b]indol-4-one (4h)**

Brown solid, 61% yield (59 mg); mp 286-288 °C.

<sup>1</sup>H NMR (CDCl<sub>3</sub>, 400 MHz) δ 2.94 (s, 3H), 3.87 (s, 3H), 6.88-7.04 (m, 6H), 7.07 (d, *J* = 8.8 Hz, 1H), 7.20-7.36 (m, 7H), 7.38-7.47 (m, 1H), 7.85 (d, *J* = 7.6 Hz, 2H), 8.08 (s, 1H).

<sup>13</sup>C NMR (CDCl<sub>3</sub>, 100 MHz) δ 31.64, 55.65, 103.90, 108.47, 109.67, 114.07, 123.10, 126.58, 127.61, 128.42, 128.75, 129.30, 129.49, 129.90, 130.53, 130.74, 131.72, 131.89, 132.93, 137.90, 138.24, 144.14, 146.54, 155.93, 173.52, 196.03.

HRMS (ESI) calcd for C<sub>32</sub>H<sub>24</sub>N<sub>2</sub>NaO<sub>3</sub>, [M+Na]<sup>+</sup>: 507.1679, found 507.1676.

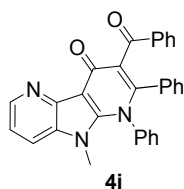

**3-benzoyl-9-methyl-1,2-diphenyl-1,9-dihydro-4H-pyrrolo[2,3-b:5,4-b']dipyridin-4-one (4i)**

White solid, 59% yield (54 mg); mp 275-277 °C.

<sup>1</sup>H NMR (CDCl<sub>3</sub>, 400 MHz) δ 3.17 (s, 3H), 6.91-7.08 (m, 5H), 7.22-7.38 (m, 8H), 7.40-7.48 (m, 1H), 7.84 (d, *J* = 7.6 Hz, 2H), 8.37 (d, *J* = 4.4 Hz, 1H), 8.72 (d, *J* = 7.6 Hz, 1H).

<sup>13</sup>C NMR (CDCl<sub>3</sub>, 100 MHz) δ 29.88, 106.37, 115.82, 118.52, 127.36, 127.72, 128.49, 128.96, 129.35, 129.52, 130.21, 130.24, 130.66, 130.73, 131.48, 133.10, 137.62, 138.07, 144.25, 144.40, 147.13, 148.51, 173.38, 195.62.

HRMS (ESI) calcd for C<sub>30</sub>H<sub>21</sub>N<sub>3</sub>NaO<sub>2</sub>, [M+Na]<sup>+</sup>: 478.1526, found: 478.1527.

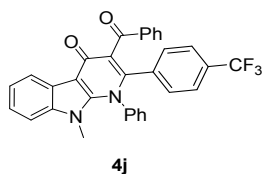

**3-benzoyl-9-methyl-1-phenyl-2-(4-(trifluoromethyl)phenyl)-1,9-dihydro-4H-pyrido[2,3-b]indol-4-one (4j)**

White solid, 76% yield (80 mg); mp 289-291 °C.

<sup>1</sup>H NMR (CDCl<sub>3</sub>, 400 MHz) δ 2.94 (s, 3H), 7.08 (d, *J* = 4.4 Hz, 1H), 7.13-7.38 (m, 13H), 7.40-7.49 (m, 1H), 7.84 (d, *J* = 8.0 Hz, 2H), 8.46-8.61 (m, 1H).

<sup>13</sup>C NMR (CDCl<sub>3</sub>, 100 MHz) δ 31.61, 108.51, 108.83, 122.24, 122.27, 122.47, 123.59 (q, *J* = 272.6 Hz), 124.38, 124.63 (q, *J* = 3.9 Hz), 127.06, 128.59, 129.33, 129.76, 130.31, 130.52, 130.65

(q,  $J = 32.6$  Hz), 131.35, 133.28, 135.54, 137.31, 137.60, 138.03, 143.95, 145.10, 173.12, 195.97.

HRMS (ESI) calcd for  $C_{32}H_{21}F_3N_2NaO_2$ ,  $[M+Na]^+$ : 545.1447, found: 545.1448.

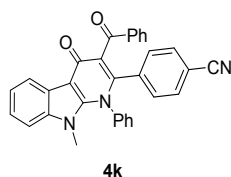

**4-(3-benzoyl-9-methyl-4-oxo-1-phenyl-4,9-dihydro-1H-pyrido[2,3-b]indol-2-yl) benzonitrile (4k)**

Light yellow solid, 57% yield (55 mg); mp 302-304 °C.

$^1H$  NMR ( $CDCl_3$ , 400 MHz)  $\delta$  2.93 (s, 3H), 7.02 (d,  $J = 7.6$  Hz, 1H), 7.17 (d,  $J = 8.0$  Hz, 2H), 7.20-7.40 (m, 11H), 7.43-7.51 (m, 1H), 7.82 (d,  $J = 8.0$  Hz, 2H), 8.50 (d,  $J = 7.2$  Hz, 1H).

$^{13}C$  NMR ( $CDCl_3$ , 100 MHz)  $\delta$  31.61, 108.52, 108.86, 112.64, 118.06, 122.20, 122.27, 122.41, 124.43, 126.98, 128.68, 129.34, 129.85, 130.47, 130.58, 131.44, 131.72, 133.44, 136.58, 137.31, 137.51, 137.93, 143.85, 144.61, 172.95, 195.84.

HRMS (ESI) calcd for  $C_{32}H_{21}N_3NaO_2$ ,  $[M+Na]^+$ : 502.1526, found: 502.1532.

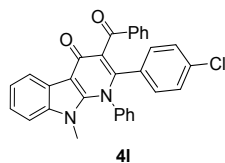

**3-benzoyl-2-(4-chlorophenyl)-9-methyl-1-phenyl-1,9-dihydro-4H-pyrido[2,3-b]indol-4-one (4l)**

Light yellow solid, 76% yield (74 mg); mp 268-269 °C.

$^1H$  NMR ( $CDCl_3$ , 400 MHz)  $\delta$  2.97 (s, 3H), 6.96 (s, 4H), 7.10-7.18 (m, 1H), 7.21-7.28 (m, 2H), 7.28-7.40 (m, 7H), 7.42-7.49 (m, 1H), 7.85 (d,  $J = 7.6$  Hz, 2H), 8.48-8.57 (m, 1H).

$^{13}C$  NMR ( $CDCl_3$ , 100 MHz)  $\delta$  31.63, 108.60, 108.80, 122.37, 122.43, 122.55, 124.44, 127.23, 128.08, 128.60, 129.41, 129.78, 130.24, 130.28, 130.52, 132.15, 133.24, 135.09, 137.38, 137.86, 138.06, 144.11, 145.39, 173.29, 196.01.

HRMS (ESI) calcd for  $C_{31}H_{21}ClN_2NaO_2$ ,  $[M+Na]^+$ : 511.1184, found 511.1184.

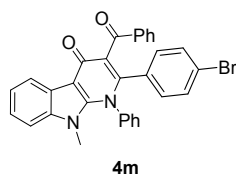

**3-benzoyl-2-(4-bromophenyl)-9-methyl-1-phenyl-1,9-dihydro-4H-pyrido[2,3-b]indol-4-one (4m)**

Light yellow solid, 71% yield (76 mg); mp 292-294 °C.

<sup>1</sup>H NMR (DMSO-*d*<sup>6</sup>, 400 MHz) δ 2.99 (s, 3H), 7.14 (d, *J* = 8.4 Hz, 2H), 7.21-7.32 (m, 3H), 7.34-7.49 (m, 6H), 7.50-7.61 (m, 2H), 7.63-7.72 (m, 2H), 7.87 (d, *J* = 8.0 Hz, 2H), 8.27 (d, *J* = 8.0 Hz, 1H).

<sup>13</sup>C NMR (DMSO-*d*<sup>6</sup>, 100 MHz) δ 31.62, 107.52, 110.16, 120.98, 122.09, 122.24, 122.54, 124.28, 125.96, 128.88, 129.42, 129.57, 130.43, 130.58, 131.39, 133.08, 133.60, 137.43, 137.71, 137.95, 144.26, 145.30, 172.61, 196.14.

HRMS (ESI) calcd for C<sub>31</sub>H<sub>21</sub>BrN<sub>2</sub>NaO<sub>2</sub>, [M+Na]<sup>+</sup>: 555.0679, found: 555.0686.

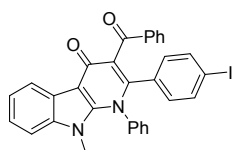

4n

**3-benzoyl-2-(4-iodophenyl)-9-methyl-1-phenyl-1,9-dihydro-4H-pyrido[2,3-b]indol-4-one(4n)**

Light yellow solid, 59% yield (64 mg); mp 311-313 °C.

<sup>1</sup>H NMR (CDCl<sub>3</sub>, 500 MHz) δ 2.97 (s, 3H), 6.76 (d, *J* = 5.0 Hz, 2H), 7.15 (d, *J* = 10.0 Hz, 1H), 7.22-7.25 (m, 2H), 7.30-7.37 (m, 9H), 7.43-7.48 (m, 1H), 7.84 (d, *J* = 10.0 Hz, 2H), 8.51-8.54 (m, 1H).

<sup>13</sup>C NMR (CDCl<sub>3</sub>, 125 MHz) δ 31.84, 95.27, 108.50, 108.64, 122.19, 122.28, 122.38, 124.24, 126.96, 128.37, 129.19, 129.57, 130.02, 130.27, 131.14, 132.16, 132.98, 136.68, 137.11, 137.62, 137.83, 143.83, 145.19, 172.85, 195.41.

HRMS (ESI) calcd for C<sub>31</sub>H<sub>21</sub>IN<sub>2</sub>NaO<sub>2</sub>, [M+Na]<sup>+</sup>: 603.0540, found 603.0533.

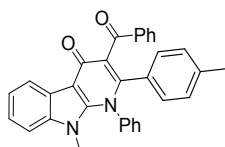

4o

**3-benzoyl-9-methyl-1-phenyl-2-(p-tolyl)-1,9-dihydro-4H-pyrido[2,3-b]indol-4-one (4o)**

Light yellow solid, 68% yield (64 mg); mp 289-291 °C.

<sup>1</sup>H NMR (CDCl<sub>3</sub>, 400 MHz) δ 2.10 (s, 3H), 2.98 (s, 3H), 6.76 (d, *J* = 8.0 Hz, 2H), 6.88 (d, *J* = 8.0 Hz, 2H), 7.19 (d, *J* = 7.6 Hz, 1H), 7.22-7.26 (m, 2H), 7.27-7.38 (m, 7H), 7.40-7.48 (m, 1H), 7.86 (d, *J* = 8.0 Hz, 2H), 8.54 (d, *J* = 7.6 Hz, 1H).

<sup>13</sup>C NMR (CDCl<sub>3</sub>, 100 MHz) δ 20.85, 31.63, 108.54, 108.74, 122.29, 122.48, 122.67, 124.31, 127.08, 128.40, 128.43, 128.77, 129.44, 129.54, 129.90, 130.54, 130.59, 132.93, 137.40, 138.16, 138.26, 138.73, 144.26, 146.85, 173.55, 196.17.

HRMS (ESI) calcd for C<sub>32</sub>H<sub>24</sub>N<sub>2</sub>NaO<sub>2</sub>, [M+Na]<sup>+</sup>: 491.1730, found 491.1724.



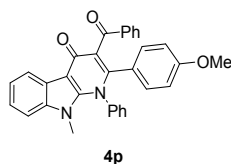

**3-benzoyl-2-(4-methoxyphenyl)-9-methyl-1-phenyl-1,9-dihydro-4H-pyrido[2,3-b]indol-4-one (4p)**

Light yellow solid, 80% yield (78 mg); mp 294-296 °C.

<sup>1</sup>H NMR (CDCl<sub>3</sub>, 400 MHz) δ 2.97 (s, 3H), 3.58 (s, 3H), 6.47 (d, *J* = 8.0 Hz, 2H), 6.90 (d, *J* = 8.4 Hz, 2H), 7.11-7.38 (m, 10H), 7.39-7.49 (m, 1H), 7.85 (d, *J* = 7.6 Hz, 2H), 8.46-8.61 (m, 1H).

<sup>13</sup>C NMR (CDCl<sub>3</sub>, 100 MHz) δ 31.65, 54.85, 108.58, 108.72, 113.10, 122.32, 122.53, 122.73, 123.97, 124.31, 127.38, 128.47, 129.44, 129.61, 129.91, 130.57, 132.15, 132.95, 137.43, 138.29, 144.34, 146.56, 159.70, 173.57, 196.17.

HRMS (ESI) calcd for C<sub>32</sub>H<sub>24</sub>N<sub>2</sub>NaO<sub>3</sub>, [M+Na]<sup>+</sup>: 507.1679, found 507.1672.

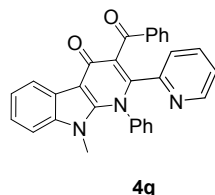

**3-benzoyl-9-methyl-1-phenyl-2-(pyridin-2-yl)-1,9-dihydro-4H-pyrido[2,3-b]indol-4-one (4q)**

Yellow solid, 52% yield (47 mg); mp 277-279 °C.

<sup>1</sup>H NMR (CDCl<sub>3</sub>, 400 MHz) δ 3.01 (s, 3H), 6.92 (dd, *J*<sub>1</sub> = 7.6 Hz, *J*<sub>2</sub> = 4.8 Hz, 1H), 7.21 (d, *J* = 7.6 Hz, 2H), 7.27-7.47 (m, 11H), 7.88 (d, *J* = 7.6 Hz, 2H), 8.23 (d, *J* = 4.8 Hz, 1H), 8.54 (d, *J* = 7.6 Hz, 1H).

<sup>13</sup>C NMR (CDCl<sub>3</sub>, 100 MHz) δ 31.59, 108.79, 108.87, 122.34, 122.53, 122.67, 123.26, 124.40, 126.93, 127.26, 128.47, 129.42, 129.55, 130.02, 130.62, 133.02, 135.86, 137.43, 138.00, 138.12, 144.17, 145.52, 149.03, 151.16, 173.47, 196.18.

HRMS (ESI) calcd for C<sub>30</sub>H<sub>21</sub>N<sub>3</sub>NaO<sub>2</sub>, [M+Na]<sup>+</sup>: 478.1526, found 478.1525.

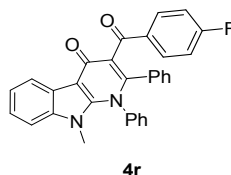

**3-(4-fluorobenzoyl)-9-methyl-1,2-diphenyl-1,9-dihydro-4H-pyrido[2,3-b]indol-4-one (4r)**

Light yellow solid, 84% yield (80 mg); mp 290-292 °C.

<sup>1</sup>H NMR (CDCl<sub>3</sub>, 400 MHz) δ 2.98 (s, 3H), 6.89-7.07 (m, 7H), 7.18 (d, *J* = 8.0 Hz, 1H), 7.21-7.28 (m, 2H), 7.28-7.39 (m, 5H), 7.87 (dd, *J*<sub>1</sub> = 8.4 Hz, *J*<sub>2</sub> = 5.6 Hz, 2H), 8.53 (d, *J* = 7.2 Hz, 1H).

<sup>13</sup>C NMR (CDCl<sub>3</sub>, 100 MHz) δ 31.64, 108.58, 108.82, 115.51 (d, *J* = 22.0 Hz), 122.35, 122.39,

122.56, 124.44, 126.66, 127.72, 128.90, 129.58, 130.03, 130.52, 130.73, 131.70, 132.03 (d,  $J = 9.4$  Hz), 134.72 (d,  $J = 2.9$  Hz), 137.42, 137.95, 144.16, 146.73, 165.91 (d,  $J = 253.6$  Hz), 173.35, 194.48.

HRMS (ESI) calcd for  $C_{31}H_{21}FN_2NaO_2$ ,  $[M+Na]^+$ : 495.1479, found 495.1482.

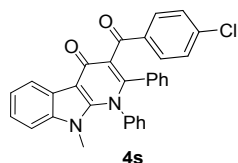

### 3-(4-chlorobenzoyl)-9-methyl-1,2-diphenyl-1,9-dihydro-4H-pyrido[2,3-b]indol-4-one (4s)

Light yellow solid, 86% yield (84 mg); mp 271-273 °C.

$^1H$  NMR ( $CDCl_3$ , 400 MHz)  $\delta$  2.98 (s, 3H), 6.94-7.08 (m, 5H), 7.17 (d,  $J = 7.6$  Hz, 1H), 7.21-7.39 (m, 9H), 7.78 (d,  $J = 8.4$  Hz, 2H), 8.53 (dd,  $J_1 = 5.6$  Hz,  $J_2 = 2.8$  Hz, 1H).

$^{13}C$  NMR ( $CDCl_3$ , 100 MHz)  $\delta$  31.64, 108.59, 108.82, 122.35, 122.40, 122.56, 124.43, 126.53, 127.76, 128.81, 128.93, 129.59, 130.03, 130.53, 130.71, 130.78, 131.68, 136.69, 137.41, 137.95, 139.28, 144.13, 146.90, 173.34, 194.88.

HRMS (ESI) calcd for  $C_{31}H_{21}ClN_2NaO_2$ ,  $[M+Na]^+$ : 511.1184, found 511.1188.

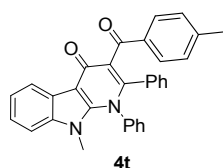

### 9-methyl-3-(4-methylbenzoyl)-1,2-diphenyl-1,9-dihydro-4H-pyrido[2,3-b]indol-4-one (4t)

Light yellow solid, 79% yield (74 mg); mp 264-266 °C.

$^1H$  NMR ( $CDCl_3$ , 400 MHz)  $\delta$  2.31 (s, 3H), 2.96 (s, 3H), 6.90-7.04 (m, 5H), 7.09 (d,  $J = 8.0$  Hz, 2H), 7.13-7.19 (m, 1H), 7.20-7.35 (m, 7H), 7.74 (d,  $J = 8.0$  Hz, 2H), 8.54 (dd,  $J_1 = 5.6$  Hz,  $J_2 = 2.4$  Hz, 1H).

$^{13}C$  NMR ( $CDCl_3$ , 100 MHz)  $\delta$  21.31, 31.58, 108.47, 108.75, 122.18, 122.35, 122.60, 124.25, 127.08, 127.59, 128.69, 129.15, 129.49, 129.52, 129.89, 130.51, 130.75, 131.79, 135.79, 137.36, 138.00, 143.72, 144.15, 146.47, 173.45, 195.58.

HRMS (ESI) calcd for  $C_{32}H_{24}N_2NaO_2$ ,  $[M+Na]^+$ : 491.1730, found 491.1728.

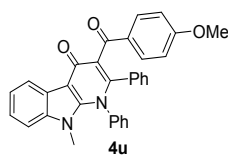

### 3-(4-methoxybenzoyl)-9-methyl-1,2-diphenyl-1,9-dihydro-4H-pyrido[2,3-b]indol-4-one (4u)

Dark yellow solid, 47% yield (46 mg); mp 268-270 °C.

$^1\text{H}$  NMR ( $\text{CDCl}_3$ , 400 MHz)  $\delta$  3.00 (s, 3H), 3.79 (s, 3H), 6.80 (d,  $J = 8.4$  Hz, 2H), 6.90-7.10 (m, 5H), 7.16-7.26 (m, 3H), 7.28-7.40 (m, 5H), 7.83 (d,  $J = 8.8$  Hz, 2H), 8.56 (d,  $J = 7.2$  Hz, 1H).

$^{13}\text{C}$  NMR ( $\text{CDCl}_3$ , 100 MHz)  $\delta$  31.64, 55.22, 108.58, 108.73, 113.67, 122.34, 122.54, 122.69, 124.35, 127.20, 127.66, 128.77, 129.55, 129.93, 130.55, 130.78, 131.45, 131.86, 131.89, 137.41, 138.15, 144.22, 146.37, 163.68, 173.53, 194.44.

HRMS (ESI) calcd for  $\text{C}_{32}\text{H}_{24}\text{N}_2\text{NaO}_3$ ,  $[\text{M}+\text{Na}]^+$ : 507.1679, found 507.1677.

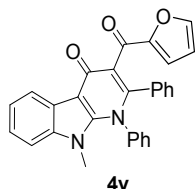

**3-(furan-2-carbonyl)-9-methyl-1,2-diphenyl-1,9-dihydro-4H-pyrido[2,3-b]indol-4-one (4v)**

Brown solid, 50% yield (44 mg); mp 268-270 °C.

$^1\text{H}$  NMR ( $\text{CDCl}_3$ , 400 MHz)  $\delta$  2.99 (s, 3H), 6.41 (d,  $J = 1.6$  Hz, 1H), 6.96-7.12 (m, 6H), 7.20 (d,  $J = 7.6$  Hz, 1H), 7.22-7.28 (m, 2H), 7.29-7.38 (m, 5H), 7.46 (s, 1H), 8.56 (d,  $J = 6.8$  Hz, 1H).

$^{13}\text{C}$  NMR ( $\text{CDCl}_3$ , 100 MHz)  $\delta$  31.65, 108.68, 108.78, 112.39, 119.06, 122.36, 122.53, 122.65, 124.38, 126.14, 127.73, 128.95, 129.59, 130.01, 130.57, 130.76, 131.65, 137.38, 138.02, 144.12, 146.71, 147.09, 153.99, 173.23, 183.06.

HRMS (ESI) calcd for  $\text{C}_{29}\text{H}_{20}\text{N}_2\text{NaO}_3$ ,  $[\text{M}+\text{Na}]^+$ : 467.1366, found 467.1366.

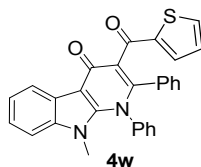

**9-methyl-1,2-diphenyl-3-(thiophene-2-carbonyl)-1,9-dihydro-4H-pyrido[2,3-b]indol-4-one (4w)**

Brown solid, 51% yield (47 mg); mp 317-319 °C.

$^1\text{H}$  NMR ( $\text{CDCl}_3$ , 400 MHz)  $\delta$  2.98 (s, 3H), 6.87-7.10 (m, 6H), 7.12-7.19 (m, 1H), 7.20-7.40 (m, 7H), 7.49 (d,  $J = 4.8$  Hz, 1H), 7.63 (d,  $J = 2.8$  Hz, 1H), 8.49-8.63 (m, 1H).

$^{13}\text{C}$  NMR ( $\text{CDCl}_3$ , 100 MHz)  $\delta$  31.64, 108.64, 108.78, 122.26, 122.42, 122.66, 124.30, 127.05, 127.67, 128.07, 128.84, 129.55, 129.96, 130.57, 130.91, 131.65, 133.95, 134.35, 137.36, 138.01, 144.08, 145.63, 146.74, 173.12, 187.71.

HRMS (ESI) calcd for  $\text{C}_{29}\text{H}_{20}\text{N}_2\text{NaO}_2\text{S}$ ,  $[\text{M}+\text{Na}]^+$ : 483.1138, found: 483.1142.

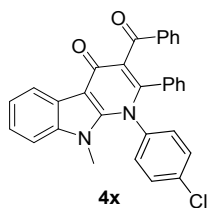

**3-benzoyl-1-(4-chlorophenyl)-9-methyl-2-phenyl-1,9-dihydro-4H-pyrido[2,3-b]indol-4-one  
(4x)**

Yellow solid, 75% yield (73 mg); mp 277-279 °C.

<sup>1</sup>H NMR (CDCl<sub>3</sub>, 400 MHz) δ 2.98 (s, 3H), 6.91-7.11 (m, 6H), 7.19 (d, *J* = 8.4 Hz, 2H), 7.22-7.33 (m, 6H), 7.36-7.44 (m, 1H), 7.81 (d, *J* = 7.6 Hz, 2H), 8.46-8.55 (m, 1H).

<sup>13</sup>C NMR (CDCl<sub>3</sub>, 100 MHz) δ 31.86, 108.38, 108.82, 122.18, 122.21, 122.47, 124.30, 127.02, 127.86, 128.43, 128.98, 129.34, 129.68, 130.73, 131.42, 131.87, 133.01, 135.93, 136.48, 137.22, 138.05, 143.92, 146.40, 173.34, 195.91.

HRMS (ESI) calcd for C<sub>31</sub>H<sub>21</sub>ClN<sub>2</sub>NaO<sub>2</sub>, [M+Na]<sup>+</sup>: 511.1184, found 511.1185.

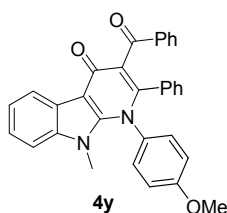

**3-benzoyl-1-(4-methoxyphenyl)-9-methyl-2-phenyl-1,9-dihydro-4H-pyrido[2,3-b]indol-4-one  
(4y)**

Yellow solid, 69% yield (66 mg); mp 291-293 °C.

<sup>1</sup>H NMR (CDCl<sub>3</sub>, 400 MHz) δ 3.01 (s, 3H), 3.75 (s, 3H), 6.79 (d, *J* = 8.8 Hz, 2H), 6.93-7.06 (m, 5H), 7.09-7.21 (m, 3H), 7.24-7.35 (m, 4H), 7.37-7.45 (m, 1H), 7.83 (d, *J* = 8.0 Hz, 2H), 8.54 (dd, *J*<sub>1</sub> = 5.6 Hz, *J*<sub>2</sub> = 2.4 Hz, 1H).

<sup>13</sup>C NMR (CDCl<sub>3</sub>, 100 MHz) δ 31.62, 55.36, 108.47, 108.75, 114.43, 122.18, 122.37, 122.67, 124.24, 126.96, 127.66, 128.40, 128.72, 129.37, 130.34, 130.74, 131.57, 131.91, 132.89, 137.37, 138.28, 144.40, 147.04, 160.35, 173.41, 196.13.

HRMS (ESI) calcd for C<sub>32</sub>H<sub>25</sub>N<sub>2</sub>O<sub>3</sub>, [M+H]<sup>+</sup>: 485.1860, found 485.1860.

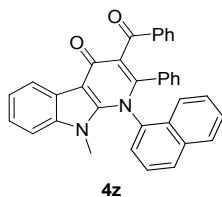

**3-benzoyl-9-methyl-1-(naphthalen-1-yl)-2-phenyl-1,9-dihydro-4H-pyrido[2,3-b]indol-4-one  
(4z)**

Light yellow solid, 71% yield (72 mg); mp 175-178 °C.

$^1\text{H}$  NMR (DMSO- $d_6$ , 400 MHz)  $\delta$  2.68 (s, 3H), 6.53-6.65 (m, 1H), 6.70 (d,  $J$  = 8.0 Hz, 1H), 6.88 (t,  $J$  = 7.6 Hz, 1H), 6.93-7.04 (m, 1H), 7.28-7.68 (m, 11H), 7.89 (d,  $J$  = 8.0 Hz, 2H), 7.95-8.08 (m, 3H), 8.34 (d,  $J$  = 7.6 Hz, 1H).

$^{13}\text{C}$  NMR (DMSO- $d_6$ , 100 MHz)  $\delta$  31.04, 107.36, 110.19, 121.10, 122.19, 122.23, 122.29, 124.35, 125.39, 126.37, 126.99, 127.28, 127.57, 128.92, 128.98, 129.04, 129.20, 129.43, 130.88, 131.06, 131.40, 131.53, 131.74, 133.44, 133.57, 137.32, 137.92, 144.52, 146.91, 172.98, 195.93.

HRMS (ESI) calcd for  $\text{C}_{35}\text{H}_{24}\text{N}_2\text{NaO}_2$ ,  $[\text{M}+\text{Na}]^+$ : 527.1730, found 527.1730.

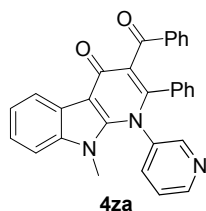

### 3-benzoyl-9-methyl-2-phenyl-1-(pyridin-3-yl)-1,9-dihydro-4H-pyrido[2,3-b]indol-4-one (4za)

Brown solid, 80% yield (73 mg); mp 253-255 °C.

$^1\text{H}$  NMR ( $\text{CDCl}_3$ , 400 MHz)  $\delta$  2.99 (s, 3H), 6.90-7.14 (m, 6H), 7.19-7.35 (m, 5H), 4.39-7.48 (m, 1H), 7.66 (d,  $J$  = 8.0 Hz, 1H), 7.83 (d,  $J$  = 8.0 Hz, 2H), 8.43-8.61 (m, 3H).

$^{13}\text{C}$  NMR ( $\text{CDCl}_3$ , 100 MHz)  $\delta$  32.37, 108.56, 108.87, 122.32, 122.47, 122.50, 124.07, 124.52, 127.37, 128.17, 128.52, 129.25, 129.38, 130.78, 131.21, 133.17, 135.32, 137.18, 137.98, 138.03, 143.99, 146.42, 150.80, 150.90, 173.43, 195.72.

HRMS (ESI) calcd for  $\text{C}_{30}\text{H}_{21}\text{N}_3\text{NaO}_2$ ,  $[\text{M}+\text{Na}]^+$ : 478.1526, found 478.1528.

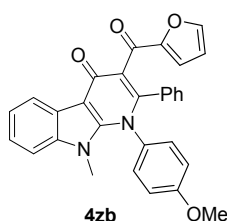

### 3-(furan-2-carbonyl)-1-(4-methoxyphenyl)-9-methyl-2-phenyl-1,9-dihydro-4H-pyrido[2,3-b]indol-4-one (4zb)

Dark yellow solid, 64% yield (60 mg); mp 286-288 °C.

$^1\text{H}$  NMR ( $\text{CDCl}_3$ , 400 MHz)  $\delta$  2.99 (s, 3H), 3.76 (s, 3H), 6.38 (d,  $J$  = 1.6 Hz, 1H), 6.79 (d,  $J$  = 8.8 Hz, 2H), 6.96-7.09 (m, 6H), 7.09-7.19 (m, 3H), 7.23-7.33 (m, 2H), 7.43 (s, 1H), 8.48-8.59 (m, 1H).

$^{13}\text{C}$  NMR ( $\text{CDCl}_3$ , 100 MHz)  $\delta$  31.59, 55.36, 108.47, 108.76, 112.30, 114.42, 118.99, 122.10, 122.31, 122.64, 124.17, 126.00, 127.69, 128.81, 130.24, 130.67, 131.59, 131.78, 137.28, 144.24, 146.59, 147.51, 153.99, 160.34, 173.13, 183.09.

HRMS (ESI) calcd for  $\text{C}_{30}\text{H}_{22}\text{N}_2\text{NaO}_4$ ,  $[\text{M}+\text{Na}]^+$ : 497.1472, found: 497.1469.

## 3. Control experiments

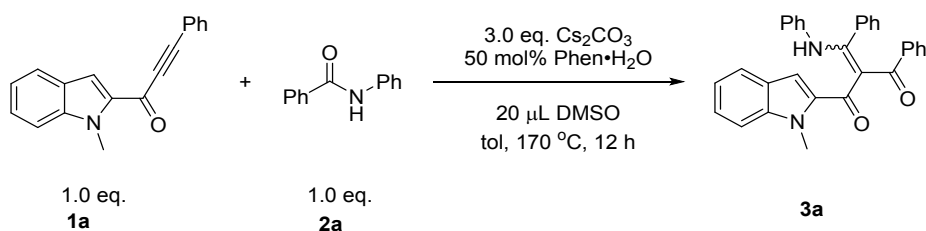

In a dried sealed tube ynone **1a** (0.2 mmol, 51.9 mg), *N*-phenylbenzamide **2a** (0.2 mmol, 39.4 mg), 1,10-phenanthroline hydrate (0.1 mmol, 19.8 mg), cesium carbonate (0.6 mmol, 195.6 mg), toluene (2 mL) and dimethyl sulfoxide (20  $\mu\text{L}$ ) were added, and the mixture was heated at 170  $^\circ\text{C}$  for 12 h. After the reaction was complete as monitored by thin-layer chromatography, the reaction mixture was then quenched by water (20 mL), a portion of ethyl acetate (20 mL) was added and the combined organic layer was washed with water (50 mL), brine (50 mL). Combined aqueous phase was extracted with ethyl acetate (50 mL  $\times$  2). The combined organic phase was dried over with anhydrous  $\text{Na}_2\text{SO}_4$ , filtered, and concentrated under reduced pressure, Purification by chromatography on silica gel (petroleum ether / ethyl acetate = 8/1) afforded desired compound **3a**.

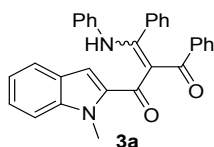

### 1-(1-methyl-1H-indol-2-yl)-3-phenyl-2-(phenyl(phenylamino)methylene)propane-1,3-dione (**3a**)

Light yellow solid, 91 % yield (83 mg); mp 214-216  $^\circ\text{C}$ .

$^1\text{H NMR}$  ( $\text{CDCl}_3$ , 400 MHz) Obtained as 3.7:1 isomer, Major isomer:  $\delta$  3.58 (s, 3H), 6.81 (d,  $J = 8.0$  Hz, 2H), 6.96-7.53 (m, 17H), 7.56 (d,  $J = 8.0$  Hz, 1H), 13.77 (s, 1H); minor isomer:  $\delta$  3.87 (s, 3H), 6.62 (s, 1H), 7.44 (d,  $J = 8.0$  Hz, 1H), 7.67 (d,  $J = 8.0$  Hz, 2H), 13.61 (s, 1H); other peaks are overlapped with the other isomer.

$^{13}\text{C NMR}$  (100 MHz,  $\text{CDCl}_3$ )  $\delta$  30.77, 31.10, 108.37, 109.71, 110.00, 112.32, 114.08, 120.07, 120.37, 122.45, 122.84, 124.19, 124.40, 124.54, 125.24, 125.54, 125.62, 125.89, 126.50, 127.29, 128.02, 128.08, 128.28, 128.40, 128.99, 129.19, 129.30, 129.56, 129.70, 130.15, 131.97, 133.01, 133.16, 138.48, 138.69, 139.11, 139.96, 140.08, 141.38, 142.53, 164.26, 164.79, 185.90, 189.31, 194.66, 196.66.

HRMS (ESI) calcd for  $\text{C}_{31}\text{H}_{24}\text{N}_2\text{NaO}_2$ ,  $[\text{M}+\text{Na}]^+$ : 479.1730, found: 479.1737.

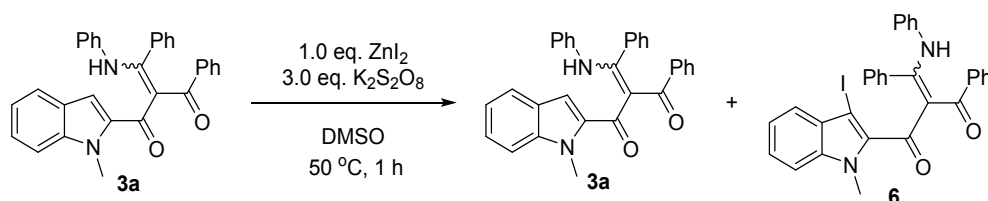

In a Schlenk tube intermediate **3a** (0.2 mmol, 91.3 mg), zinc iodide (0.2 mmol, 63.8 mg), potassium persulfate (0.6 mmol, 162.8 mg) and dimethyl sulfoxide (2 mL) were added, and the mixture was heated at 50 °C. After the reaction was heated at 50°C for 1 h, the reaction mixture was then quenched by water (10 mL), a portion of ethyl acetate (20 mL) was added and the combined organic layer was washed with water (50 mL), saturated sodium thiosulfate solution (50 mL), brine (50 mL). Combined aqueous phase was extracted with ethyl acetate (50 mL× 2). The combined organic phase was dried over with anhydrous Na<sub>2</sub>SO<sub>4</sub>, filtered, and concentrated under reduced pressure, Purification by chromatography on silica gel (petroleum ether / ethyl acetate = 6/1) afforded compound **3a** (13.7 mg, 15%) and compound **6** (63.4 mg, 54%).

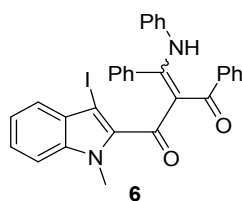

**1-(3-iodo-1-methyl-1H-indol-2-yl)-3-phenyl-2-(phenyl(phenylamino)methylene)propane-1,3-dione (6)**

Yellow solid, 54% yield (63 mg); mp 210-212 °C.

<sup>1</sup>H NMR (400 MHz, CDCl<sub>3</sub>) Obtained as 7:1 isomer, Major isomer: δ 3.54 (s, 3H), 6.81 (d, *J* = 8.0 Hz, 2H), 6.89-7.38 (m, 14H), 7.40 (d, *J* = 8.4 Hz, 1H), 7.43-7.52 (m, 2H), 14.04 (s, 1H); minor isomer: δ 3.75 (s, 3H) ; other peaks are overlapped with the other isomer.

<sup>13</sup>C NMR (100 MHz, CDCl<sub>3</sub>) δ 31.71, 66.95, 109.94, 114.90, 120.82, 121.21, 123.72, 124.71, 125.00, 125.96, 126.06, 126.23, 127.01, 127.86, 127.92, 128.49, 128.58, 129.01, 129.20, 129.57, 129.65, 129.77, 129.96, 133.20, 138.27, 139.14, 139.40, 142.48, 165.88, 188.50, 194.93.

HRMS (ESI) calcd for C<sub>31</sub>H<sub>23</sub>IN<sub>2</sub>NaO<sub>2</sub>, [M+Na]<sup>+</sup>: 605.0696, found: 605.0701.

**4. Transformations of 4a**

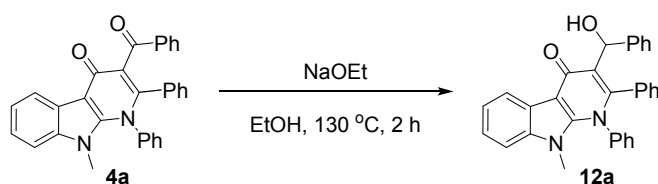

In a dried sealed tube **4a** (0.2 mmol, 91.3 mg), NaOEt / EtOH (20%, 1 mL) was added, and then mixture was heated at 130 °C for 2 h. After the reaction was complete as monitored by thin-layer chromatography, the reaction mixture was then quenched by water (10 mL), a portion of ethyl acetate (10 mL) was added and the combined organic layer was washed with water (20 mL), brine (20 mL). The combined organic phase was dried over with anhydrous Na<sub>2</sub>SO<sub>4</sub>, filtered, and concentrated under reduced pressure, purification by chromatography on silica gel (petroleum ether / ethyl acetate = 5/1) to give the final product as a yellow solid.

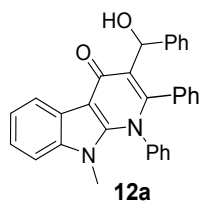

**3-(hydroxy(phenyl)methyl)-9-methyl-1,2-diphenyl-1,9-dihydro-4H-pyrido[2,3-b]indol-4-one (12a)**

Yellow solid, 73% yield (67 mg); mp 260-262 °C.

<sup>1</sup>H NMR (CDCl<sub>3</sub>, 600 MHz) δ 2.94 (s, 3H), 5.20 (s, 1H), 6.83 (d, *J* = 7.2 Hz, 1H), 7.05-7.08 (m, 1H), 7.13-7.23 (m, 9H), 7.26-7.38 (m, 8H), 8.55 (d, *J* = 7.2 Hz, 1H).

<sup>13</sup>C NMR (CDCl<sub>3</sub>, 150 MHz) δ 176.20, 145.88, 144.62, 143.91, 138.18, 137.23, 132.31, 130.73, 130.21, 130.11, 129.60, 129.27, 129.10, 128.70, 128.21, 127.94, 127.66, 126.71, 126.42, 124.25, 123.40, 122.15, 122.06, 108.57, 108.46, 74.72, 31.61.

HRMS (ESI) calcd for C<sub>31</sub>H<sub>25</sub>N<sub>2</sub>O<sub>2</sub>, [M+H]<sup>+</sup>: 457.1911, found: 457.1914.

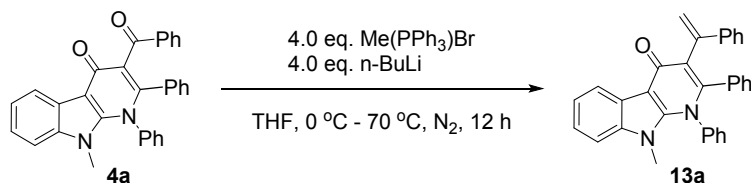

To a solution of methyltriphenylphosphonium bromide (284 mg, 0.8 mmol, 4.0 equiv) in anhydrous THF (2 mL), *n*-BuLi (0.32 mL, 2.5 M in hexane, 0.8 mmol, 4.0 equiv) was added at 0 °C. The resulting mixture was stirred at 0 °C for 90 min. A solution of **4a** (91.3 mg, 0.2 mmol, 1.0 equiv) in THF was then added and warmed to 70 °C and stirred for 12 h. The resulting mixture was quenched with a saturated solution of NH<sub>4</sub>Cl and extracted with ethyl acetate (10 mL × 3). The combined organic layers were washed with brine and dried over with anhydrous Na<sub>2</sub>SO<sub>4</sub>, filtered, and concentrated under reduced pressure. Purification by column chromatography with petroleum ether / ethyl acetate = 2/1 as the eluent to give the final product as a white solid.

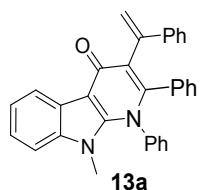

**9-methyl-1,2-diphenyl-3-(1-phenylvinyl)-1,9-dihydro-4H-pyrido[2,3-b]indol-4-one (13a)**

White solid, 78% yield (71 mg); mp 273-275 °C.

<sup>1</sup>H NMR (CDCl<sub>3</sub>, 600 MHz) δ 2.99 (s, 3H), 5.14 (s, 1H), 5.65 (s, 1H), 6.74-7.05 (m, 5H), 7.09-7.17 (m, 3H), 7.18-7.35 (m, 10H), 8.59-8.67 (m, 1H).

<sup>13</sup>C NMR (CDCl<sub>3</sub>, 150 MHz) δ 174.19, 146.56, 144.03, 142.87, 141.36, 138.82, 137.18, 133.73, 130.54, 130.35, 129.31, 129.13, 127.82, 127.69, 127.45, 127.06, 126.80, 126.12, 123.78, 122.94, 122.42, 121.96, 118.42, 108.32, 108.07, 31.74.

HRMS (ESI) calcd for C<sub>32</sub>H<sub>25</sub>N<sub>2</sub>O, [M+H]<sup>+</sup>: 453.1961, found: 453.1961.



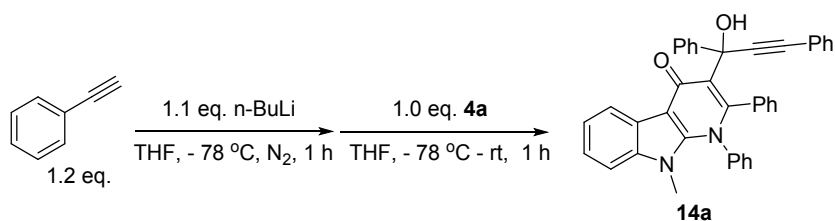

To a solution of ethynylbenzene (29  $\mu$ L, 0.26 mmol) in anhydrous THF (2 mL), n-BuLi (2.5M, 0.24 mmol, 0.1 mL) was added at -78 °C. The resulting mixture was stirred at -78 °C for 40 min, then the **4a** (91.3 mg, 0.2 mmol) was added and the reaction temperature was raised to room temperature till **4a** disappeared by TLC analysis. The resulting mixture was quenched with a saturated solution of NH<sub>4</sub>Cl and extracted with ethyl acetate (10 mL  $\times$  3). The combined organic layers were washed with brine and dried over with anhydrous Na<sub>2</sub>SO<sub>4</sub>, filtered, and concentrated under reduced pressure. Purification by column chromatography with petroleum ether / ethyl acetate = 1/1 as the eluent to give the final product as a white solid.

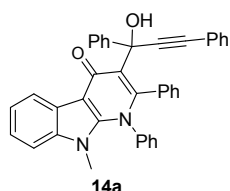

### 3-(1-hydroxy-1,3-diphenylprop-2-yn-1-yl)-9-methyl-1,2-diphenyl-1,9-dihydro-4H-pyrido[2,3-b]indol-4-one (**14a**)

White solid, 72% yield (80 mg); mp 255-257 °C.

<sup>1</sup>H NMR (CDCl<sub>3</sub>, 600 MHz)  $\delta$  2.86 (s, 3H), 5.96 (d,  $J$  = 7.2 Hz, 1H), 6.44-6.49 (m, 1H), 6.82-6.86 (m, 1H), 6.89-6.95 (m, 2H), 6.96-7.02 (m, 3H), 7.13-7.16 (m, 1H), 7.18-7.23 (m, 4H), 7.25-7.28 (m, 3H), 7.33 (d,  $J$  = 7.2 Hz, 2H), 7.37-7.42 (m, 4H), 8.64-8.68 (m, 1H), 11.23 (s, 1H).

<sup>13</sup>C NMR (CDCl<sub>3</sub>, 150 MHz)  $\delta$  177.51, 147.76, 145.90, 143.54, 137.93, 132.29, 131.98, 131.50, 131.31, 130.77, 130.42, 129.48, 129.05, 128.79, 127.97, 127.84, 127.56, 127.48, 126.76, 126.63, 126.52, 126.34, 125.11, 124.55, 123.51, 122.45, 122.33, 122.29, 108.66, 108.47, 92.75, 87.20, 75.79, 31.49.

HRMS (ESI) calcd for C<sub>39</sub>H<sub>29</sub>N<sub>2</sub>O<sub>2</sub>, [M+H]<sup>+</sup>: 557.2224, found: 557.2239.

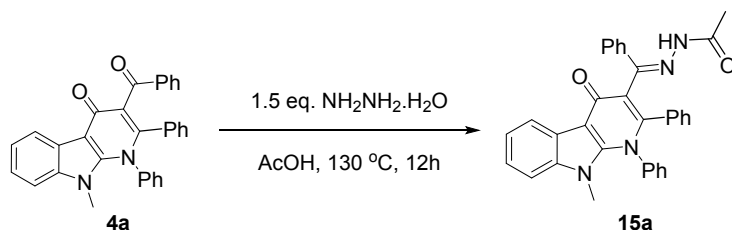

In a dried sealed tube **4a** (0.2 mmol, 91.3 mg), AcOH (1 mL), NH<sub>2</sub>NH<sub>2</sub>·H<sub>2</sub>O (85%, 0.2 mmol, 19  $\mu$ L) was added, and then the mixture was heated at 130 °C for 12 h. After the reaction was

complete as monitored by thin-layer chromatography, the reaction mixture was then quenched by water (10 mL), a portion of ethyl acetate (10 mL) was added and the combined organic layer was washed with saturated solution of NaHCO<sub>3</sub> (20 mL), water (20 mL), brine (20 mL). The combined organic phase was dried over with anhydrous Na<sub>2</sub>SO<sub>4</sub>, filtered, and concentrated under reduced pressure, purification by chromatography on silica gel (ethyl acetate) to give the final product as a white solid.

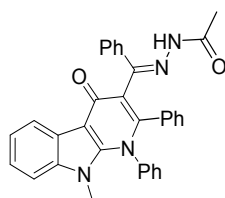

15a

### 3-((E)-((Z)-ethylidene)hydrazono)(phenyl)methyl-9-methyl-1,2-diphenyl-1,9-dihydro-4H-pyrido[2,3-b]indol-4-one (15a)

White solid, 87% yield (89 mg); mp 283-285 °C.

<sup>1</sup>H NMR (CDCl<sub>3</sub>, 600 MHz) δ 2.25 (s, 3H), 3.06 (s, 3H), 6.61 (d, *J* = 7.8 Hz, 1H), 6.75-6.85 (m, 1H), 7.00-7.10 (m, 3H), 7.19-7.27 (m, 4H), 7.28-7.45 (m, 7H), 7.48-7.56 (m, 2H), 8.58 (d, *J* = 7.2 Hz, 1H), 8.80 (s, 1H).

<sup>13</sup>C NMR (CDCl<sub>3</sub>, 150 MHz) δ 173.13, 171.88, 147.89, 146.91, 144.12, 137.85, 137.50, 137.28, 131.66, 130.19, 130.08, 129.91, 129.56, 129.35, 129.33, 128.96, 128.89, 128.82, 128.01, 127.56, 127.29, 126.68, 124.60, 122.63, 122.54, 122.31, 117.79, 108.70, 108.63, 31.94, 20.58.

HRMS (ESI) calcd for C<sub>33</sub>H<sub>26</sub>N<sub>4</sub>O<sub>2</sub>, [M+Na]<sup>+</sup>: 533.1948, found: 533.1944.

## 5. Computational methods

All DFT calculations were conducted with Gaussian 09 program, ‘Ultrafine’ grid and SMD solvation model (solvent = dimethylsulfoxide). Geometry optimization, frequency analysis and intrinsic reaction coordinate analysis were performed with B3LYP method and basis set Lanl2DZ for Zn, Cs, I and 6-31G(d) for the other elements. The optimized structures have no imaginary frequency for energy minima and only one imaginary frequency for the transition states. Based on the optimized structures, solution-phase single-point energies were calculated with B3LYP-D3 method larger basis sets of SDD for Zn, Cs, I and 6-311++G (d, p) for the other elements. The thermodynamic correction obtained from frequency analysis was added to the solution-phase single-point energies to get the solution-phase Gibbs free energies which were used for mechanistic discussion.

Note that the geometry optimization of **TS1** and **TS5** did not reach all convergence criteria though much effort has been devoted to the geometry optimization. This is possibly because the potential energy curve for step is too abrupt. To estimate the energy of **TS1** and **TS5**, we directly performed frequency analysis (still got only one imaginary frequency with the proper vibration

direction) and solution-phase single-point energy calculation when the changes of the energy of transition state oscillates with setting the maximum size of optimization step to be 0.03 bohr.

**Table S2. Calculated thermodynamic corrections ( $\Delta G_{\text{cor}}$ ), solution-phase single point energies ( $E_{\text{sol}}$ ) and solution-phase Gibbs free energies ( $\Delta G_{\text{sol}}$ ) (in Hartree).**

|                    | $\Delta G_{\text{cor}}$ | $\Delta E_{\text{sol}}$ | $\Delta G_{\text{sol}}$ |
|--------------------|-------------------------|-------------------------|-------------------------|
| <b>3a</b>          | 0.40846                 | -1456.175618            | -1455.767158            |
| $\text{CO}_3^{2-}$ | -0.011265               | -264.1152742            | -264.1265392            |
| $\text{HCO}_3^-$   | 0.000518                | -264.645238             | -264.64472              |
| <b>7</b>           | 0.39654                 | -1455.689431            | -1455.292891            |
| $\text{I}_2$       | -0.025533               | -22.8389178             | -22.8644508             |
| <b>8</b>           | 0.387228                | -1478.562556            | -1478.175328            |
| <b>TS1</b>         | 0.385884                | -1478.55251             | -1478.166626            |
| $\text{I}^-$       | -0.016848               | -11.60716715            | -11.62401515            |
| <b>9</b>           | 0.396695                | -1466.987906            | -1466.591211            |
| <b>10</b>          | 0.380192                | -1466.463811            | -1466.083619            |
| <b>TS2</b>         | 0.382074                | -1466.447954            | -1466.06588             |
| <b>11</b>          | 0.386917                | -1454.870734            | -1454.483817            |
| <b>TS3</b>         | 0.386899                | -1454.856577            | -1454.469678            |
| <b>pro</b>         | 0.390518                | -1454.980704            | -1454.590186            |
| <b>12</b>          | 0.385833                | -1705.856392            | -1705.470559            |
| <b>TS4</b>         | 0.384422                | -1705.8376              | -1705.453178            |
| <b>13</b>          | 0.392793                | -1466.952411            | -1466.559618            |
| <b>TS5</b>         | 0.395012                | -1466.917727            | -1466.522715            |

**Cartesian coordinates of all calculated intermediates and transition states (in angstrom)**

|           |            |             |             |   |             |             |             |
|-----------|------------|-------------|-------------|---|-------------|-------------|-------------|
| <b>3a</b> |            |             |             | H | 2.64187300  | 1.93087800  | -2.19990900 |
| C         | 3.25853900 | -1.89358400 | -0.22909700 | C | 0.56758800  | 0.37529000  | -1.39393700 |
| C         | 3.98859800 | -0.79166500 | -0.76659000 | O | 0.57378800  | 1.18598900  | -2.32356000 |
| C         | 5.39351000 | -0.76664600 | -0.76989700 | C | -0.71387700 | -0.01877400 | -0.72152000 |
| C         | 6.05476900 | -1.87095700 | -0.24765200 | C | -1.80532400 | -0.35463900 | -1.67520000 |
| C         | 5.34777500 | -2.98039300 | 0.27600200  | C | -0.84328800 | -0.09948900 | 0.65562500  |
| C         | 3.96127300 | -3.00154200 | 0.28956800  | C | -1.89286200 | -0.91579700 | 1.32291500  |
| C         | 1.88015600 | -1.56418300 | -0.35894000 | C | -2.23041000 | -2.18662400 | 0.82548000  |
| C         | 1.80035500 | -0.31722700 | -0.96045300 | C | -2.52289100 | -0.45279800 | 2.49242800  |
| H         | 5.94488400 | 0.08021900  | -1.16647100 | C | -3.18651200 | -2.96791600 | 1.47388200  |
| H         | 7.14157200 | -1.88404600 | -0.24070000 | H | -1.72612000 | -2.57175600 | -0.05514100 |
| H         | 5.90514000 | -3.82394200 | 0.67448200  | C | -3.48218500 | -1.23409700 | 3.13509400  |
| H         | 3.42092100 | -3.85223700 | 0.69727700  | H | -2.27689700 | 0.53074500  | 2.88231200  |
| H         | 1.03679900 | -2.17843900 | -0.07606700 | C | -3.81654800 | -2.49317800 | 2.62743900  |
| N         | 3.09187100 | 0.14522200  | -1.22586800 | H | -3.43196400 | -3.95171600 | 1.08368900  |
| C         | 3.48967900 | 1.46417300  | -1.70583200 | H | -3.97226700 | -0.85863500 | 4.02914600  |
| H         | 3.83016500 | 2.09268600  | -0.87483100 | H | -4.56180200 | -3.10293600 | 3.13095200  |
| H         | 4.30656600 | 1.35598700  | -2.42557100 | N | 0.00929500  | 0.51010800  | 1.54422600  |

|                                    |             |             |             |   |             |             |             |
|------------------------------------|-------------|-------------|-------------|---|-------------|-------------|-------------|
| H                                  | 0.07188500  | 0.06907800  | 2.45560700  | C | -3.93284200 | 2.96661700  | 0.05737900  |
| C                                  | 0.79019900  | 1.68182000  | 1.41645900  | C | -1.84461400 | 1.51166600  | -0.55311800 |
| C                                  | 1.92738300  | 1.80192300  | 2.23134000  | C | -1.76162800 | 0.19962400  | -0.98223800 |
| C                                  | 0.42144200  | 2.75026300  | 0.58328300  | H | -5.89884300 | -0.32290000 | -0.85534400 |
| C                                  | 2.68521400  | 2.97259700  | 2.21180100  | H | -7.10514800 | 1.71443500  | -0.11151100 |
| H                                  | 2.20931400  | 0.97537400  | 2.87854100  | H | -5.87565200 | 3.78774500  | 0.46150500  |
| C                                  | 1.19242700  | 3.91248900  | 0.56691300  | H | -3.39891300 | 3.87973100  | 0.31057100  |
| H                                  | -0.46257600 | 2.67826200  | -0.03992600 | H | -1.00525000 | 2.17871100  | -0.41233000 |
| C                                  | 2.32618700  | 4.03382600  | 1.37599400  | N | -3.04915500 | -0.33068000 | -1.06743000 |
| H                                  | 3.56095100  | 3.05085100  | 2.85045100  | C | -3.43233100 | -1.68506500 | -1.44154200 |
| H                                  | 0.89395300  | 4.73424400  | -0.07871400 | H | -4.19654300 | -2.05001400 | -0.74881700 |
| H                                  | 2.91817900  | 4.94441700  | 1.35799300  | H | -3.83590600 | -1.71139100 | -2.46054200 |
| O                                  | -1.55191100 | -0.95746800 | -2.72125100 | H | -2.56381300 | -2.33672300 | -1.39827000 |
| C                                  | -3.21714100 | 0.10303200  | -1.42446600 | C | -0.55675600 | -0.53713800 | -1.49948300 |
| C                                  | -3.52211100 | 1.22832300  | -0.64320000 | O | -0.73723700 | -1.27190500 | -2.48650500 |
| C                                  | -4.26005900 | -0.57535600 | -2.07732700 | C | 0.73928100  | -0.26059600 | -0.88868000 |
| C                                  | -4.84349400 | 1.66063500  | -0.51248600 | C | 1.91873200  | -0.34512500 | -1.73785900 |
| H                                  | -2.72689900 | 1.77965300  | -0.15129100 | C | 0.82207600  | 0.11862300  | 0.52463600  |
| C                                  | -5.57999200 | -0.15432300 | -1.93354500 | C | 1.70476500  | 1.27179200  | 0.92737600  |
| H                                  | -4.01814400 | -1.43474700 | -2.69478700 | C | 1.97177600  | 2.33092700  | 0.04415300  |
| C                                  | -5.87493200 | 0.96732300  | -1.15033300 | C | 2.23546600  | 1.34036800  | 2.22757200  |
| H                                  | -5.06633700 | 2.54022100  | 0.08559600  | C | 2.74130700  | 3.42494500  | 0.44766100  |
| H                                  | -6.37948200 | -0.69553900 | -2.43264700 | H | 1.56352700  | 2.30286100  | -0.96120700 |
| H                                  | -6.90370200 | 1.30087500  | -1.04249700 | C | 3.01187300  | 2.42600200  | 2.62957500  |
| <b>CO<sub>3</sub><sup>2-</sup></b> |             |             |             | H | 2.03296800  | 0.52717700  | 2.91752100  |
| C                                  | -0.00036300 | 0.00010700  | 0.00031300  | C | 3.26722800  | 3.47591600  | 1.74049100  |
| O                                  | 0.61095300  | 1.15361400  | 0.00000100  | H | 2.92677500  | 4.23854800  | -0.24906100 |
| O                                  | -1.30471200 | -0.04797800 | -0.00021500 | H | 3.42106800  | 2.45378400  | 3.63649000  |
| O                                  | 0.69403100  | -1.10571500 | -0.00002100 | H | 3.87056800  | 4.32415700  | 2.05364800  |
| <b>HCO<sub>3</sub><sup>-</sup></b> |             |             |             | N | 0.13872500  | -0.38284700 | 1.52118400  |
| C                                  | -0.14777200 | 0.06485200  | 0.00004100  | C | -0.62605100 | -1.55405200 | 1.47545600  |
| O                                  | 0.08085900  | 1.29754100  | 0.00005600  | C | -1.86079700 | -1.55475100 | 2.15890500  |
| O                                  | -1.21398800 | -0.57704400 | -0.00002100 | C | -0.17879800 | -2.77635400 | 0.92593500  |
| O                                  | 1.02565700  | -0.75611600 | -0.00009300 | C | -2.62677500 | -2.71501400 | 2.26912300  |
| H                                  | 1.74640500  | -0.10416300 | 0.00021100  | H | -2.20440100 | -0.62374600 | 2.60258100  |
| <b>7</b>                           |             |             |             | C | -0.93899000 | -3.93891700 | 1.05934100  |
| C                                  | -3.22494200 | 1.82103000  | -0.35788100 | H | 0.77053200  | -2.81315200 | 0.40272100  |
| C                                  | -3.95241600 | 0.63767100  | -0.68657700 | C | -2.17077000 | -3.91894500 | 1.72247600  |
| C                                  | -5.35210900 | 0.58021300  | -0.60018700 | H | -3.57733200 | -2.68080700 | 2.79650700  |
| C                                  | -6.02056400 | 1.72748900  | -0.18379700 | H | -0.56348200 | -4.86975800 | 0.63992900  |
| C                                  | -5.31885800 | 2.91061700  | 0.14135700  | H | -2.75945500 | -4.82733000 | 1.81879900  |
|                                    |             |             |             | O | 1.88849200  | -0.30386200 | -2.98162400 |
|                                    |             |             |             | C | 3.30083100  | -0.52296300 | -1.12354800 |
|                                    |             |             |             | C | 4.39754700  | 0.03298100  | -1.80335700 |

|                      |             |             |             |            |             |             |             |
|----------------------|-------------|-------------|-------------|------------|-------------|-------------|-------------|
| C                    | 3.55004200  | -1.29900600 | 0.01827600  | H          | -3.65992900 | -0.50428700 | 2.77075600  |
| C                    | 5.69977800  | -0.15306700 | -1.34214000 | C          | -1.66782300 | -3.09145800 | 3.73980300  |
| H                    | 4.20935600  | 0.61185200  | -2.70247100 | H          | 0.00523300  | -3.84430400 | 2.60432800  |
| C                    | 4.85630300  | -1.50658400 | 0.47193100  | H          | -3.38023000 | -2.12229000 | 4.63038000  |
| H                    | 2.72539800  | -1.75648100 | 0.55494900  | H          | -1.54167700 | -3.80021700 | 4.55409100  |
| C                    | 5.93471800  | -0.92896000 | -0.20138700 | N          | -2.70561300 | 0.87848100  | 0.90646700  |
| H                    | 6.53337200  | 0.30056500  | -1.87296900 | C          | -3.19989900 | 1.89774000  | 0.07868200  |
| H                    | 5.02950200  | -2.12237200 | 1.35112700  | C          | -3.15049700 | 3.20935400  | 0.59583100  |
| H                    | 6.94973600  | -1.08372100 | 0.15583700  | C          | -3.87048400 | 1.69514700  | -1.14794300 |
| <b>I<sub>2</sub></b> |             |             |             | C          | -3.72423800 | 4.27890800  | -0.09037700 |
| I                    | 0.00000000  | 0.00000000  | 1.43061700  | H          | -2.66021300 | 3.36725800  | 1.55272800  |
| I                    | 0.00000000  | 0.00000000  | -1.43061700 | C          | -4.46403200 | 2.76624900  | -1.81667200 |
| <b>8</b>             |             |             |             | H          | -3.94098900 | 0.69787400  | -1.56665300 |
| C                    | 1.05231400  | 2.63309200  | 1.09627000  | C          | -4.38923400 | 4.06459500  | -1.30200800 |
| C                    | 0.64696700  | 3.49788800  | 0.07176900  | H          | -3.66619400 | 5.27933100  | 0.33146000  |
| C                    | 0.89259800  | 4.86514500  | 0.08935600  | H          | -4.99043500 | 2.58211800  | -2.75027200 |
| C                    | 1.57240900  | 5.36392000  | 1.20614700  | H          | -4.85139000 | 4.89350600  | -1.83116900 |
| C                    | 1.97661800  | 4.51806200  | 2.24827700  | O          | -1.24512400 | -2.22969000 | -2.46051600 |
| C                    | 1.72638100  | 3.14201600  | 2.20248200  | C          | -3.08102500 | -2.68588000 | -1.06835000 |
| C                    | 0.64040800  | 1.26651400  | 0.70252900  | C          | -2.95663400 | -4.07335700 | -1.25258500 |
| C                    | -0.13729200 | 1.46721800  | -0.54857200 | C          | -4.29918000 | -2.18164100 | -0.58805400 |
| H                    | 0.57164800  | 5.51930400  | -0.71388100 | C          | -4.00654400 | -4.93543400 | -0.94197000 |
| H                    | 1.78584300  | 6.42700000  | 1.26442800  | H          | -2.02255000 | -4.46271900 | -1.64519500 |
| H                    | 2.49549500  | 4.93764800  | 3.10506600  | C          | -5.36119600 | -3.04234700 | -0.29560700 |
| H                    | 2.05562500  | 2.48854000  | 3.00453900  | H          | -4.43646700 | -1.11410900 | -0.45471600 |
| H                    | 0.20967500  | 0.60402900  | 1.44631400  | C          | -5.21678500 | -4.42084500 | -0.46412500 |
| N                    | -0.05358100 | 2.73601000  | -0.90641100 | H          | -3.88551800 | -6.00736600 | -1.07676500 |
| C                    | -0.58599900 | 3.35870100  | -2.11983300 | H          | -6.30229100 | -2.63247200 | 0.06209900  |
| H                    | -1.22635100 | 4.19426400  | -1.83084200 | H          | -6.04077200 | -5.08958300 | -0.22893600 |
| H                    | 0.25371800  | 3.73038400  | -2.71389700 | I          | 2.51659100  | 0.03602300  | 0.10906300  |
| H                    | -1.14241600 | 2.62395200  | -2.69167700 | I          | 5.46658500  | -1.82255100 | -0.58841100 |
| C                    | -0.75459400 | 0.38655300  | -1.43337300 | <b>TS1</b> |             |             |             |
| O                    | -0.34676700 | 0.42187800  | -2.60904900 | C          | 0.95072600  | 2.70776900  | 1.03338200  |
| C                    | -1.62988400 | -0.55673400 | -0.81063800 | C          | 0.59314800  | 3.47479600  | -0.08458000 |
| C                    | -1.91402400 | -1.81645500 | -1.50266600 | C          | 0.85457500  | 4.83646200  | -0.17324600 |
| C                    | -2.16618300 | -0.24876300 | 0.52759900  | C          | 1.48496600  | 5.43222000  | 0.92642000  |
| C                    | -2.00002800 | -1.25709000 | 1.62712700  | C          | 1.83145100  | 4.68601200  | 2.06029800  |
| C                    | -0.96981800 | -2.21237300 | 1.59421200  | C          | 1.57402900  | 3.31169000  | 2.12118200  |
| C                    | -2.86055700 | -1.23769000 | 2.74014400  | C          | 0.57132200  | 1.30625500  | 0.74742800  |
| C                    | -0.80310200 | -3.11886500 | 2.64360600  | C          | -0.22010900 | 1.40563700  | -0.52068200 |
| H                    | -0.28603600 | -2.23597900 | 0.75182600  | H          | 0.58009300  | 5.41923400  | -1.04587200 |
| C                    | -2.69907700 | -2.14630600 | 3.78353300  | H          | 1.70393100  | 6.49563500  | 0.89666300  |
|                      |             |             |             | H          | 2.31164600  | 5.17893400  | 2.90037500  |

|   |             |             |             |          |             |             |             |
|---|-------------|-------------|-------------|----------|-------------|-------------|-------------|
| H | 1.86282400  | 2.72875200  | 2.99064500  | H        | -3.46384900 | -6.33771900 | -1.21007100 |
| H | 0.17265300  | 0.68611700  | 1.53927400  | H        | -6.10961500 | -2.95459200 | -0.90961100 |
| N | -0.06698500 | 2.63594400  | -1.02164700 | H        | -5.77115500 | -5.41365000 | -1.06757600 |
| C | -0.48628000 | 3.12962200  | -2.33484400 | I        | 2.52339800  | 0.10273500  | 0.26974500  |
| H | -1.02077300 | 4.07245600  | -2.20709000 | I        | 5.85691200  | -1.85586800 | -0.36058600 |
| H | 0.40028200  | 3.29420100  | -2.95521700 |          |             |             |             |
| H | -1.13482400 | 2.40224200  | -2.81265400 | <b>9</b> |             |             |             |
| C | -0.68264300 | 0.23070200  | -1.36223700 | C        | -3.29376200 | 0.16743100  | 0.28924400  |
| O | -0.29812700 | 0.15549700  | -2.52823800 | C        | -2.92494400 | 0.28539600  | 1.64549400  |
| C | -1.51216700 | -0.72480900 | -0.63562700 | C        | -3.83201900 | 0.76804000  | 2.59558800  |
| C | -1.47011200 | -2.14939400 | -1.07316600 | C        | -5.10932300 | 1.12772100  | 2.15423500  |
| C | -2.15265900 | -0.17767900 | 0.48223500  | C        | -5.48147600 | 1.02133400  | 0.80624500  |
| C | -2.56316100 | -0.98051000 | 1.66509800  | C        | -4.56910800 | 0.53323800  | -0.13423900 |
| C | -1.86098400 | -2.13383900 | 2.06012000  | C        | -2.13872300 | -0.36667900 | -0.46217200 |
| C | -3.65548900 | -0.55341100 | 2.44224000  | C        | -0.95748900 | -0.31148800 | 0.55940400  |
| C | -2.25400800 | -2.84959400 | 3.19084700  | H        | -3.55473200 | 0.87089600  | 3.63963100  |
| H | -0.98575900 | -2.45381300 | 1.50369300  | H        | -5.82647500 | 1.50724400  | 2.87767700  |
| C | -4.05540700 | -1.27730800 | 3.56351100  | H        | -6.47864700 | 1.31646300  | 0.49354000  |
| H | -4.19269200 | 0.34423400  | 2.15295000  | H        | -4.85014800 | 0.43175900  | -1.17901200 |
| C | -3.35541900 | -2.42792600 | 3.94077000  | N        | -1.61582400 | -0.12503300 | 1.83064500  |
| H | -1.69437900 | -3.73098200 | 3.49164100  | C        | -0.89600700 | 0.01870000  | 3.08169500  |
| H | -4.90977800 | -0.94314100 | 4.14586100  | H        | -0.64181500 | 1.06456900  | 3.30461900  |
| H | -3.66189300 | -2.98777000 | 4.82033300  | H        | -1.50554200 | -0.37315600 | 3.90202100  |
| N | -2.25593300 | 1.17612300  | 0.63048400  | H        | 0.02703400  | -0.56317700 | 3.04357200  |
| C | -2.98866800 | 2.01177400  | -0.20339800 | C        | 0.03733000  | -1.52677500 | 0.58689300  |
| C | -2.96029100 | 3.39517100  | 0.09710900  | O        | -0.26570900 | -2.60448200 | 1.07179400  |
| C | -3.80125200 | 1.59207100  | -1.28560200 | C        | 1.30785500  | -1.05286900 | 0.08340000  |
| C | -3.69106900 | 4.31298500  | -0.65351400 | C        | 2.48460200  | -1.94474700 | -0.05334200 |
| H | -2.36201400 | 3.72397000  | 0.94190800  | C        | 1.20316100  | 0.31659400  | -0.13674700 |
| C | -4.53673600 | 2.51861300  | -2.02272400 | C        | 2.27393100  | 1.19833200  | -0.64980500 |
| H | -3.85673800 | 0.54057600  | -1.54448200 | C        | 2.97946600  | 0.83036900  | -1.80691400 |
| C | -4.48399600 | 3.88472000  | -1.72392000 | C        | 2.61368500  | 2.38716500  | 0.01821100  |
| H | -3.64798000 | 5.36859100  | -0.39564300 | C        | 4.00300500  | 1.64459500  | -2.29251800 |
| H | -5.16019600 | 2.16674000  | -2.84159700 | H        | 2.71289200  | -0.08018000 | -2.33496500 |
| H | -5.06017600 | 4.59874300  | -2.30579400 | C        | 3.64881700  | 3.18734600  | -0.46266100 |
| O | -0.42670400 | -2.62158600 | -1.52581800 | H        | 2.08299000  | 2.67251300  | 0.92090400  |
| C | -2.70080400 | -3.01453900 | -1.02529300 | C        | 4.34200400  | 2.82127300  | -1.62052500 |
| C | -2.52222400 | -4.40497100 | -1.13096800 | H        | 4.53555200  | 1.35711100  | -3.19465300 |
| C | -4.00529500 | -2.50380100 | -0.94397800 | H        | 3.91436700  | 4.09768500  | 0.06743700  |
| C | -3.61782100 | -5.26428200 | -1.13907100 | H        | 5.14365100  | 3.45097400  | -1.99656600 |
| H | -1.51261400 | -4.79596900 | -1.20422600 | N        | -0.03458100 | 0.81366800  | 0.17096200  |
| C | -5.10466300 | -3.36417300 | -0.96456300 | C        | -0.52297900 | 2.10143800  | -0.23762900 |
| H | -4.17085900 | -1.43479300 | -0.87447700 | C        | -0.97249100 | 3.00352200  | 0.73340700  |
| C | -4.91454700 | -4.74487900 | -1.05720500 | C        | -0.56650700 | 2.45103500  | -1.59446700 |

|   |             |             |             |
|---|-------------|-------------|-------------|
| C | -1.47337200 | 4.24776500  | 0.34519700  |
| H | -0.91786300 | 2.73736600  | 1.78362800  |
| C | -1.05765300 | 3.70111400  | -1.97311000 |
| H | -0.21281600 | 1.74933700  | -2.34367900 |
| C | -1.51609300 | 4.59976300  | -1.00608000 |
| H | -1.82117900 | 4.94474300  | 1.10254100  |
| H | -1.08602900 | 3.96862200  | -3.02572000 |
| H | -1.90142400 | 5.57077200  | -1.30448300 |
| O | 2.35508700  | -3.04272700 | -0.59338800 |
| C | 3.81404300  | -1.54992200 | 0.52003200  |
| C | 4.97150900  | -2.16112200 | 0.00930700  |
| C | 3.93035100  | -0.65779300 | 1.59720700  |
| C | 6.22174400  | -1.86971000 | 0.54956700  |
| H | 4.87507400  | -2.86059500 | -0.81519400 |
| C | 5.18183900  | -0.37949000 | 2.14963800  |
| H | 3.04205200  | -0.19803700 | 2.01876300  |
| C | 6.32902400  | -0.97887300 | 1.62359900  |
| H | 7.11259400  | -2.33719400 | 0.13868200  |
| H | 5.26040800  | 0.30329200  | 2.99130000  |
| H | 7.30347000  | -0.75578600 | 2.05004100  |
| H | -1.89943500 | 0.11080600  | -1.40573700 |
| I | -2.65393700 | -2.45858500 | -1.32229800 |

## 10

|   |             |             |             |
|---|-------------|-------------|-------------|
| C | -3.48231300 | -0.59021800 | 0.44685800  |
| C | -3.07646100 | -0.73717700 | 1.81468600  |
| C | -3.96966700 | -1.06521800 | 2.82079700  |
| C | -5.32928300 | -1.27508500 | 2.48154900  |
| C | -5.74251500 | -1.15663000 | 1.15583000  |
| C | -4.83315000 | -0.81703900 | 0.13521300  |
| C | -2.33774700 | -0.15012000 | -0.28276000 |
| C | -1.12447200 | -0.38735900 | 0.57096300  |
| H | -3.63464000 | -1.19051400 | 3.84752100  |
| H | -6.03848800 | -1.54856900 | 3.25889500  |
| H | -6.78332600 | -1.34141000 | 0.89598800  |
| H | -5.16957500 | -0.76118400 | -0.89780300 |
| N | -1.70443300 | -0.47979500 | 1.90751100  |
| C | -0.91350700 | -0.91920100 | 3.04079700  |
| H | -1.36297700 | -0.55105700 | 3.96878200  |
| H | -0.82790000 | -2.01431600 | 3.10581800  |
| H | 0.09127800  | -0.49273700 | 2.97020500  |
| C | -0.20552100 | -1.61696800 | 0.23396200  |
| O | -0.61807900 | -2.76732600 | 0.31850500  |
| C | 1.12638900  | -1.12228000 | -0.06734200 |

|   |             |             |             |
|---|-------------|-------------|-------------|
| C | 2.24597900  | -2.01219600 | -0.41702400 |
| C | 1.10847700  | 0.27049800  | 0.07763700  |
| C | 2.24322300  | 1.18094800  | -0.20499100 |
| C | 2.94493200  | 1.06587500  | -1.41568100 |
| C | 2.64135900  | 2.15003000  | 0.73114700  |
| C | 4.02137200  | 1.91148900  | -1.68766200 |
| H | 2.63532800  | 0.32783800  | -2.14939300 |
| C | 3.72779500  | 2.98118300  | 0.46179800  |
| H | 2.11123200  | 2.24014400  | 1.67414300  |
| C | 4.41756400  | 2.86733100  | -0.74922400 |
| H | 4.55026800  | 1.82129300  | -2.63243500 |
| H | 4.03574300  | 3.71851400  | 1.19800600  |
| H | 5.25968500  | 3.52108500  | -0.95956700 |
| N | -0.09214200 | 0.74784400  | 0.49154600  |
| C | -0.51634800 | 2.10977000  | 0.43082400  |
| C | -1.01908400 | 2.71707900  | 1.58895300  |
| C | -0.47291200 | 2.83203100  | -0.76974300 |
| C | -1.46872600 | 4.03863700  | 1.54461400  |
| H | -1.05028500 | 2.15569100  | 2.51664500  |
| C | -0.91015600 | 4.15664300  | -0.80334500 |
| H | -0.09988900 | 2.35428000  | -1.67005800 |
| C | -1.41143500 | 4.76372600  | 0.35183700  |
| H | -1.85579800 | 4.50303600  | 2.44771100  |
| H | -0.86826700 | 4.71088000  | -1.73728000 |
| H | -1.75576000 | 5.79392000  | 0.32176500  |
| O | 2.07163000  | -2.96400800 | -1.18332800 |
| C | 3.60089900  | -1.82961800 | 0.21473000  |
| C | 4.72354200  | -2.34707100 | -0.45263100 |
| C | 3.77311700  | -1.23955500 | 1.47621800  |
| C | 5.99274800  | -2.25322500 | 0.11446100  |
| H | 4.58474800  | -2.81786900 | -1.42095400 |
| C | 5.04221400  | -1.16133400 | 2.05344900  |
| H | 2.91207900  | -0.85997400 | 2.01731000  |
| C | 6.15497100  | -1.66063500 | 1.37172700  |
| H | 6.85552400  | -2.64426300 | -0.41859900 |
| H | 5.16121400  | -0.71266700 | 3.03618000  |
| H | 7.14346200  | -1.59213800 | 1.81842600  |
| I | -2.20101400 | -0.65795300 | -2.42777300 |

## TS2

|   |            |             |             |
|---|------------|-------------|-------------|
| C | 3.26829700 | -1.42291600 | 0.10224000  |
| C | 2.87370600 | -1.83196500 | -1.20534100 |
| C | 3.73820400 | -2.51942000 | -2.05747600 |
| C | 5.05331000 | -2.75923800 | -1.62379900 |



|   |             |             |             |           |             |             |             |
|---|-------------|-------------|-------------|-----------|-------------|-------------|-------------|
| C | 5.48128900  | -2.31982200 | -0.36600000 | C         | -4.00849600 | -1.49199900 | -0.89247500 |
| C | 4.59735900  | -1.65478300 | 0.49350500  | C         | -6.28832000 | -1.81411600 | 0.69259700  |
| C | 2.11220400  | -0.95447400 | 0.85017200  | H         | -4.91201300 | -1.99742600 | 2.34513300  |
| C | 0.96705300  | -0.92533500 | -0.23274400 | C         | -5.27489900 | -1.48071500 | -1.48028800 |
| H | 3.41797600  | -2.83703400 | -3.04600500 | H         | -3.12534200 | -1.38351900 | -1.51389900 |
| H | 5.74189800  | -3.28670800 | -2.27945500 | C         | -6.41639200 | -1.63399600 | -0.68934200 |
| H | 6.50556300  | -2.50074000 | -0.04870300 | H         | -7.17420900 | -1.93529300 | 1.31041400  |
| H | 4.93933400  | -1.31310700 | 1.46774800  | H         | -5.36969400 | -1.35376900 | -2.55540900 |
| N | 1.57140100  | -1.42720800 | -1.45763300 | H         | -7.40204300 | -1.61689100 | -1.14697800 |
| C | 0.77053800  | -1.97751500 | -2.53406600 | I         | 2.67607200  | 1.13250700  | 1.97327800  |
| H | 1.30382600  | -1.88303900 | -3.48666400 |           |             |             |             |
| H | 0.52356800  | -3.03726000 | -2.37580400 | <b>11</b> |             |             |             |
| H | -0.16031900 | -1.40964600 | -2.61882000 | C         | -3.65917000 | -0.89545100 | -0.80861900 |
| C | -0.09830500 | -1.92249300 | 0.33592300  | C         | -3.55243000 | -1.22586600 | 0.59598500  |
| O | 0.11277400  | -3.12148600 | 0.46431700  | C         | -4.62040200 | -1.83072400 | 1.29461100  |
| C | -1.32222800 | -1.17005700 | 0.55306200  | C         | -5.79026100 | -2.04547300 | 0.58910800  |
| C | -2.52906000 | -1.77278300 | 1.16189900  | C         | -5.94148600 | -1.70265100 | -0.78648200 |
| C | -1.13281100 | 0.10178900  | 0.02331000  | C         | -4.89414400 | -1.13791600 | -1.47759300 |
| C | -2.17694000 | 1.15318500  | -0.04121500 | C         | -2.47065600 | -0.33722800 | -1.31402200 |
| C | -2.84401500 | 1.53961600  | 1.13150100  | C         | -1.55549900 | -0.47900700 | -0.13388000 |
| C | -2.54055700 | 1.73801300  | -1.26549100 | H         | -4.53687100 | -2.10604100 | 2.34094700  |
| C | -3.84916000 | 2.50720400  | 1.08231600  | H         | -6.63427700 | -2.49668900 | 1.10503700  |
| H | -2.56391400 | 1.09462100  | 2.08163700  | H         | -6.88830700 | -1.90323600 | -1.27853000 |
| C | -3.55674400 | 2.69131500  | -1.31144100 | H         | -4.98358100 | -0.88022300 | -2.52972800 |
| H | -2.03760900 | 1.43761500  | -2.17951500 | N         | -2.33720900 | -0.85285800 | 1.05203800  |
| C | -4.20913700 | 3.08293200  | -0.13806500 | C         | -1.74911000 | -1.25489300 | 2.31971300  |
| H | -4.35131700 | 2.80713300  | 1.99790800  | H         | -2.47000400 | -1.09195000 | 3.12532100  |
| H | -3.83862500 | 3.13008800  | -2.26461600 | H         | -1.45255600 | -2.31152400 | 2.31313400  |
| H | -4.99509500 | 3.83235500  | -0.17650100 | H         | -0.87000300 | -0.63564700 | 2.51275400  |
| N | 0.13746900  | 0.30075400  | -0.45393200 | C         | -0.58805400 | -1.69103600 | -0.53991000 |
| C | 0.63231700  | 1.53097700  | -0.99557600 | O         | -0.96894400 | -2.84193500 | -0.62931800 |
| C | 1.32061900  | 1.53986800  | -2.21752400 | C         | 0.73465300  | -1.10600300 | -0.62191100 |
| C | 0.41678300  | 2.74626000  | -0.32570900 | C         | 1.92289400  | -1.92657700 | -0.96521600 |
| C | 1.79235900  | 2.74289000  | -2.74954600 | C         | 0.65269100  | 0.23926700  | -0.27232200 |
| H | 1.48633200  | 0.61434000  | -2.75208900 | C         | 1.75730100  | 1.21903500  | -0.27544600 |
| C | 0.86690700  | 3.94466000  | -0.87681000 | C         | 2.61860900  | 1.29867700  | -1.38215100 |
| H | -0.09553000 | 2.75207200  | 0.62870100  | C         | 1.96571500  | 2.06691900  | 0.82603600  |
| C | 1.56386700  | 3.95017700  | -2.08839000 | C         | 3.66559700  | 2.22035600  | -1.38920000 |
| H | 2.32808300  | 2.72981000  | -3.69504900 | H         | 2.45347900  | 0.65774500  | -2.24276300 |
| H | 0.68680700  | 4.87501400  | -0.34472100 | C         | 3.02431500  | 2.97334300  | 0.81955700  |
| H | 1.92355100  | 4.88471100  | -2.51024200 | H         | 1.31300100  | 2.00153400  | 1.69074700  |
| O | -2.42576400 | -2.42412600 | 2.20256800  | C         | 3.87262200  | 3.05595700  | -0.28884500 |
| C | -3.87071200 | -1.66978900 | 0.49260400  | H         | 4.31948900  | 2.28399700  | -2.25431100 |
| C | -5.02390200 | -1.84348800 | 1.27634400  | H         | 3.18648400  | 3.61579000  | 1.68038500  |

|   |             |             |             |   |             |             |             |
|---|-------------|-------------|-------------|---|-------------|-------------|-------------|
| H | 4.69197200  | 3.76961000  | -0.29392400 | C | -0.78174100 | -1.60366500 | -0.55929400 |
| N | -0.61470500 | 0.61748700  | 0.08442400  | O | -1.16461800 | -2.74495500 | -0.48269200 |
| C | -1.11525600 | 1.96779400  | 0.07384000  | C | 0.56181300  | -1.05689000 | -0.62060500 |
| C | -1.75139300 | 2.45776300  | 1.21855000  | C | 1.68927500  | -1.96594100 | -0.97746400 |
| C | -1.00811300 | 2.76350600  | -1.07307400 | C | 0.61158500  | 0.26868100  | -0.23369300 |
| C | -2.27908000 | 3.75113500  | 1.21514600  | C | 1.80594500  | 1.13637100  | -0.25760200 |
| H | -1.82404300 | 1.83409400  | 2.10397300  | C | 2.64600200  | 1.14621100  | -1.38338100 |
| C | -1.52496300 | 4.05952500  | -1.06256000 | C | 2.12188300  | 1.94673900  | 0.84705400  |
| H | -0.52837500 | 2.36678600  | -1.96191600 | C | 3.78105500  | 1.95652400  | -1.40403000 |
| C | -2.16332100 | 4.55466300  | 0.07845000  | H | 2.39759300  | 0.53909900  | -2.24859600 |
| H | -2.77212600 | 4.13127500  | 2.10550600  | C | 3.26449800  | 2.74393600  | 0.82542200  |
| H | -1.43714900 | 4.67801200  | -1.95150000 | H | 1.48567700  | 1.93422900  | 1.72632900  |
| H | -2.56858900 | 5.56271800  | 0.08056000  | C | 4.09369200  | 2.75410600  | -0.30052600 |
| O | 1.85754500  | -2.72650000 | -1.89728400 | H | 4.41875600  | 1.96567300  | -2.28336000 |
| C | 3.17765300  | -1.83485100 | -0.14770400 | H | 3.50833300  | 3.35710700  | 1.68838000  |
| C | 4.38442500  | -2.25526400 | -0.73185400 | H | 4.98060400  | 3.38154700  | -0.31663600 |
| C | 3.17417600  | -1.42303100 | 1.19407400  | N | -0.59251600 | 0.78202100  | 0.19897600  |
| C | 5.56774000  | -2.24140200 | 0.00235900  | C | -0.94000000 | 2.18192500  | 0.03961600  |
| H | 4.37931600  | -2.58593600 | -1.76565800 | C | -1.39440900 | 2.89790200  | 1.14942800  |
| C | 4.35756900  | -1.42608600 | 1.93451700  | C | -0.86186800 | 2.79280600  | -1.21688500 |
| H | 2.24509800  | -1.12192500 | 1.66758000  | C | -1.76450500 | 4.23688700  | 1.00177100  |
| C | 5.55611400  | -1.82763800 | 1.33918200  | H | -1.44956800 | 2.41453500  | 2.11942600  |
| H | 6.49831600  | -2.55530200 | -0.46284700 | C | -1.22267500 | 4.13362600  | -1.35365700 |
| H | 4.34288600  | -1.11696300 | 2.97607300  | H | -0.52726600 | 2.21948700  | -2.07575000 |
| H | 6.47799800  | -1.82211800 | 1.91470800  | C | -1.67599400 | 4.85712500  | -0.24645400 |

### TS3

|   |             |             |             |           |             |             |             |
|---|-------------|-------------|-------------|-----------|-------------|-------------|-------------|
| C | -3.52989800 | -1.03408700 | -0.77974800 | H         | -2.11554100 | 4.79407800  | 1.86579600  |
| C | -3.63582200 | -1.01953000 | 0.64747500  | H         | -1.15680900 | 4.60977000  | -2.32796800 |
| C | -4.74243900 | -1.56263000 | 1.32136000  | H         | -1.96043600 | 5.89980900  | -0.35762700 |
| C | -5.75695100 | -2.09720700 | 0.53738300  | O         | 1.57537300  | -2.71356000 | -1.94602500 |
| C | -5.68514200 | -2.11770300 | -0.87610100 | C         | 2.92528400  | -2.01223700 | -0.13191300 |
| C | -4.57910400 | -1.59986100 | -1.53296000 | C         | 4.10625000  | -2.51309400 | -0.70534600 |
| C | -2.29116900 | -0.42835900 | -1.20032500 | C         | 2.92097500  | -1.65163000 | 1.22471700  |
| C | -1.68209000 | -0.15397200 | 0.05761200  | C         | 5.26660500  | -2.62809800 | 0.05585400  |
| H | -4.81059700 | -1.55907000 | 2.40493200  | H         | 4.10015100  | -2.80312500 | -1.75126800 |
| H | -6.63438900 | -2.51420500 | 1.02522200  | C         | 4.07977100  | -1.78520800 | 1.99127700  |
| H | -6.50416700 | -2.55243000 | -1.44199100 | H         | 2.00859600  | -1.28931800 | 1.68768400  |
| H | -4.51184700 | -1.62063300 | -2.61790300 | C         | 5.25489700  | -2.26525400 | 1.40746800  |
| N | -2.50978900 | -0.42724500 | 1.16631800  | H         | 6.17918300  | -3.00291200 | -0.39964400 |
| C | -2.11471000 | -0.45101600 | 2.56628800  | H         | 4.06434000  | -1.51548700 | 3.04368000  |
| H | -2.88565000 | 0.02049300  | 3.18297000  | H         | 6.15871800  | -2.36035900 | 2.00340000  |
| H | -1.95753800 | -1.47984200 | 2.91151300  | <b>4a</b> |             |             |             |
| H | -1.18410000 | 0.10750000  | 2.67763800  | C         | -2.63231500 | -2.29688100 | -0.25055600 |
|   |             |             |             | C         | -3.67966700 | -1.40851900 | 0.09809400  |

|   |             |             |             |
|---|-------------|-------------|-------------|
| C | -4.99465400 | -1.85707200 | 0.25879300  |
| C | -5.24112900 | -3.21805800 | 0.07405200  |
| C | -4.20876100 | -4.11231600 | -0.26579400 |
| C | -2.90149600 | -3.66194700 | -0.43143600 |
| C | -1.43867900 | -1.50304800 | -0.33984000 |
| C | -1.80455800 | -0.18196900 | -0.05315600 |
| H | -5.80720700 | -1.18400100 | 0.51162000  |
| H | -6.25511800 | -3.59043300 | 0.19289000  |
| H | -4.43754600 | -5.16589500 | -0.40305300 |
| H | -2.09637400 | -4.33843600 | -0.69712000 |
| N | -3.15592100 | -0.11423800 | 0.22889300  |
| C | -3.98633300 | 1.03387100  | 0.58887400  |
| H | -4.19290200 | 1.66571800  | -0.27929700 |
| H | -4.92957700 | 0.65575400  | 0.98207000  |
| H | -3.51234400 | 1.62805700  | 1.36889800  |
| C | -0.08674400 | -1.87839900 | -0.65060100 |
| O | 0.27780900  | -3.03937300 | -0.92935400 |
| C | 0.84413000  | -0.74545200 | -0.63002600 |
| C | 2.26818100  | -1.05405800 | -1.03645500 |
| C | 0.44526900  | 0.53993000  | -0.37022600 |
| C | 1.43252000  | 1.66493900  | -0.37796500 |
| C | 1.52742200  | 2.53089100  | -1.47763100 |
| C | 2.31712300  | 1.82310800  | 0.69876500  |
| C | 2.48648000  | 3.54417000  | -1.49339500 |
| H | 0.85792200  | 2.40402800  | -2.32297100 |
| C | 3.27466000  | 2.84024900  | 0.68101300  |
| H | 2.25527000  | 1.15048600  | 1.54929100  |
| C | 3.36024300  | 3.70300300  | -0.41359400 |
| H | 2.55410400  | 4.20709300  | -2.35180500 |
| H | 3.95287300  | 2.95483500  | 1.52224600  |
| H | 4.10665500  | 4.49276200  | -0.42836700 |
| N | -0.88729800 | 0.85087500  | -0.07049600 |
| C | -1.25015500 | 2.22385700  | 0.22889800  |
| C | -1.05926900 | 2.71886400  | 1.52098900  |
| C | -1.77422400 | 3.03348100  | -0.78034000 |
| C | -1.40987300 | 4.03982900  | 1.80607200  |
| H | -0.64926000 | 2.07338300  | 2.29152900  |
| C | -2.12523300 | 4.35272600  | -0.48593500 |
| H | -1.90734700 | 2.63278400  | -1.78046900 |
| C | -1.94500100 | 4.85573600  | 0.80506200  |
| H | -1.26686900 | 4.42850500  | 2.81024200  |
| H | -2.53652400 | 4.98566800  | -1.26701200 |
| H | -2.21829800 | 5.88271900  | 1.03060000  |
| O | 2.67785400  | -0.72249700 | -2.14267500 |

**12**

|   |             |             |             |
|---|-------------|-------------|-------------|
| C | 3.14913100  | -1.78596900 | -0.07583700 |
| C | 4.43613100  | -2.16365400 | -0.49543000 |
| C | 2.74014600  | -2.08427400 | 1.23369700  |
| C | 5.29524200  | -2.82923900 | 0.37482000  |
| H | 4.74610100  | -1.92698400 | -1.50825200 |
| C | 3.60268500  | -2.74895000 | 2.10622400  |
| H | 1.75094700  | -1.79324100 | 1.57256100  |
| C | 4.87957300  | -3.12303000 | 1.67863100  |
| H | 6.28800500  | -3.11959600 | 0.04159500  |
| H | 3.27928700  | -2.97458600 | 3.11867600  |
| H | 5.55036100  | -3.64103700 | 2.35898100  |
| C | 0.99212500  | 2.89454400  | 0.54689400  |
| C | 0.93081900  | 2.88397600  | -0.87746400 |
| C | 1.32995900  | 3.98540700  | -1.64728700 |
| C | 1.80821900  | 5.10435600  | -0.97052400 |
| C | 1.88679100  | 5.13109900  | 0.43894600  |
| C | 1.48415700  | 4.03954500  | 1.20117600  |
| C | 0.49225500  | 1.62378100  | 0.98618000  |
| C | 0.14264900  | 0.91049400  | -0.14392200 |
| H | 1.26922100  | 3.97023000  | -2.73153100 |
| H | 2.12609200  | 5.97434200  | -1.53922000 |
| H | 2.26633400  | 6.02159800  | 0.93344500  |
| H | 1.54333700  | 4.06934300  | 2.28654300  |
| N | 0.43513800  | 1.65740100  | -1.27724400 |
| C | 0.10175200  | 1.30692900  | -2.64808700 |
| H | -0.78622300 | 1.85237200  | -2.98616500 |
| H | 0.94240600  | 1.54260100  | -3.30706500 |
| H | -0.09836800 | 0.23665400  | -2.71132100 |
| C | -0.24430300 | -0.53759800 | -0.21254300 |
| O | 0.75193500  | -1.34851200 | -0.39989200 |
| C | -1.56177900 | -0.96415400 | -0.05794200 |
| C | -1.83755500 | -2.43026400 | 0.03501900  |
| C | -2.67120200 | -0.00662900 | 0.05732600  |
| C | -3.80815400 | -0.39484900 | 0.96378700  |
| C | -3.54812800 | -0.91771400 | 2.24125200  |
| C | -5.14370600 | -0.25828100 | 0.54828100  |
| C | -4.59735600 | -1.27573500 | 3.09067500  |
| H | -2.52098900 | -1.03256100 | 2.57457100  |
| C | -6.19026400 | -0.63234900 | 1.39027000  |
| H | -5.36109000 | 0.12663000  | -0.44321000 |
| C | -5.92081000 | -1.13733000 | 2.66647800  |
| H | -4.37906000 | -1.66606200 | 4.08121600  |

|           |             |             |             |   |             |             |             |
|-----------|-------------|-------------|-------------|---|-------------|-------------|-------------|
| H         | -7.21747300 | -0.53255000 | 1.04953800  | H | -1.12141900 | 0.05830400  | -2.06839100 |
| H         | -6.73801500 | -1.42414900 | 3.32301000  | N | -3.02055500 | -1.88587400 | -0.17957300 |
| N         | -2.62438400 | 1.11059100  | -0.60396500 | C | -3.35908000 | -2.81185700 | 0.89636300  |
| C         | -3.45386900 | 2.21465100  | -0.36402500 | H | -4.07533600 | -2.34497200 | 1.58019100  |
| C         | -4.08081700 | 2.83687000  | -1.46170000 | H | -3.80920900 | -3.72059000 | 0.48125600  |
| C         | -3.58238800 | 2.80922100  | 0.90771200  | H | -2.45469700 | -3.08089100 | 1.43360700  |
| C         | -4.84441500 | 3.99002700  | -1.28570900 | C | -0.49528700 | -1.81960400 | 0.05332000  |
| H         | -3.96400500 | 2.39587900  | -2.44847400 | O | -0.38714800 | -2.84162700 | 0.73312100  |
| C         | -4.33346500 | 3.97372500  | 1.07213400  | C | 0.74412500  | -1.03028600 | -0.30056500 |
| H         | -3.07715700 | 2.36043800  | 1.75785900  | C | 1.74468800  | -1.87235400 | -1.03331300 |
| C         | -4.97601400 | 4.56772400  | -0.01820200 | C | 0.92392000  | 0.29920500  | 0.00342800  |
| H         | -5.33109400 | 4.44556600  | -2.14477500 | C | 2.01559600  | 1.10644700  | -0.60366500 |
| H         | -4.41538300 | 4.41939900  | 2.06076400  | C | 2.26800100  | 1.04901500  | -1.98379600 |
| H         | -5.56143700 | 5.47334300  | 0.11538000  | C | 2.81038600  | 1.94090700  | 0.20205900  |
| O         | -1.16810300 | -3.19149600 | 0.73185600  | C | 3.30119500  | 1.80117800  | -2.54524600 |
| C         | -2.96112200 | -3.00240800 | -0.79251700 | H | 1.64255100  | 0.43129500  | -2.62129100 |
| C         | -3.50731500 | -4.24295400 | -0.42372400 | C | 3.84805100  | 2.68213200  | -0.35851300 |
| C         | -3.43151400 | -2.37087100 | -1.95492600 | H | 2.61619900  | 1.99321400  | 1.26916700  |
| C         | -4.51597400 | -4.82892400 | -1.18530600 | C | 4.09505600  | 2.61533100  | -1.73433300 |
| H         | -3.13164500 | -4.73389600 | 0.46861800  | H | 3.48115300  | 1.75537500  | -3.61574300 |
| C         | -4.43188500 | -2.96524200 | -2.72729500 | H | 4.46543400  | 3.31226300  | 0.27589800  |
| H         | -3.00669100 | -1.42163000 | -2.26592500 | H | 4.90081800  | 3.19896900  | -2.17134800 |
| C         | -4.98029500 | -4.19075800 | -2.34124000 | N | 0.12096800  | 0.96225500  | 0.92825900  |
| H         | -4.94024100 | -5.78273900 | -0.88267100 | C | -0.44147000 | 0.35877900  | 2.09284300  |
| H         | -4.78108700 | -2.47188800 | -3.63049300 | C | -1.81503000 | 0.37078300  | 2.36988300  |
| H         | -5.76411200 | -4.64899200 | -2.93873700 | C | 0.44332900  | -0.21605700 | 3.02187000  |
| H         | 0.39072800  | 1.27463800  | 2.00542300  | C | -2.29527800 | -0.20021500 | 3.55025800  |
| Zn        | 2.64264800  | -0.60104700 | 0.06931600  | H | -2.50495800 | 0.82660900  | 1.66806100  |
| I         | 3.93567700  | -0.89578400 | 2.70188800  | C | -0.04766100 | -0.80420900 | 4.18628000  |
| I         | 4.64228900  | -0.88102200 | -2.06784600 | H | 1.51080200  | -0.19197400 | 2.82759700  |
| <b>13</b> |             |             |             | C | -1.41860400 | -0.79709300 | 4.45939000  |
| C         | -3.30776400 | -0.41171000 | -1.88988700 | H | -3.36237700 | -0.17891700 | 3.75438400  |
| C         | -3.96466100 | -1.30489600 | -0.99147800 | H | 0.64884500  | -1.24902400 | 4.89197700  |
| C         | -5.35831800 | -1.48684400 | -1.01512600 | H | -1.79764700 | -1.24159100 | 5.37528500  |
| C         | -6.08027600 | -0.76728500 | -1.95771400 | O | 1.34714600  | -2.59003100 | -1.95210000 |
| C         | -5.44565000 | 0.11907500  | -2.86253500 | C | 3.18481200  | -1.91352900 | -0.62438000 |
| C         | -4.07206100 | 0.30205000  | -2.83788100 | C | 4.13620400  | -2.34569300 | -1.56385400 |
| C         | -1.92305400 | -0.47170300 | -1.57450500 | C | 3.59667700  | -1.62475200 | 0.68515500  |
| C         | -1.76743500 | -1.37391400 | -0.53012100 | C | 5.47757300  | -2.45963000 | -1.20759200 |
| H         | -5.85315200 | -2.16612300 | -0.32804600 | H | 3.80988300  | -2.58325800 | -2.57153700 |
| H         | -7.15931300 | -0.88835300 | -2.00461900 | C | 4.93845600  | -1.75783900 | 1.04645900  |
| H         | -6.05044300 | 0.66106300  | -3.58454100 | H | 2.86495600  | -1.32304600 | 1.42705400  |
| H         | -3.58783800 | 0.98405200  | -3.53213800 | C | 5.88145200  | -2.16663200 | 0.10022000  |
|           |             |             |             | H | 6.20898700  | -2.78035100 | -1.94451600 |

|            |             |             |             |   |             |             |             |
|------------|-------------|-------------|-------------|---|-------------|-------------|-------------|
| H          | 5.24610700  | -1.54357500 | 2.06631900  | H | 1.47537200  | 2.20893900  | 1.66038100  |
| H          | 6.92729300  | -2.26119000 | 0.38025100  | C | 3.36199400  | 2.68424600  | -1.69451300 |
| I          | -0.67239300 | 2.87167000  | 0.36234000  | H | 2.27354400  | 0.97338400  | -2.39497500 |
| <b>TS5</b> |             |             |             | C | 3.58788200  | 3.56147800  | -0.63203700 |
| C          | -3.34328300 | -0.81932500 | -1.65535000 | H | 3.06776700  | 4.06365700  | 1.40235700  |
| C          | -3.62878700 | -1.48529200 | -0.42677000 | H | 3.87278400  | 2.82895200  | -2.64227300 |
| C          | -4.93795500 | -1.74478300 | -0.00867800 | H | 4.28592500  | 4.38651600  | -0.74394800 |
| C          | -5.97735900 | -1.33036500 | -0.84222000 | N | -0.44432100 | 0.38043800  | 0.42171200  |
| C          | -5.71753700 | -0.66863100 | -2.06024000 | C | -0.49416500 | 0.25859500  | 1.84661400  |
| C          | -4.41383300 | -0.40753200 | -2.47232900 | C | -1.74165300 | 0.38299200  | 2.49246200  |
| C          | -1.92241500 | -0.73203100 | -1.75319000 | C | 0.62632600  | -0.11793500 | 2.61087700  |
| C          | -1.38538100 | -1.29721000 | -0.59343800 | C | -1.85837300 | 0.13034400  | 3.85422100  |
| H          | -5.14317700 | -2.25976500 | 0.92528500  | H | -2.61265100 | 0.68941900  | 1.92488600  |
| H          | -7.00525000 | -1.52616900 | -0.54833400 | C | 0.49429600  | -0.38602400 | 3.97485100  |
| H          | -6.55106300 | -0.35910900 | -2.68578300 | H | 1.59972500  | -0.21424900 | 2.14662600  |
| H          | -4.22231400 | 0.10449500  | -3.41230800 | C | -0.74298800 | -0.26064500 | 4.60559900  |
| H          | -1.34463500 | -0.33332500 | -2.57533400 | H | -2.82738700 | 0.23895400  | 4.33336200  |
| N          | -2.42361500 | -1.79251900 | 0.18702600  | H | 1.37212500  | -0.68230500 | 4.54231000  |
| C          | -2.30960200 | -2.68519700 | 1.33250100  | H | -0.83980300 | -0.45635400 | 5.66959700  |
| H          | -3.03388500 | -2.39555100 | 2.09805100  | O | 2.15359500  | -1.74165200 | -2.65373600 |
| H          | -2.49903800 | -3.72408300 | 1.03811700  | C | 3.60952200  | -1.59805300 | -0.78367200 |
| H          | -1.31066600 | -2.61706700 | 1.76030900  | C | 4.77371400  | -1.70221700 | -1.56545800 |
| C          | -0.02999300 | -1.92049400 | -0.56662900 | C | 3.70386100  | -1.69992900 | 0.61278300  |
| O          | 0.13636800  | -3.12835800 | -0.44418600 | C | 6.01232700  | -1.88105700 | -0.95685100 |
| C          | 1.08142200  | -0.95868800 | -0.72626200 | H | 4.69210600  | -1.63149800 | -2.64548700 |
| C          | 2.30043500  | -1.44252300 | -1.47250500 | C | 4.94497800  | -1.89554500 | 1.21934600  |
| C          | 0.84933000  | 0.28122500  | -0.21108700 | H | 2.80744100  | -1.65753000 | 1.22182700  |
| C          | 1.78356400  | 1.42309400  | -0.33540200 | C | 6.09959900  | -1.97861000 | 0.43722400  |
| C          | 2.00132400  | 2.32953100  | 0.72029300  | H | 6.91082300  | -1.94666300 | -1.56411100 |
| C          | 2.46917400  | 1.62300800  | -1.54886700 | H | 5.00981800  | -1.98496700 | 2.30000500  |
| C          | 2.90257600  | 3.38114400  | 0.57347300  | H | 7.06679900  | -2.12215600 | 0.91137400  |
|            |             |             |             | I | -1.46948200 | 2.32074900  | -0.30279600 |

## 6. Copies of Spectra of New Products

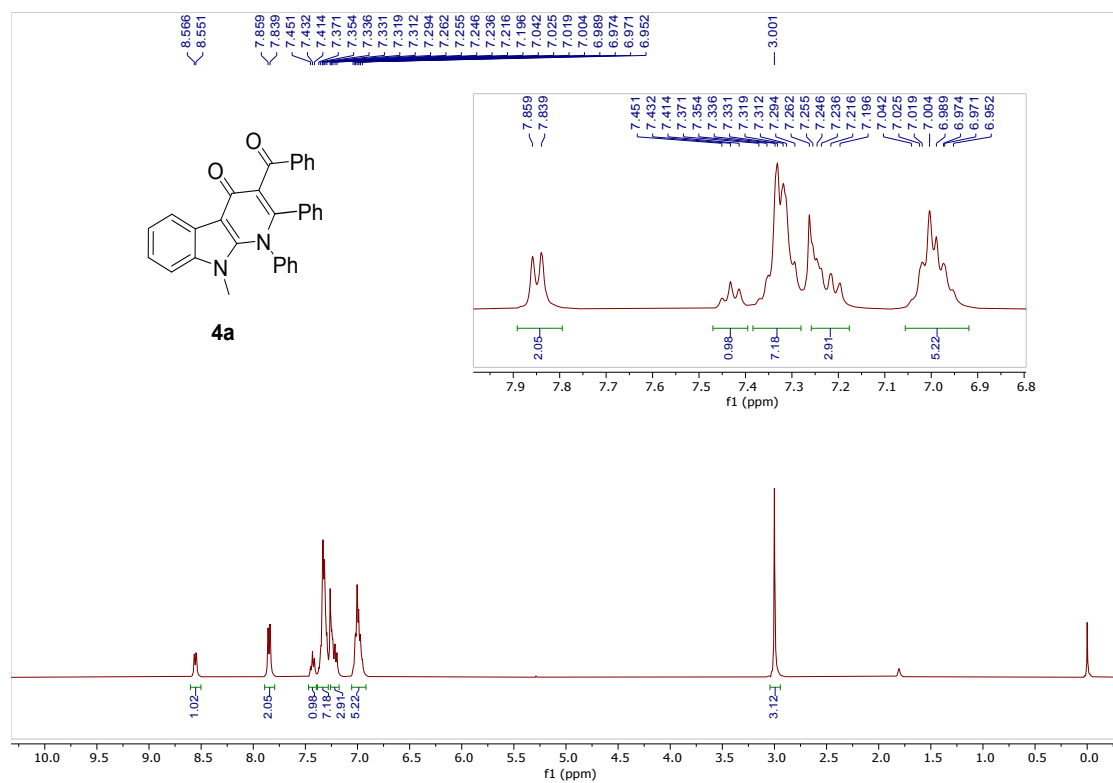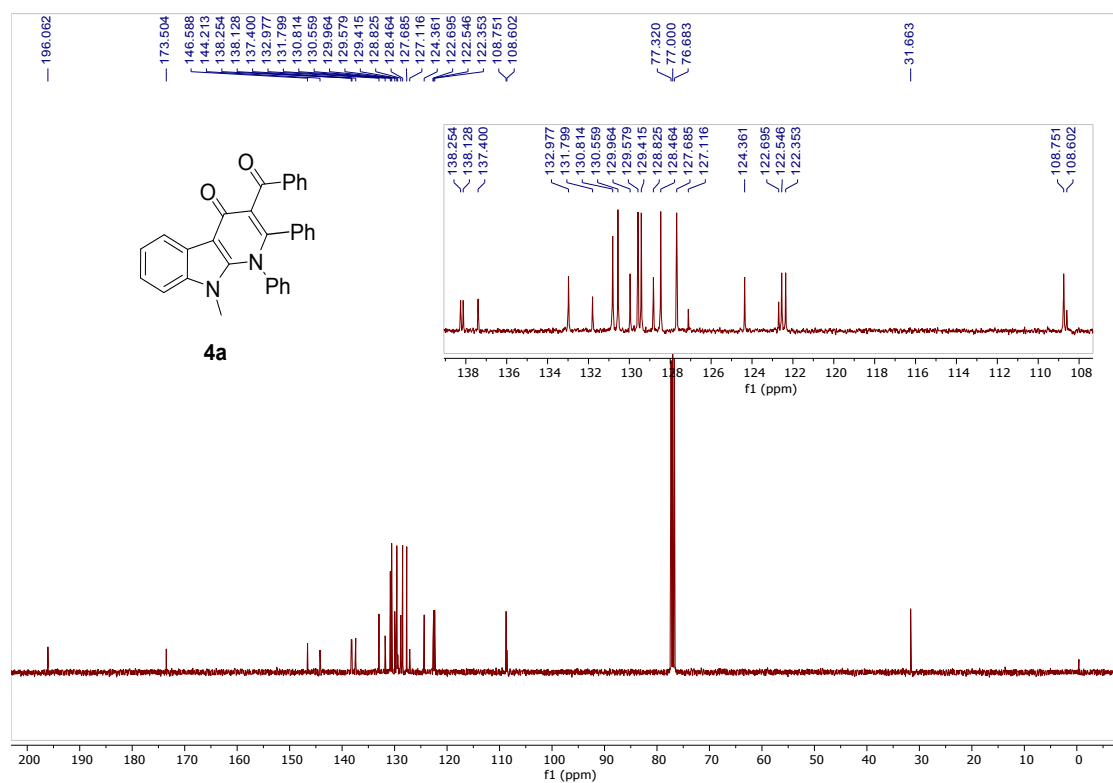

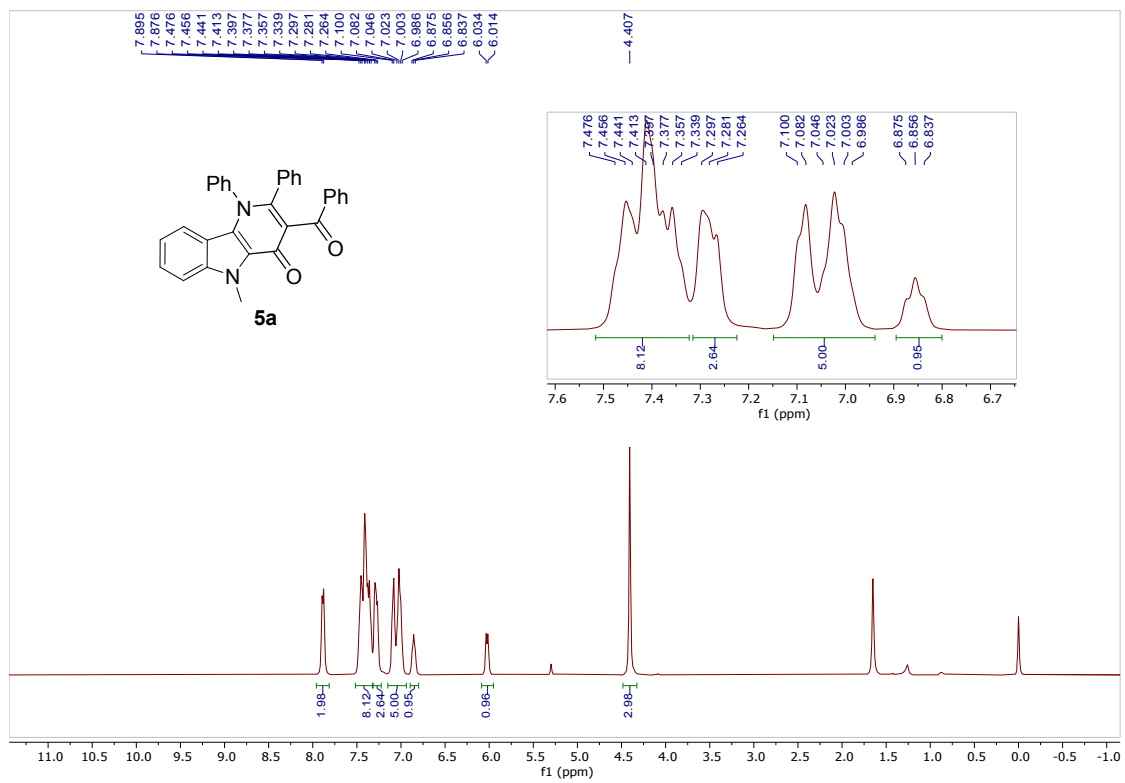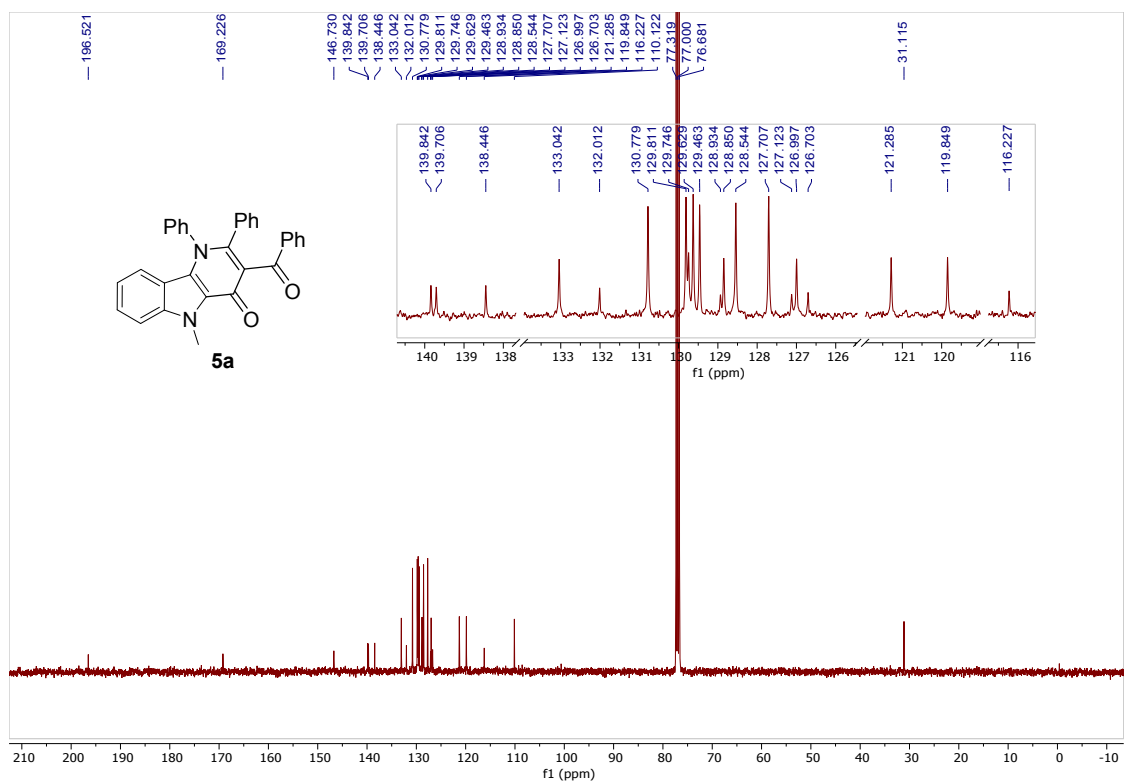

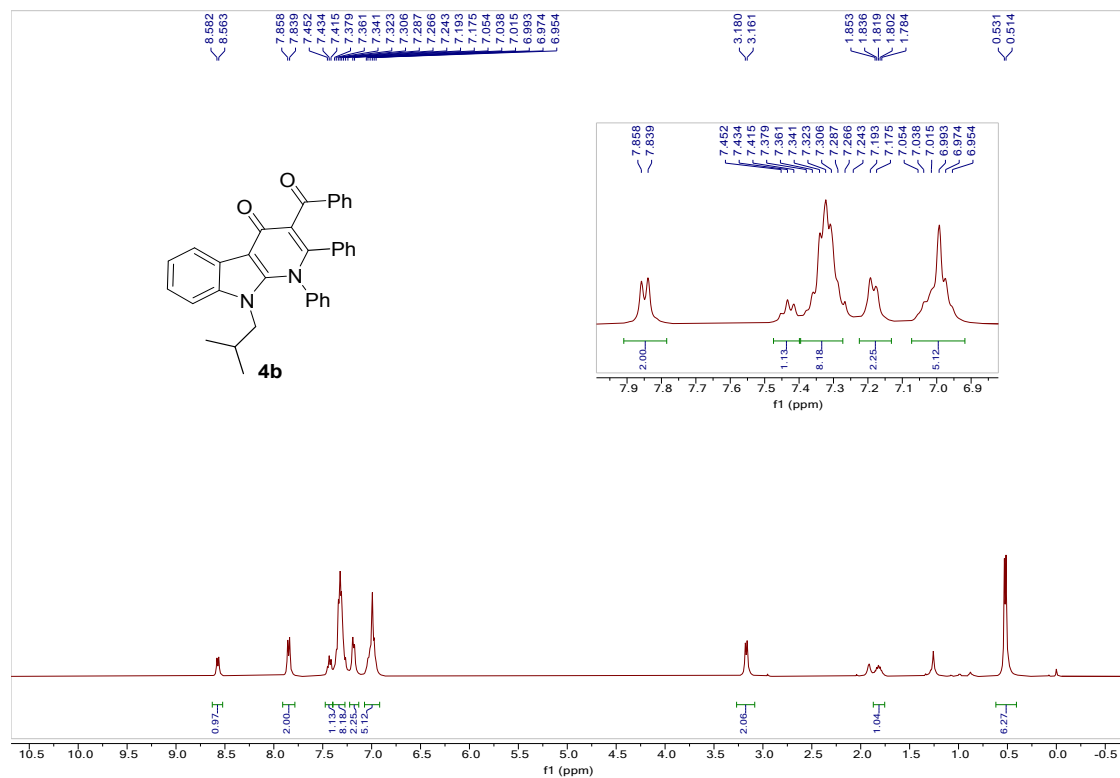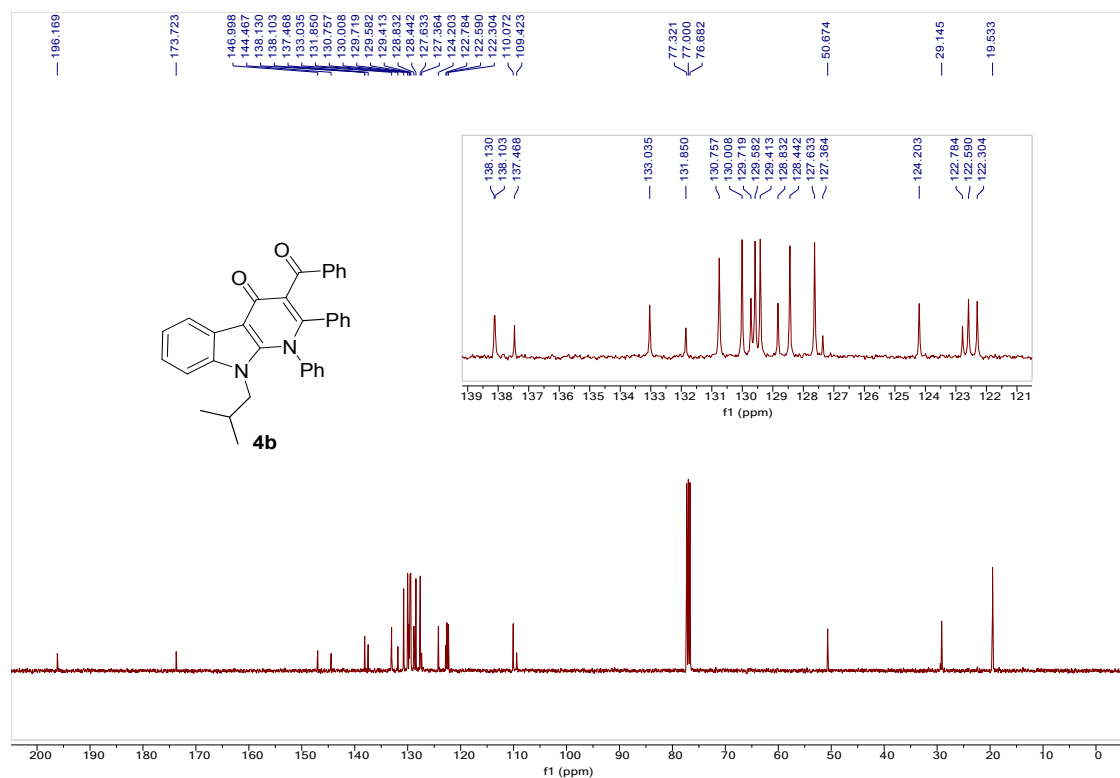



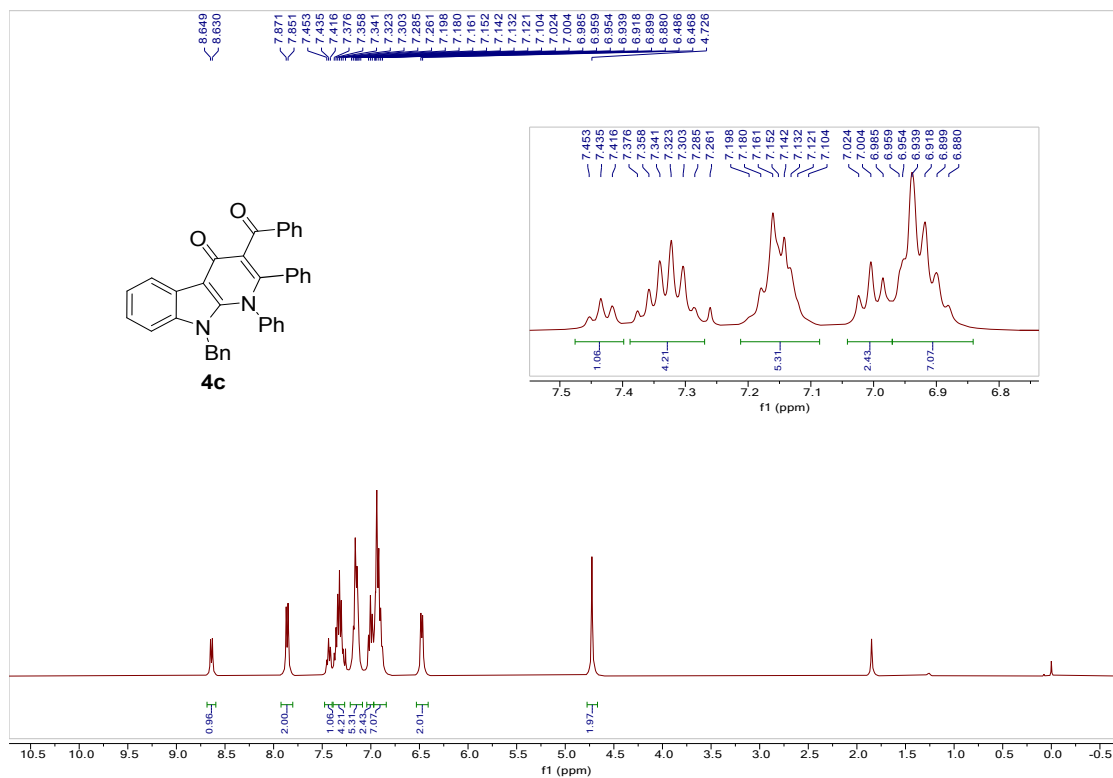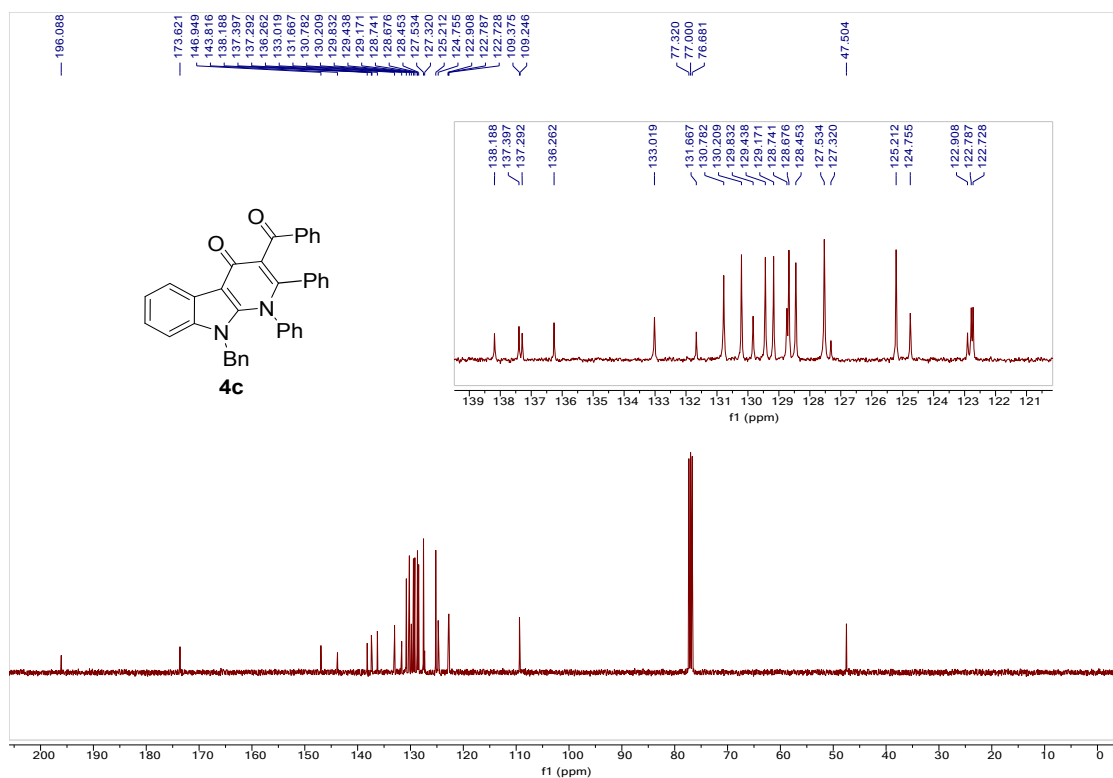

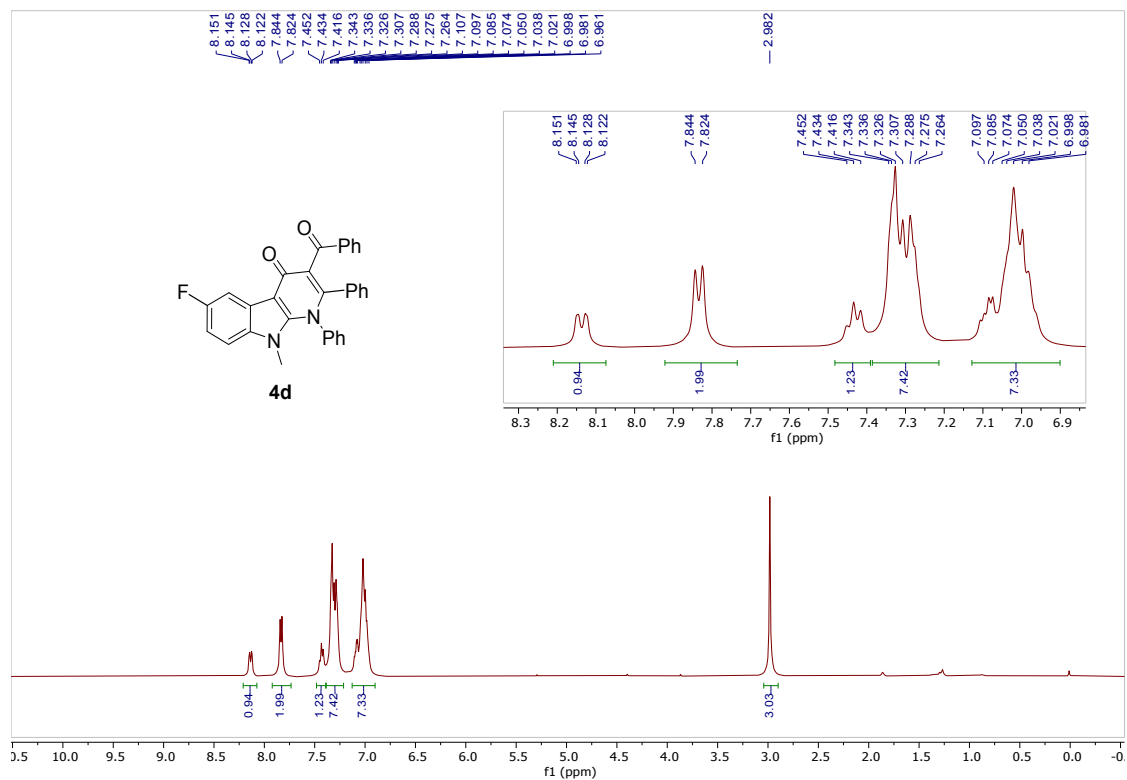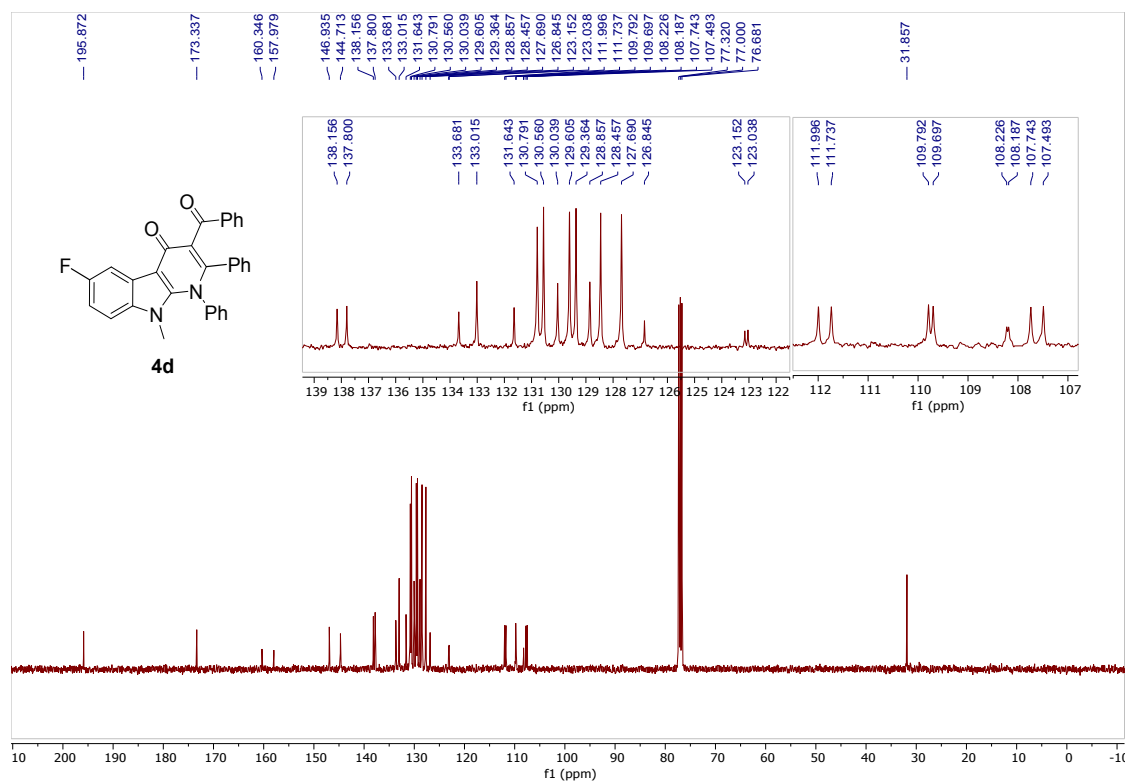

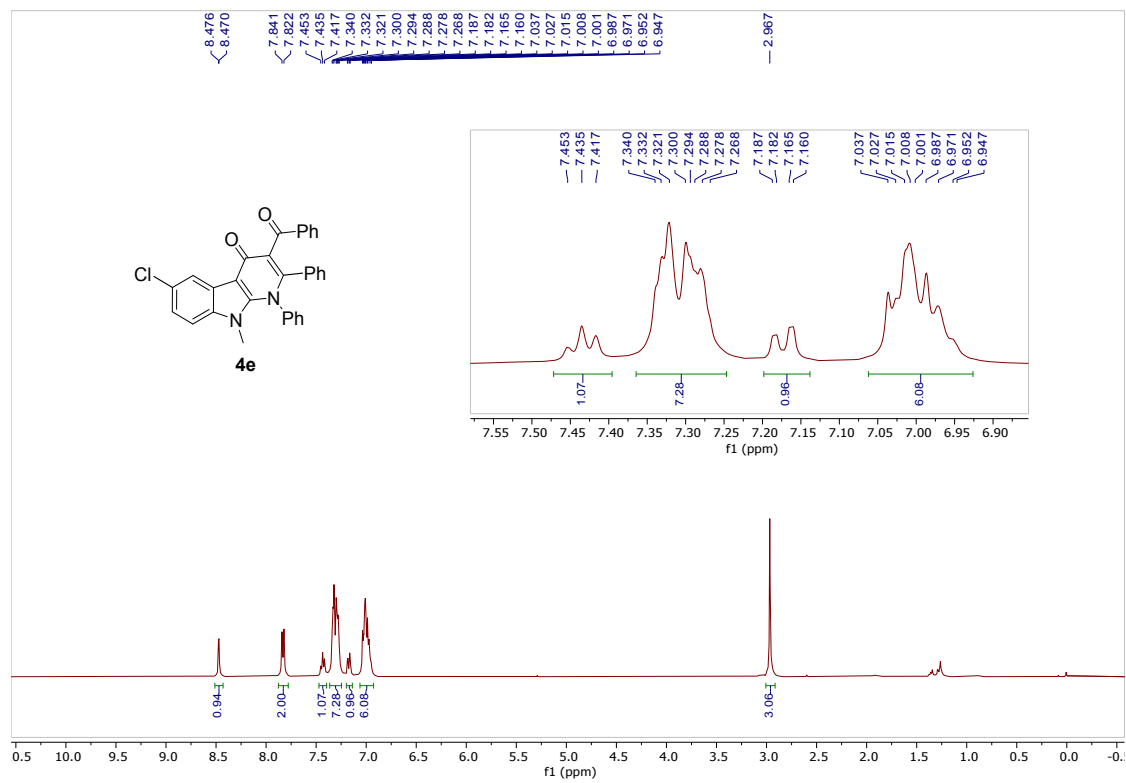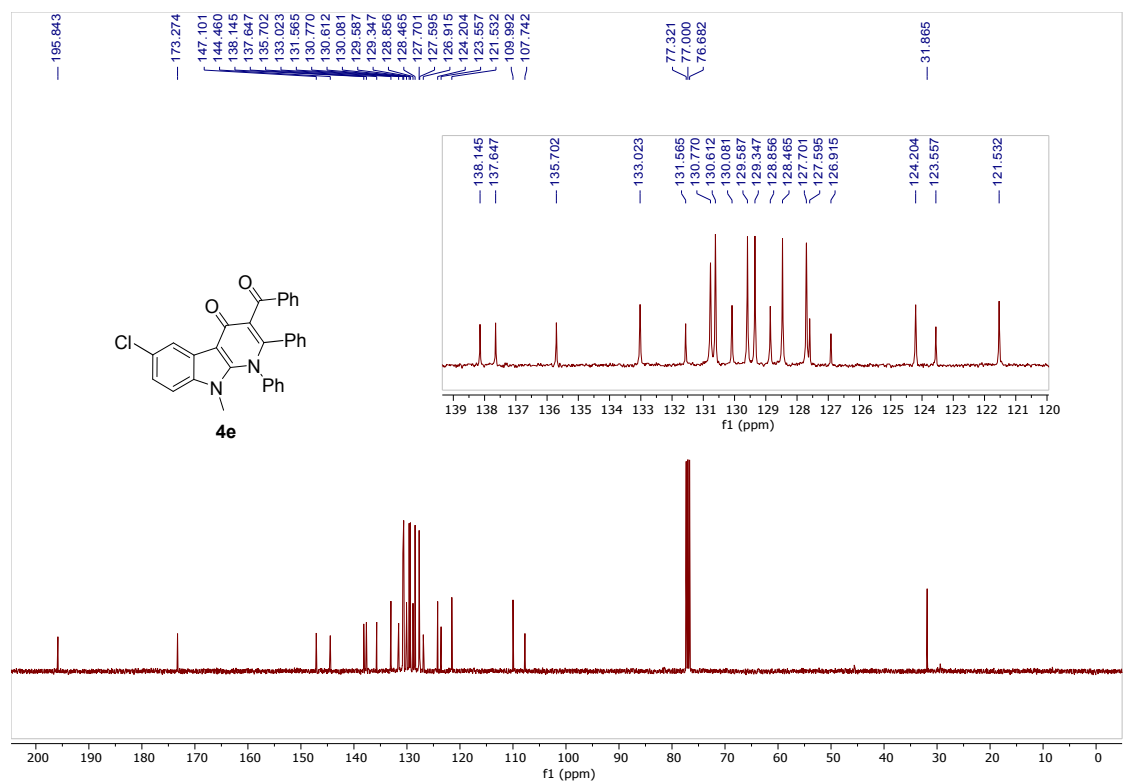

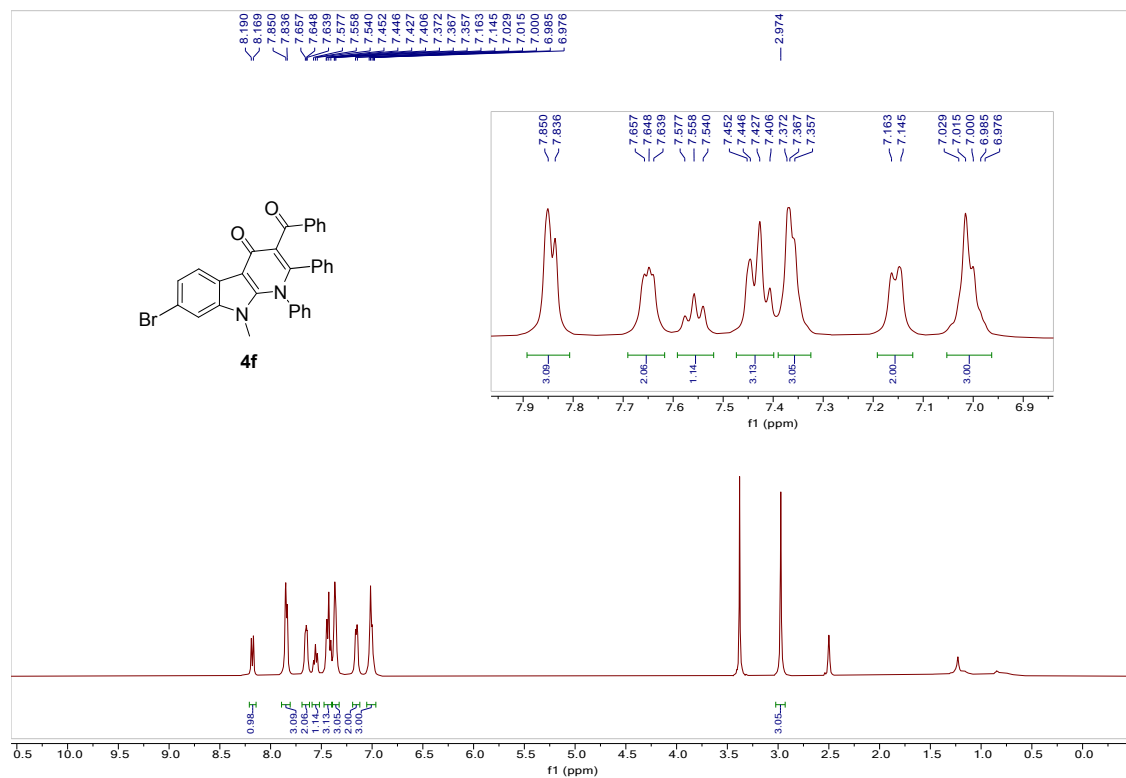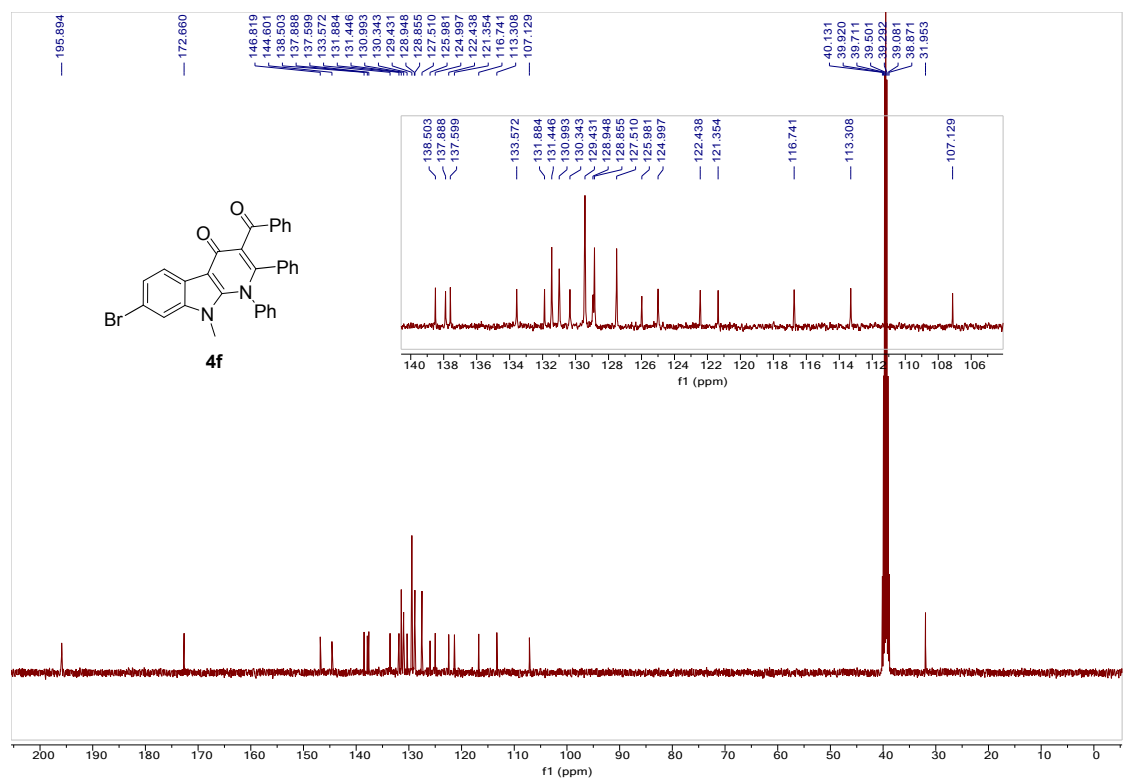

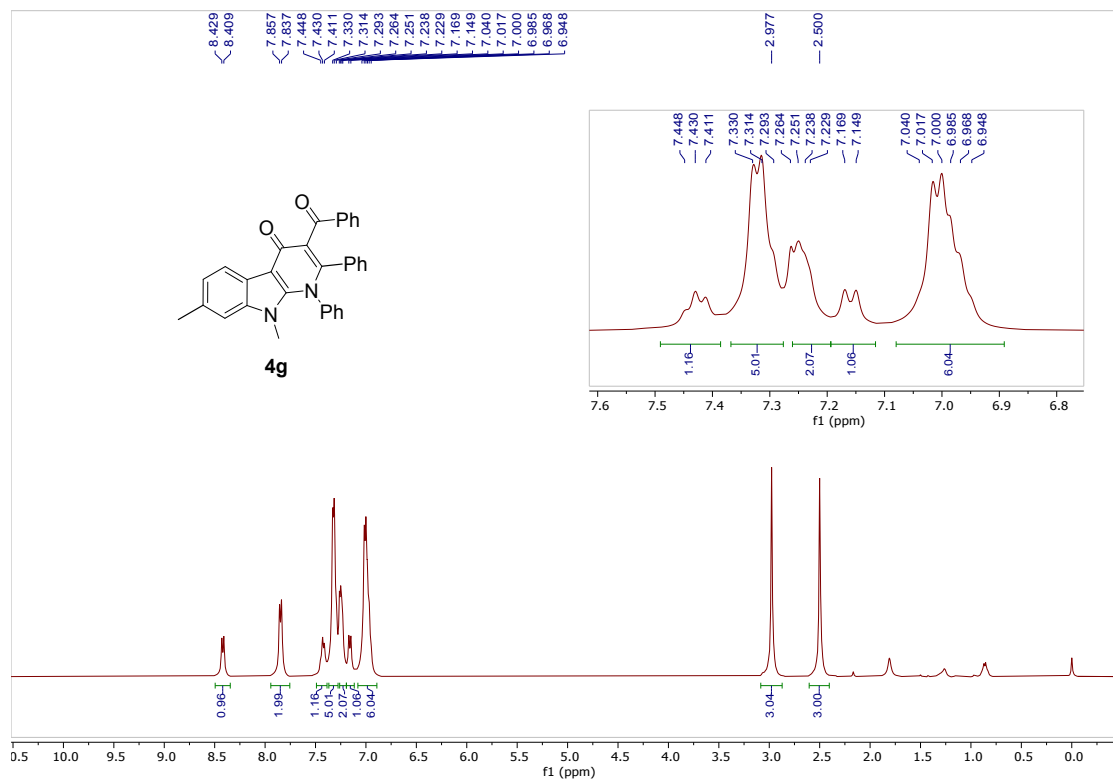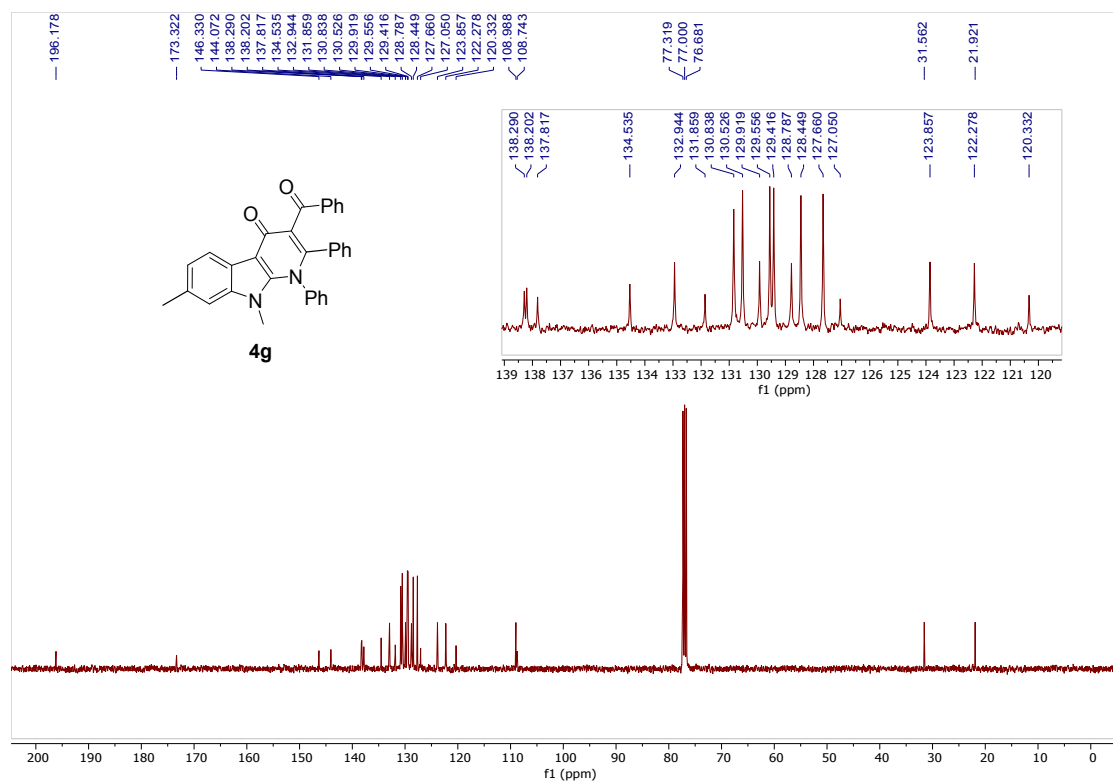

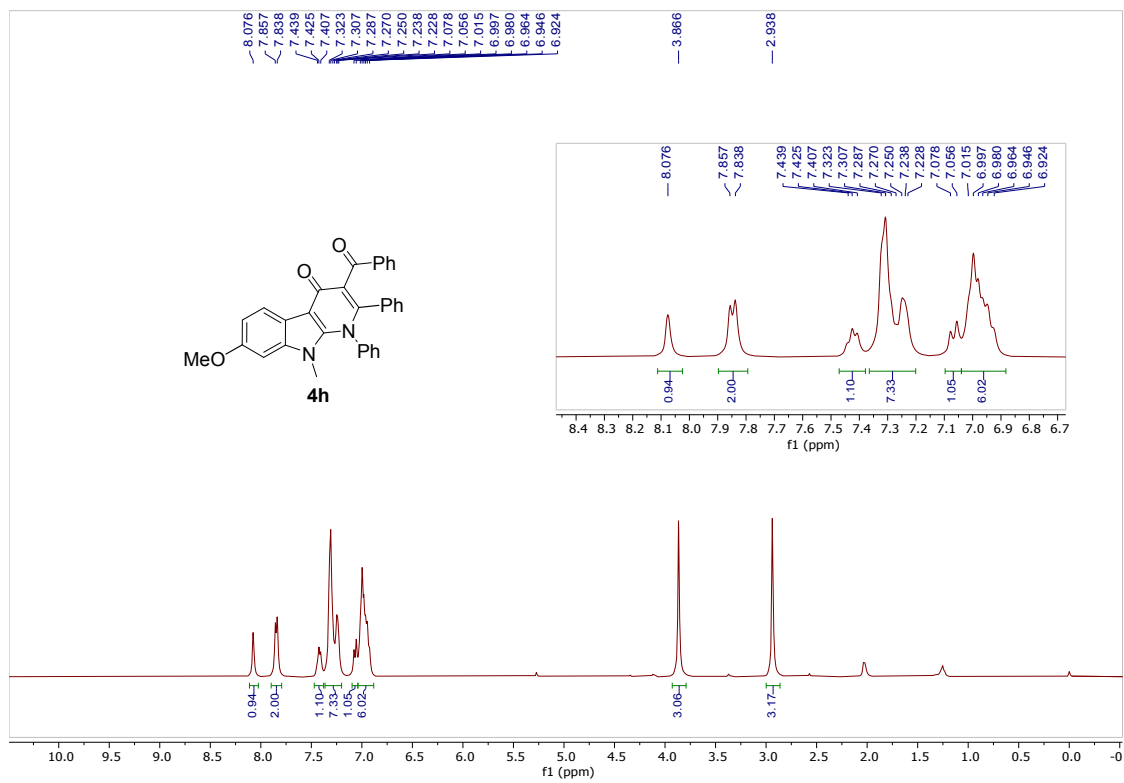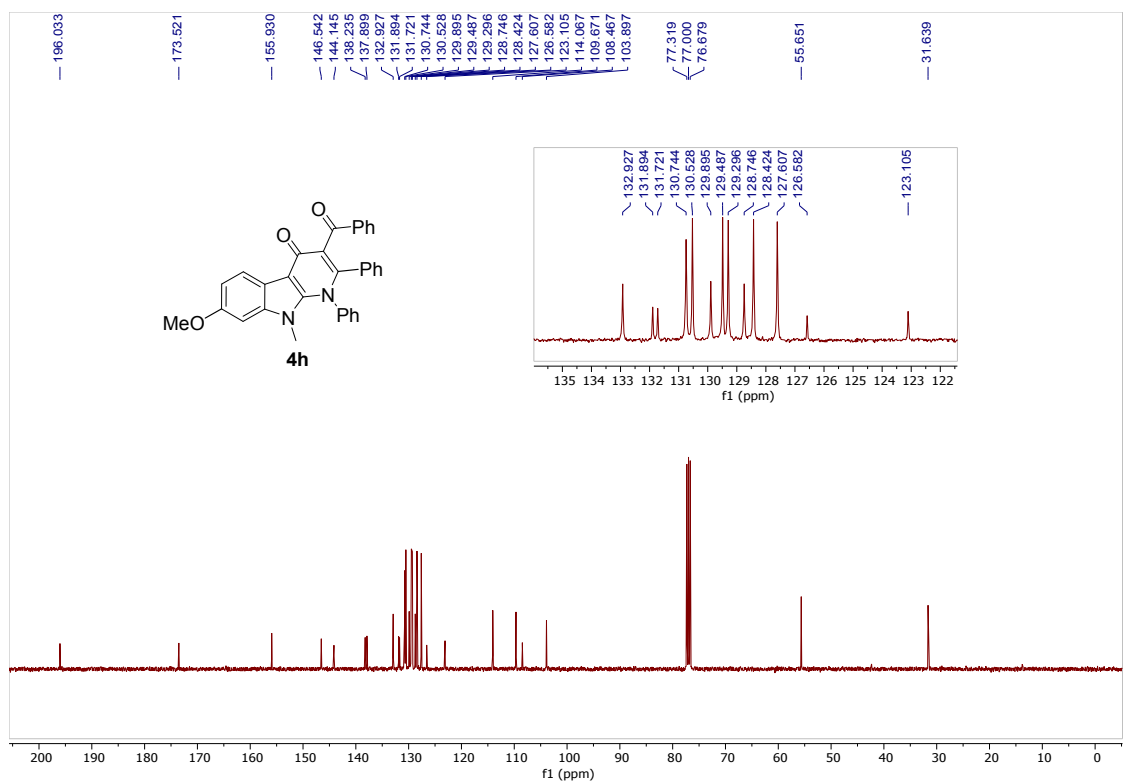

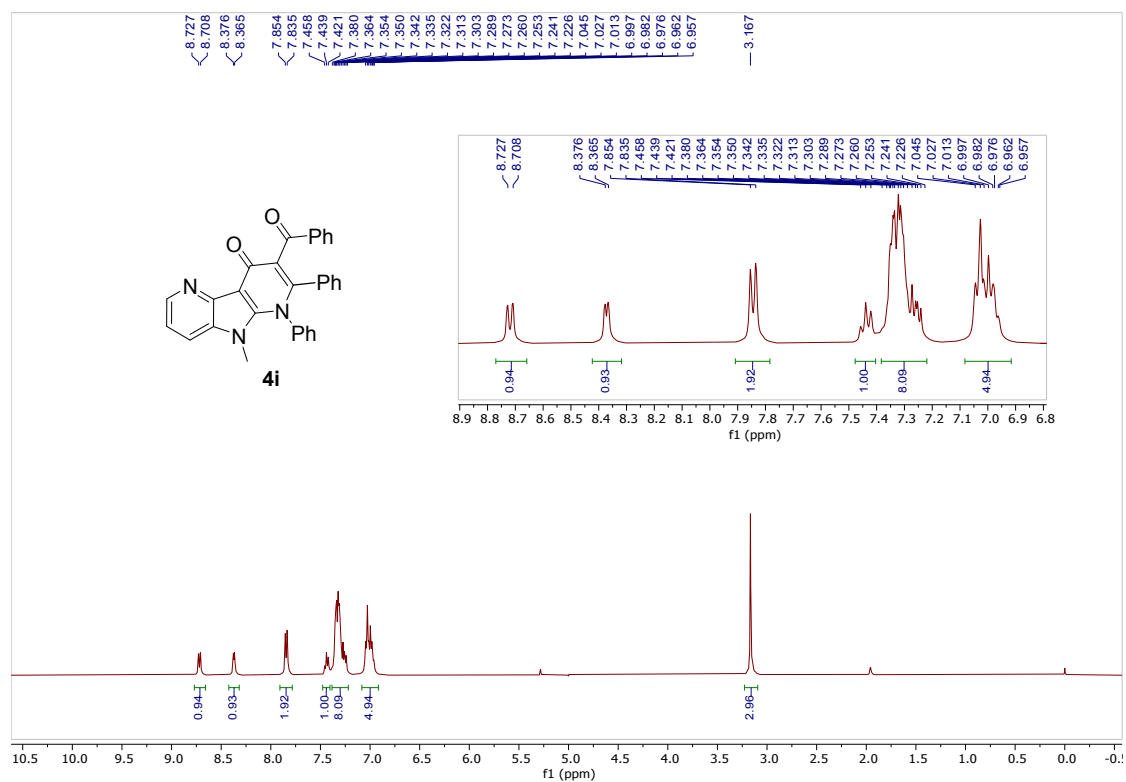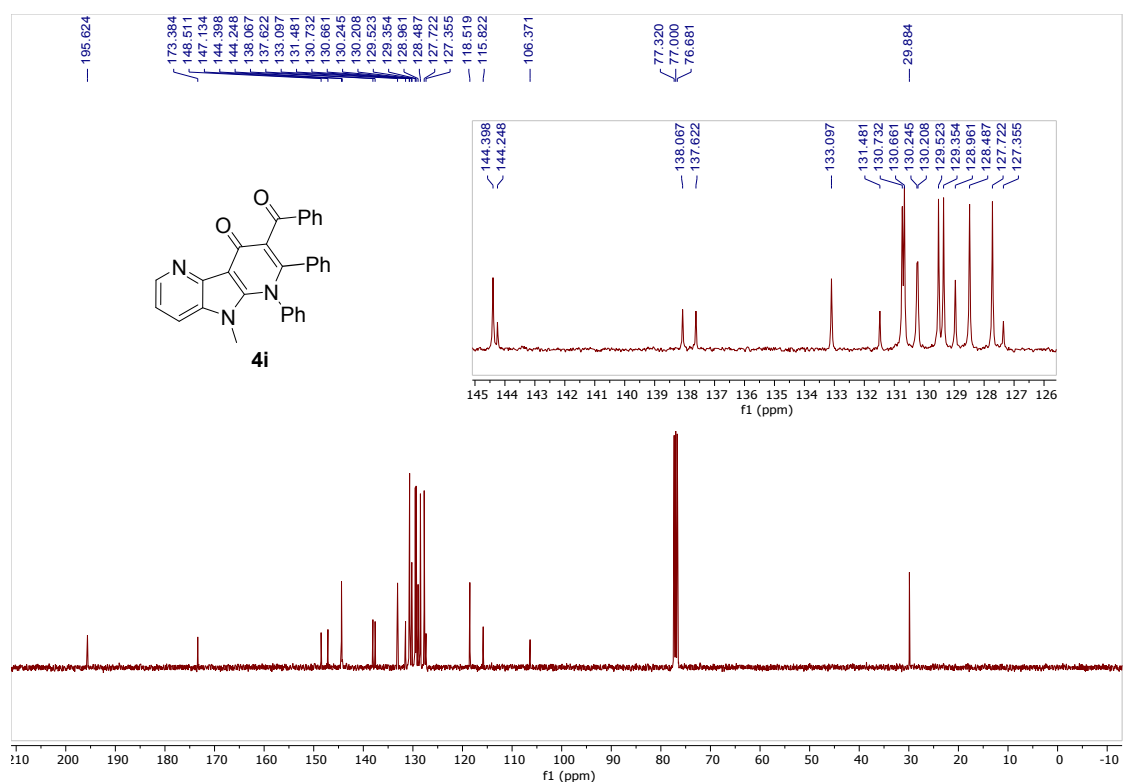

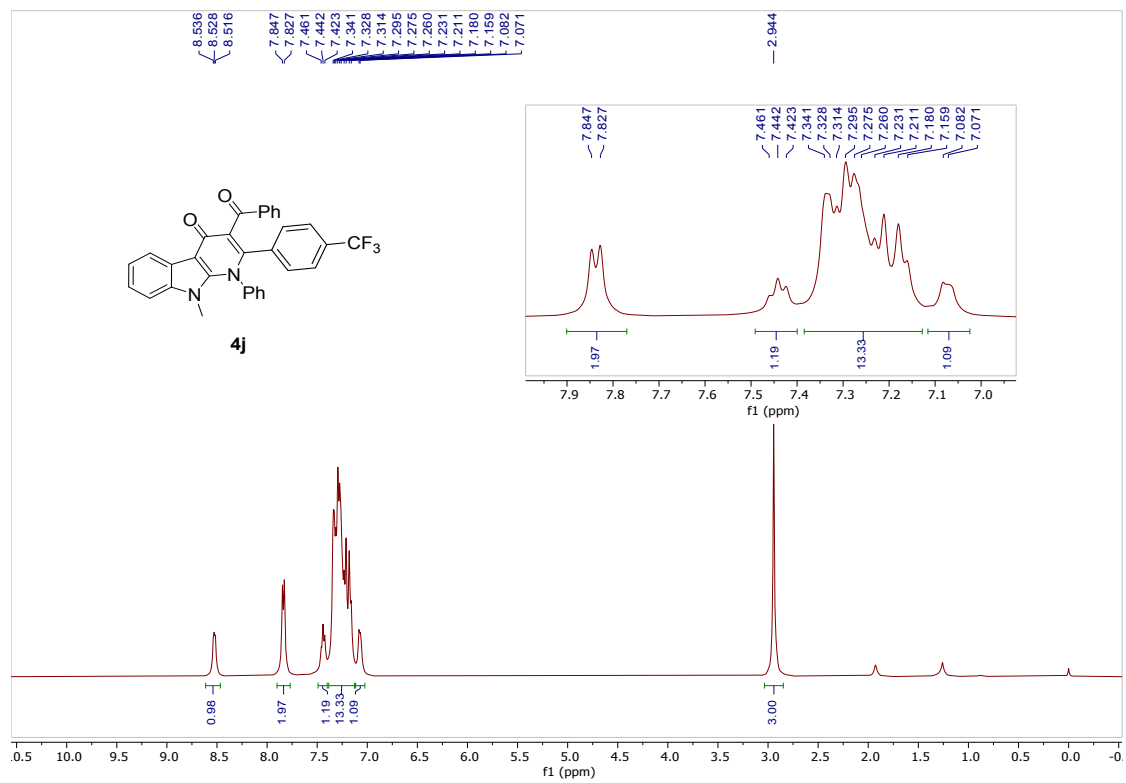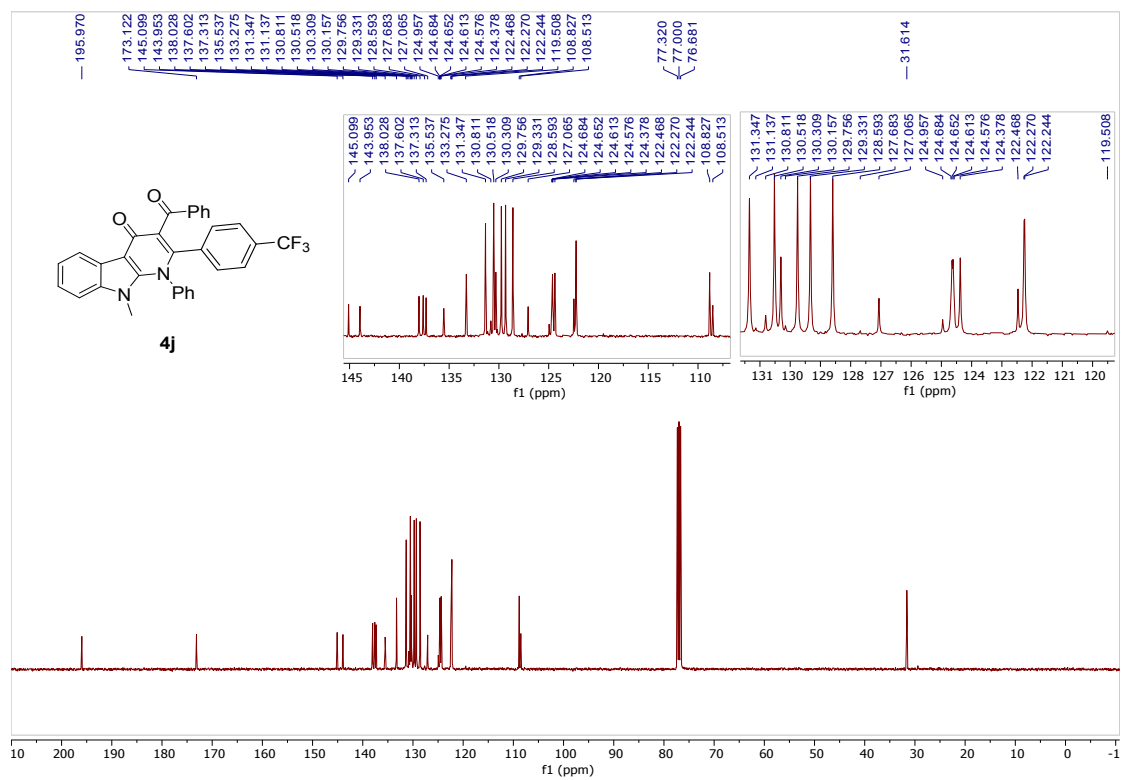



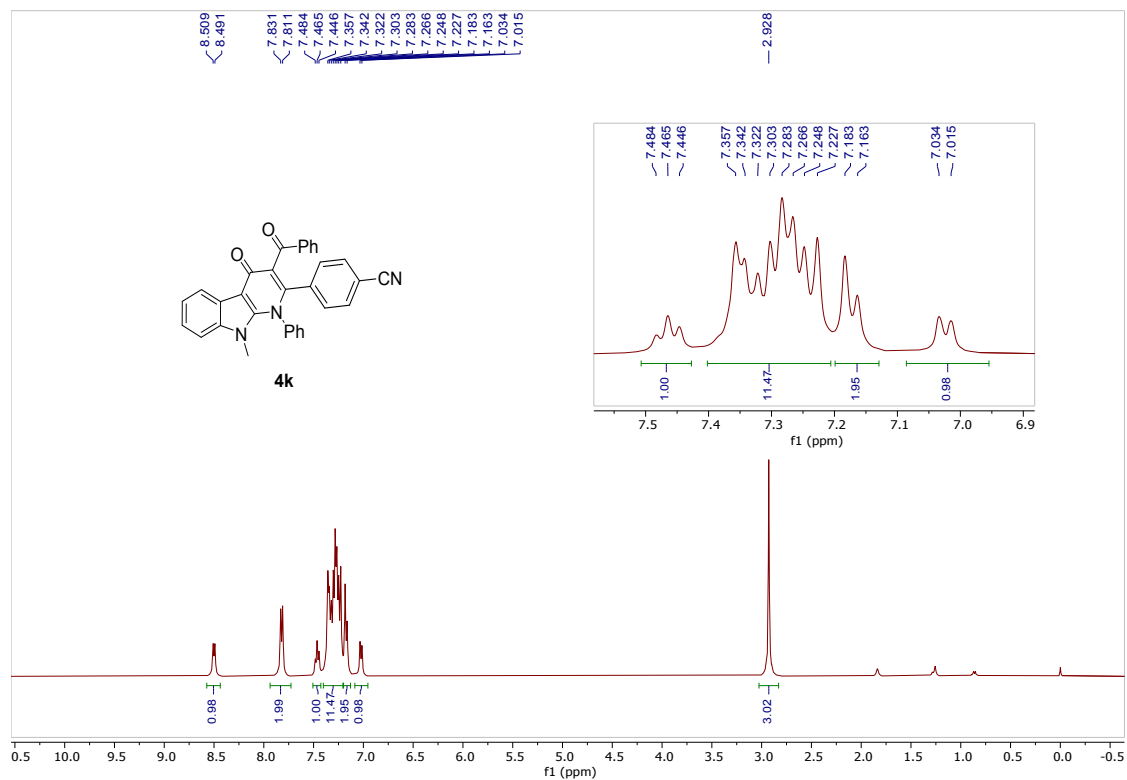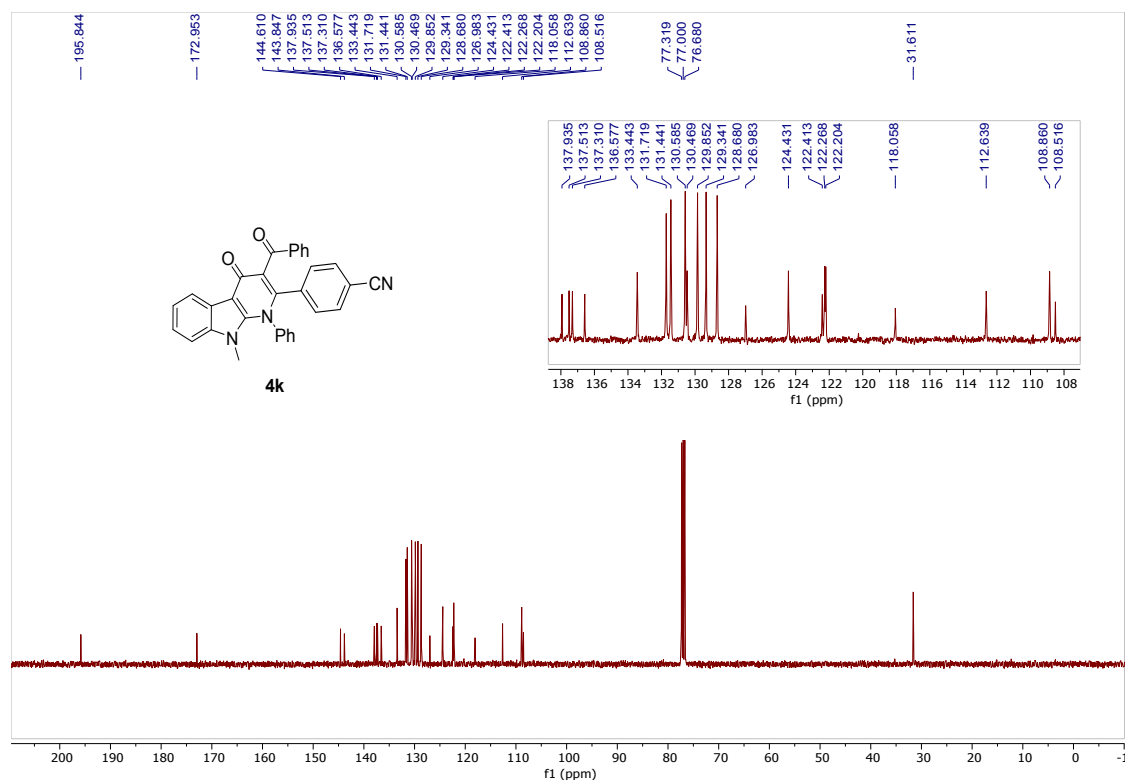

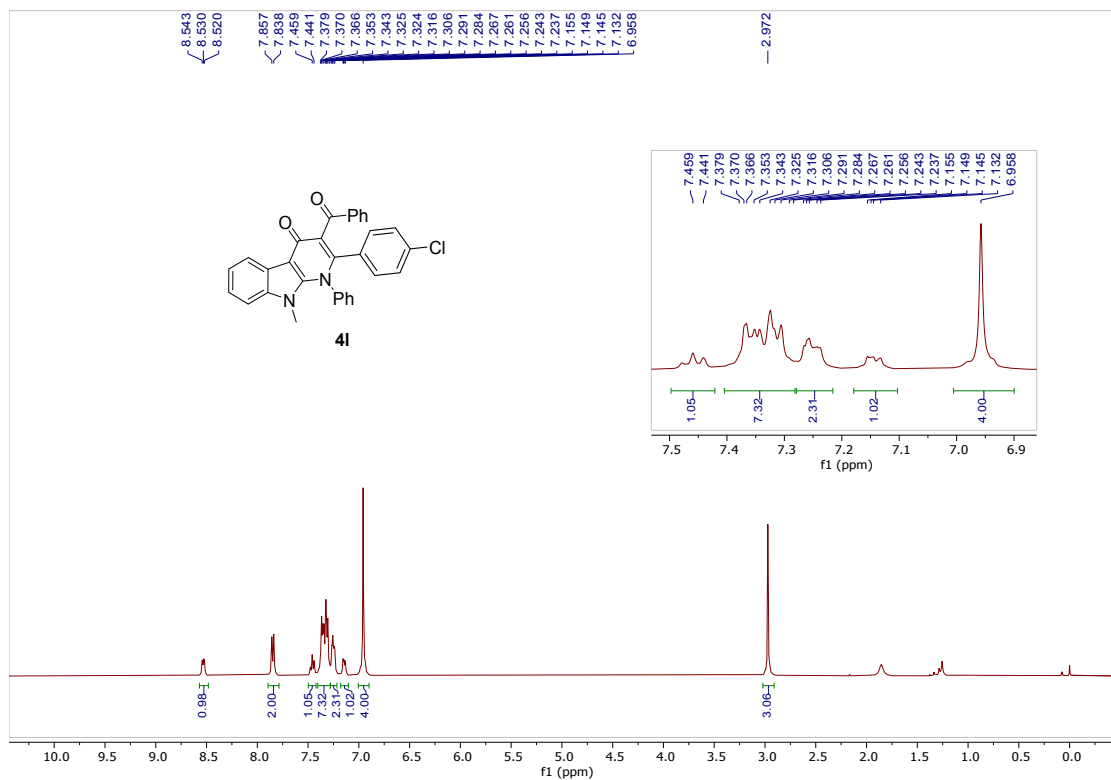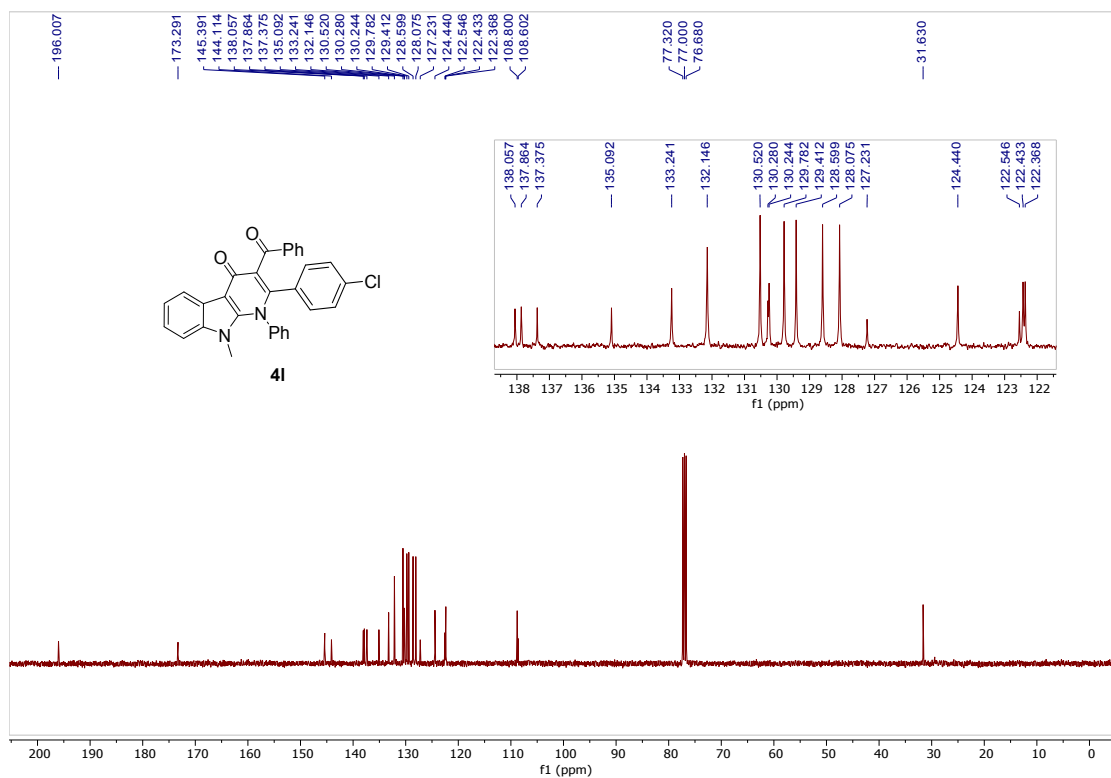

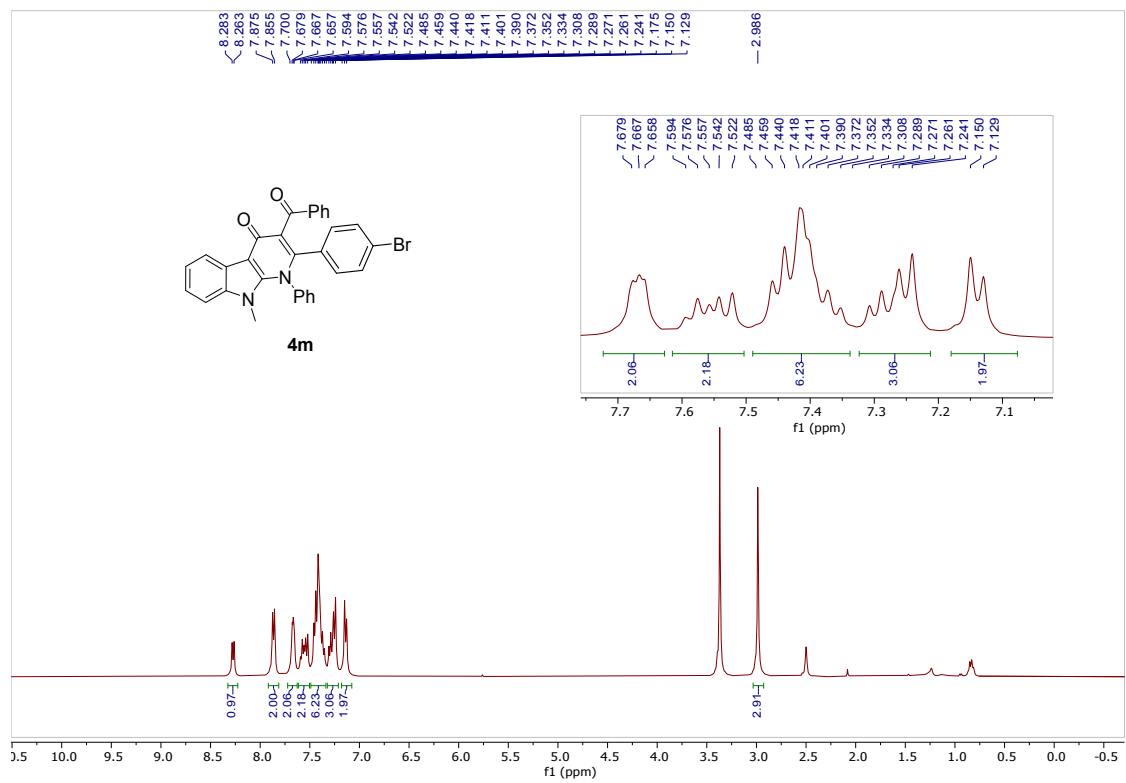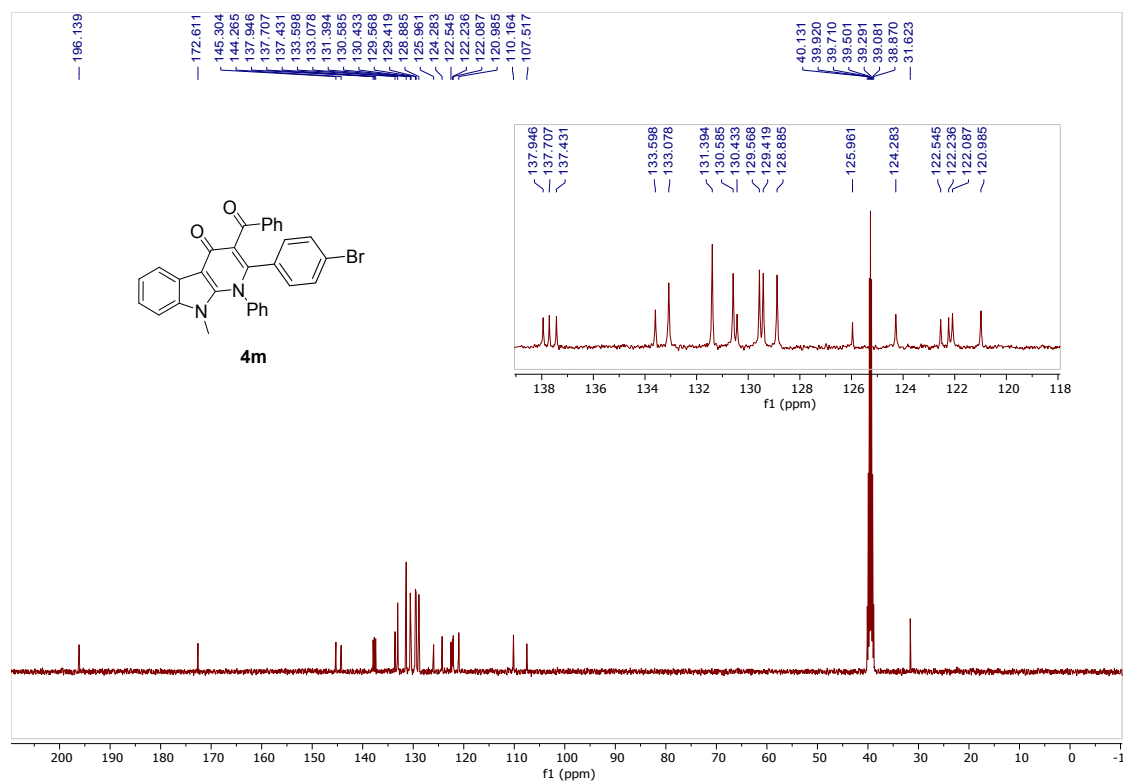

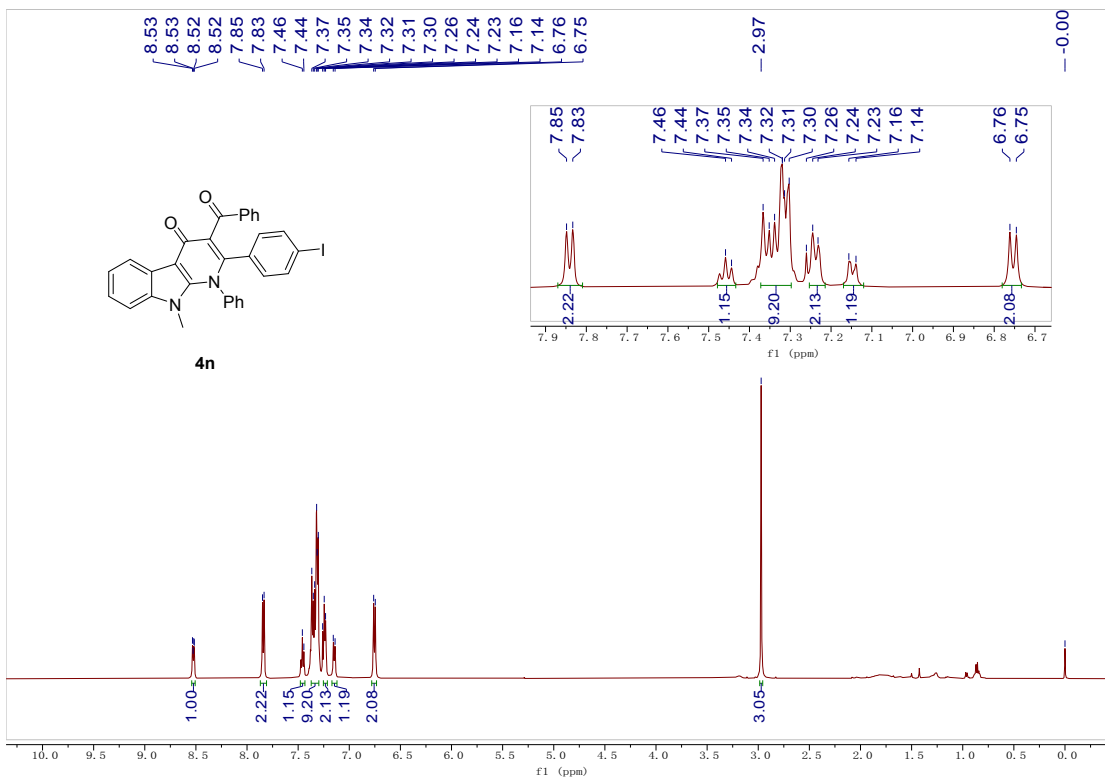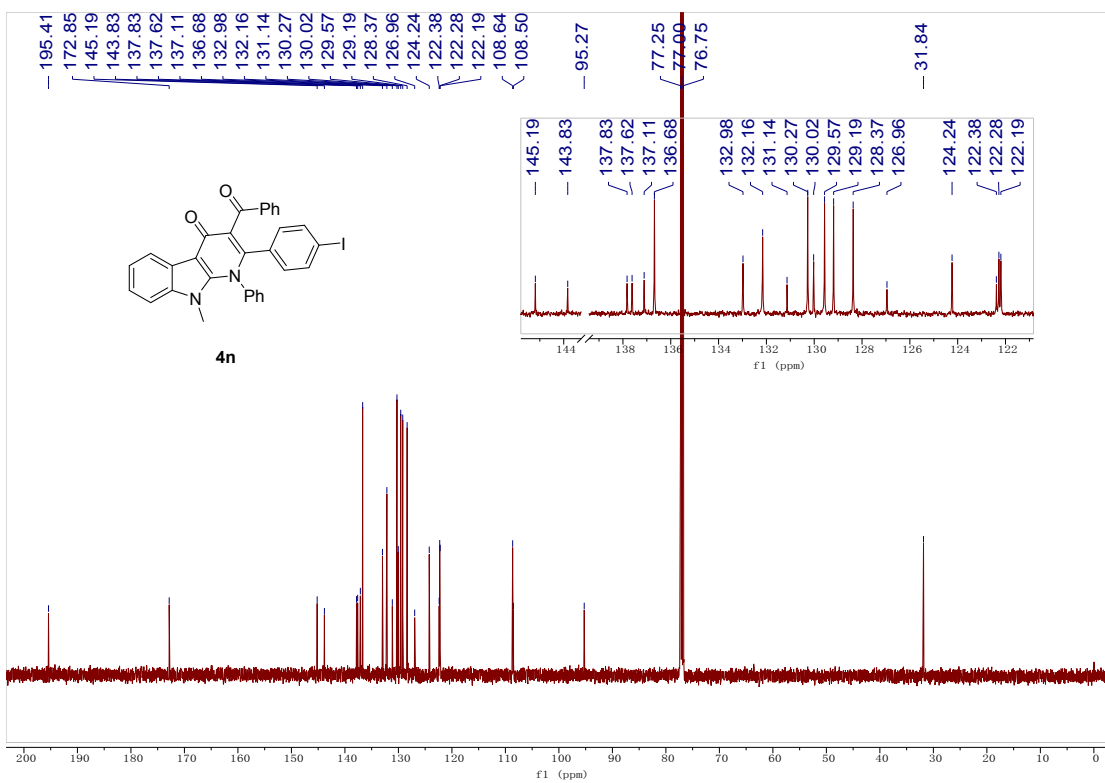

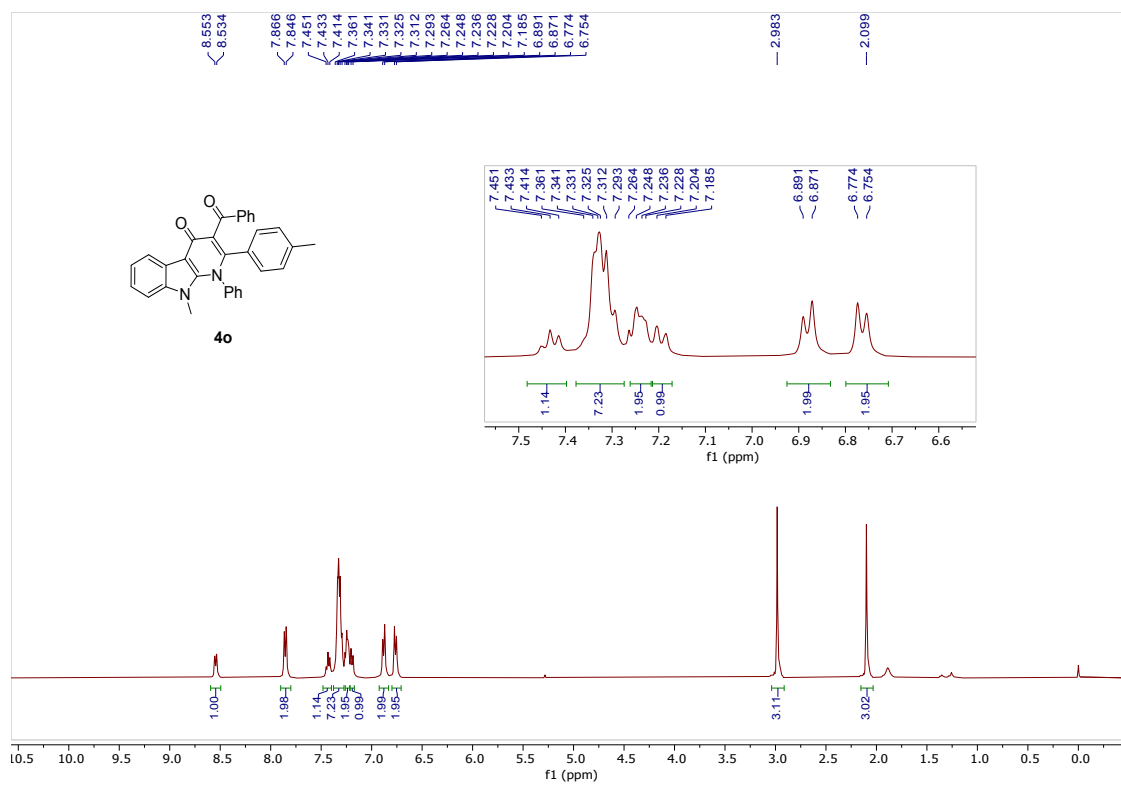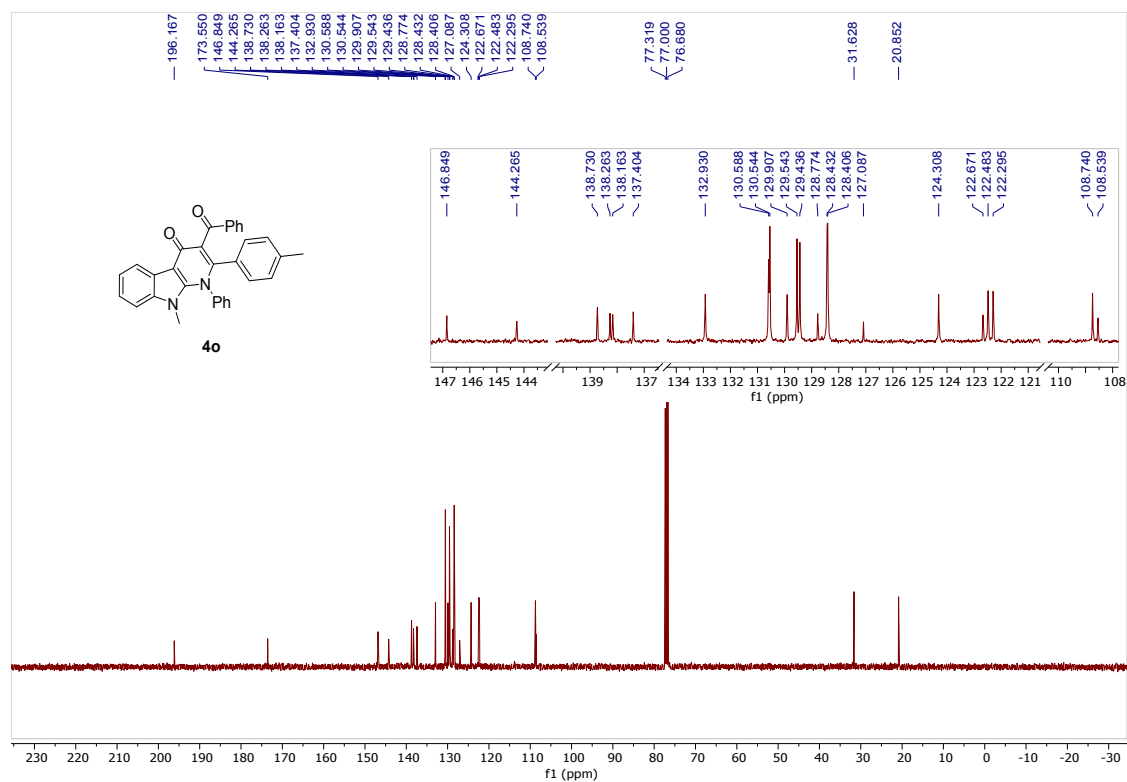

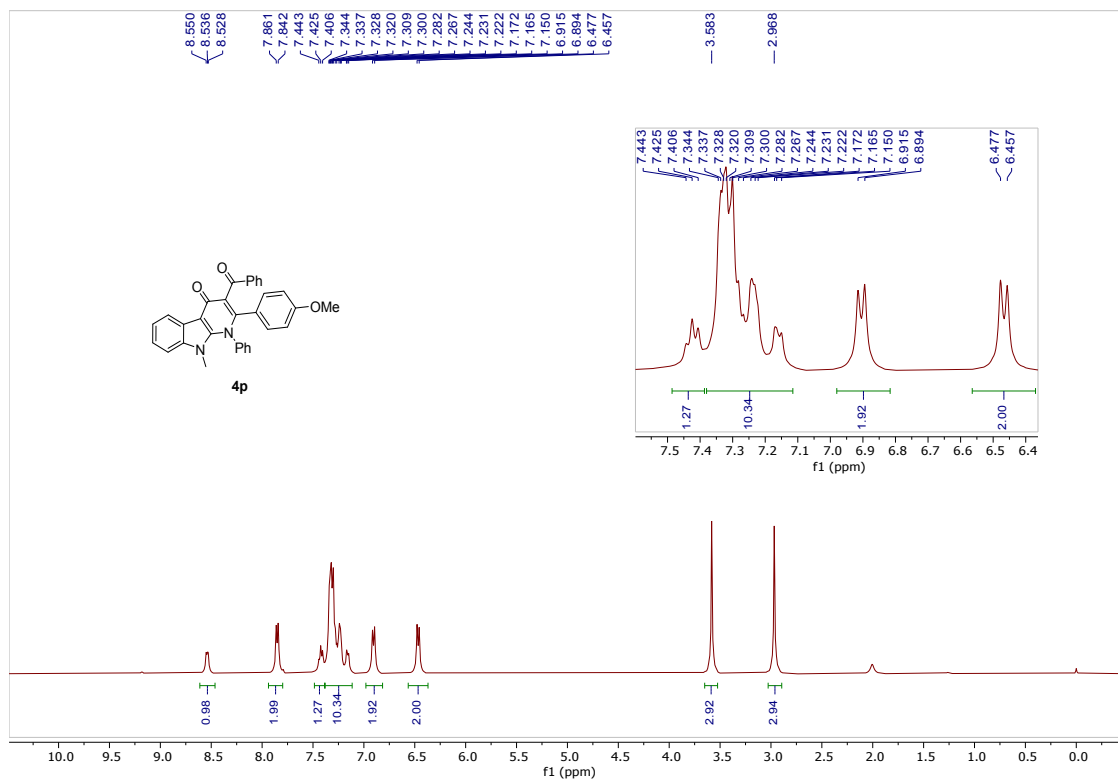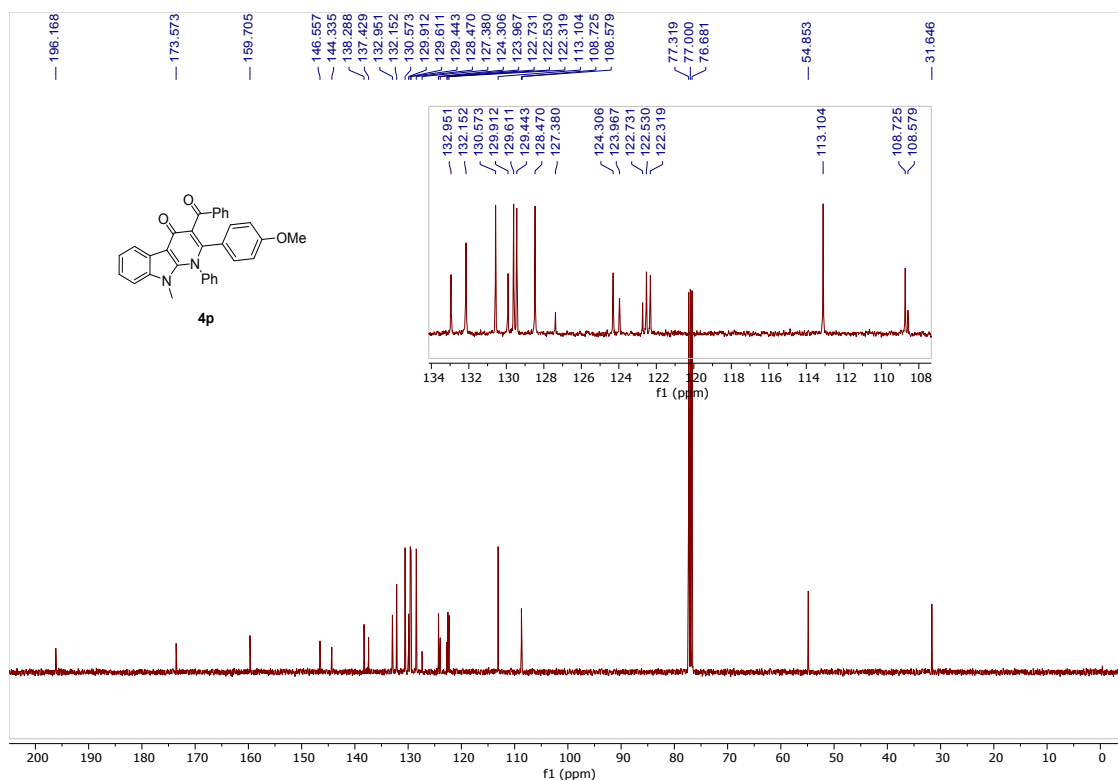

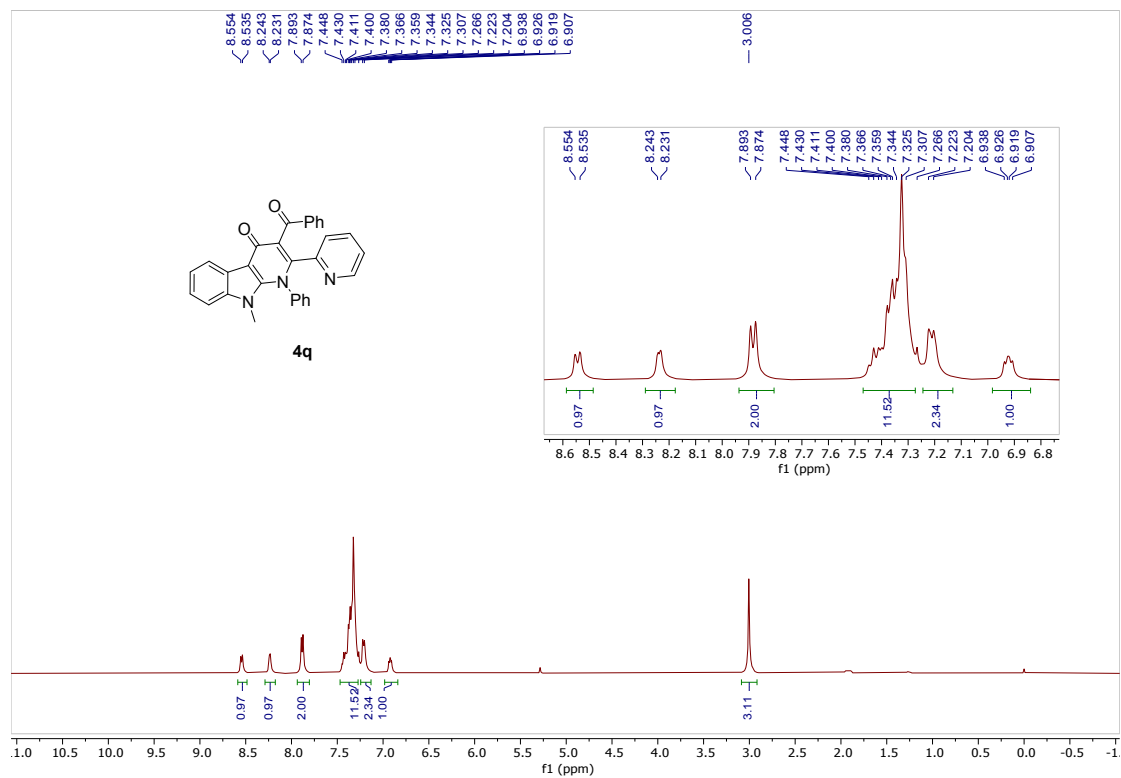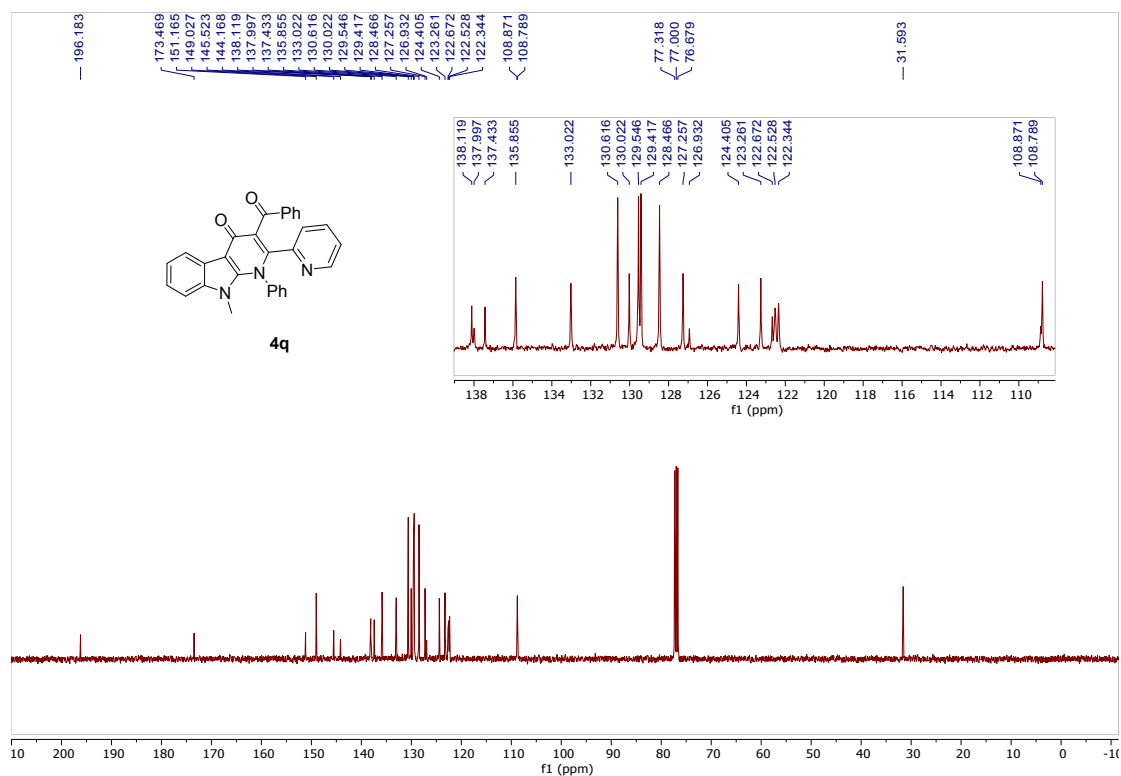

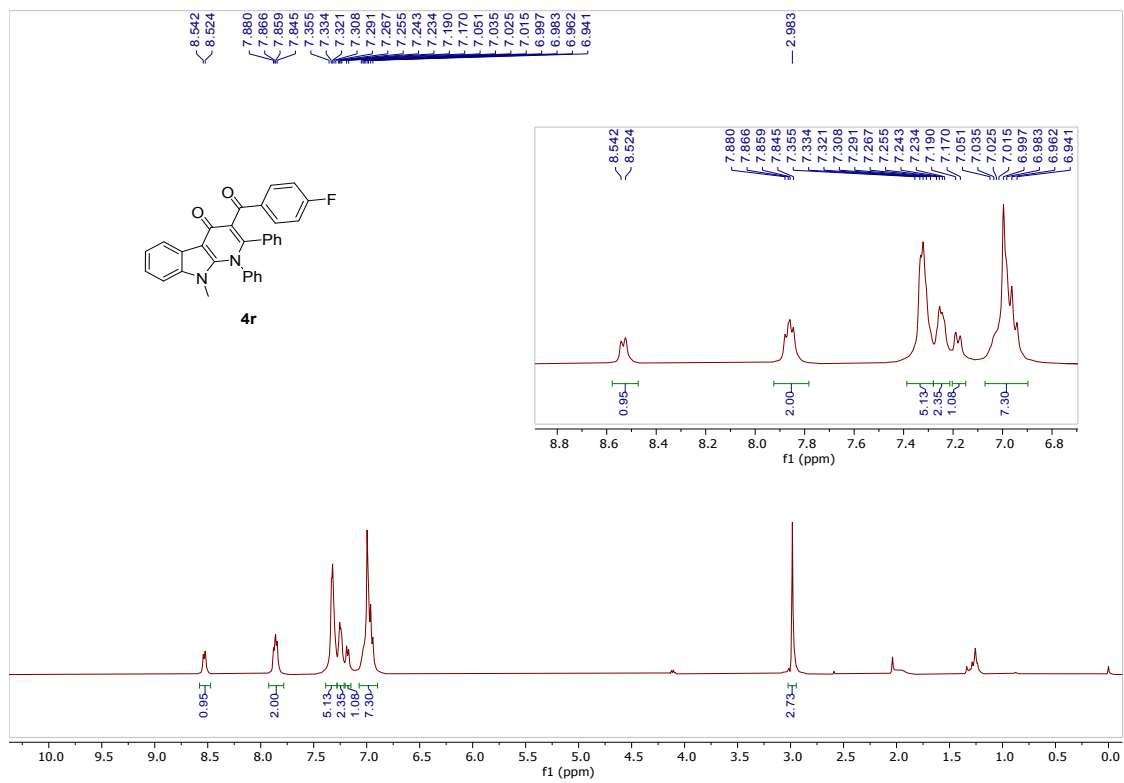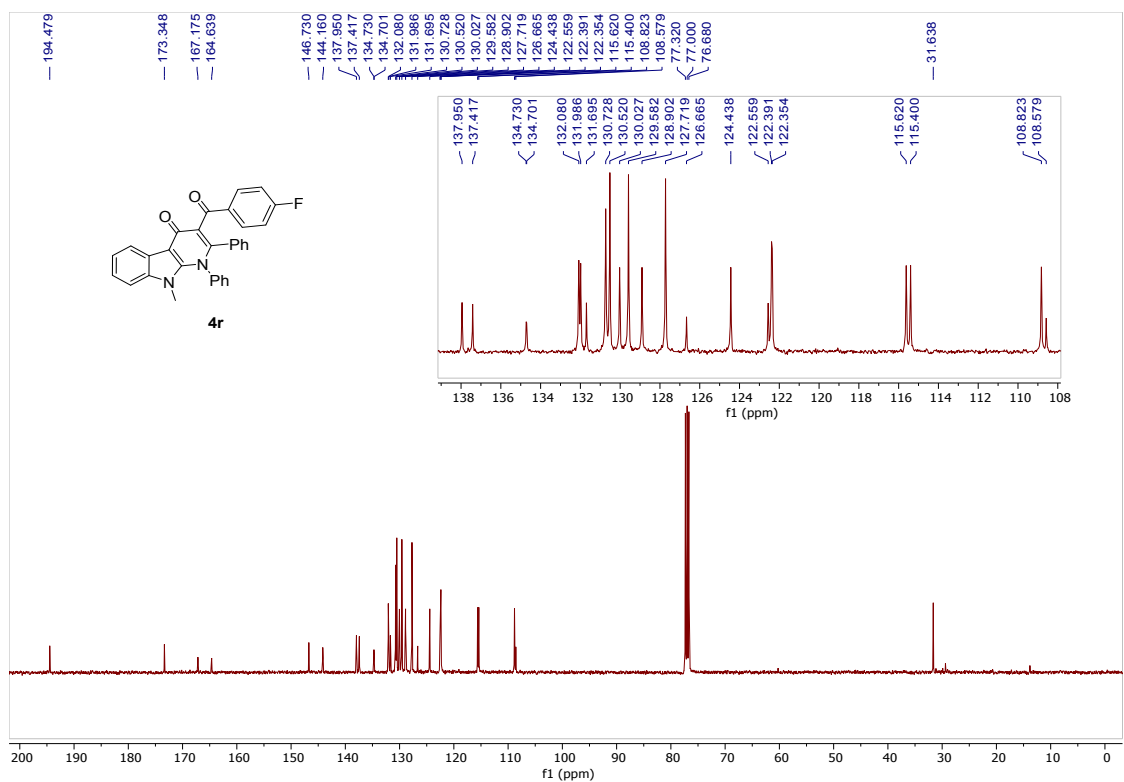



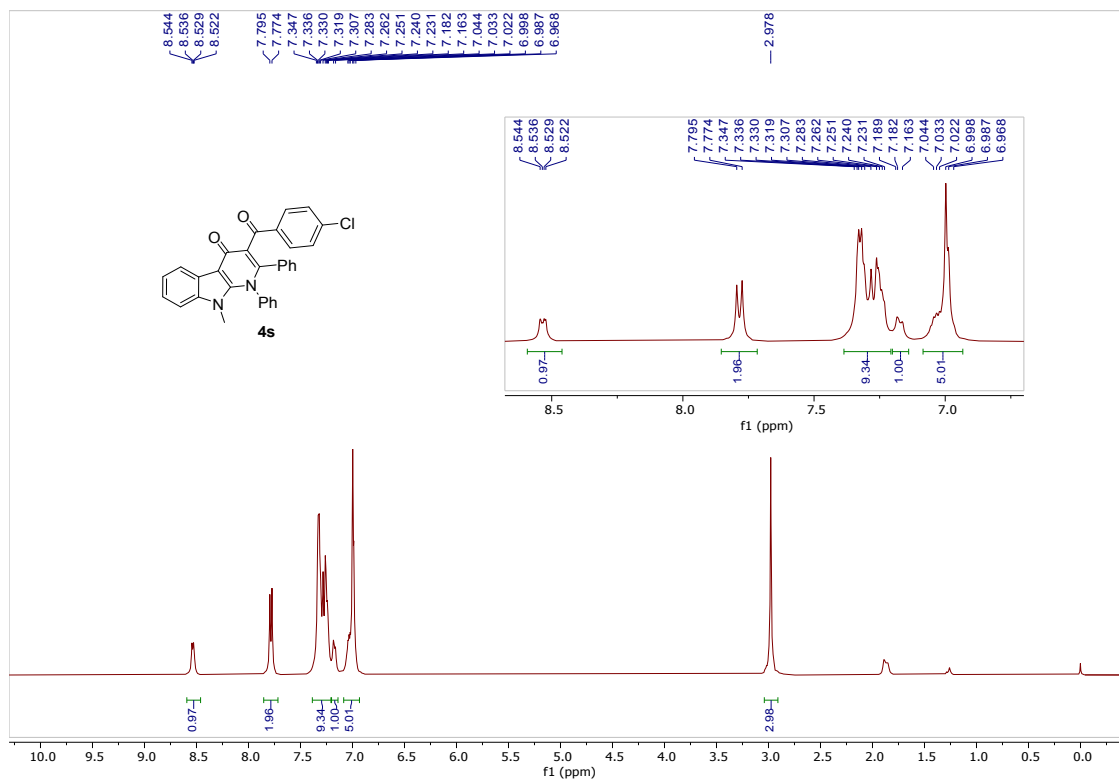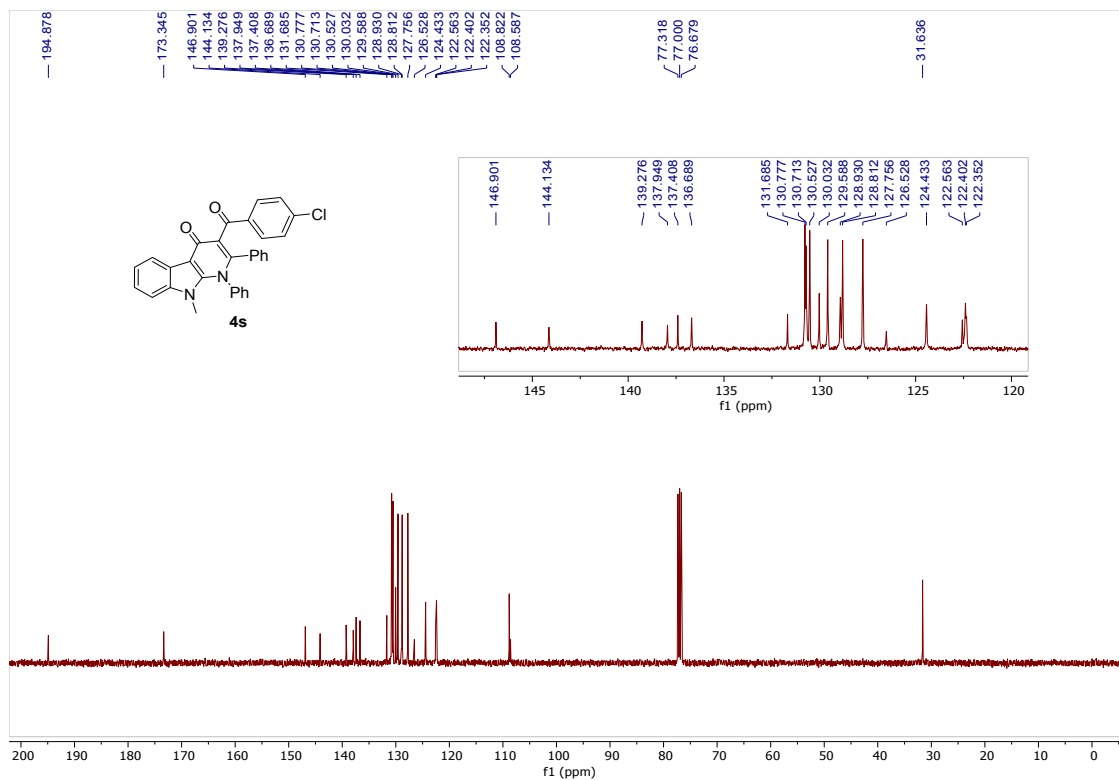

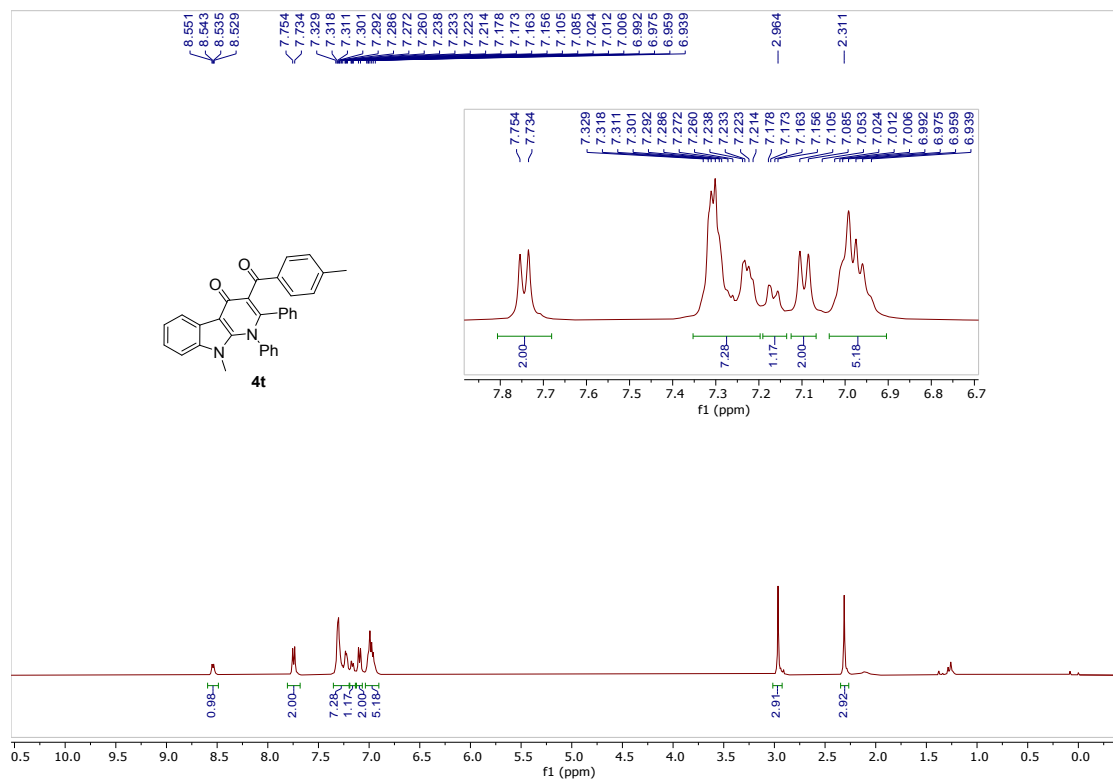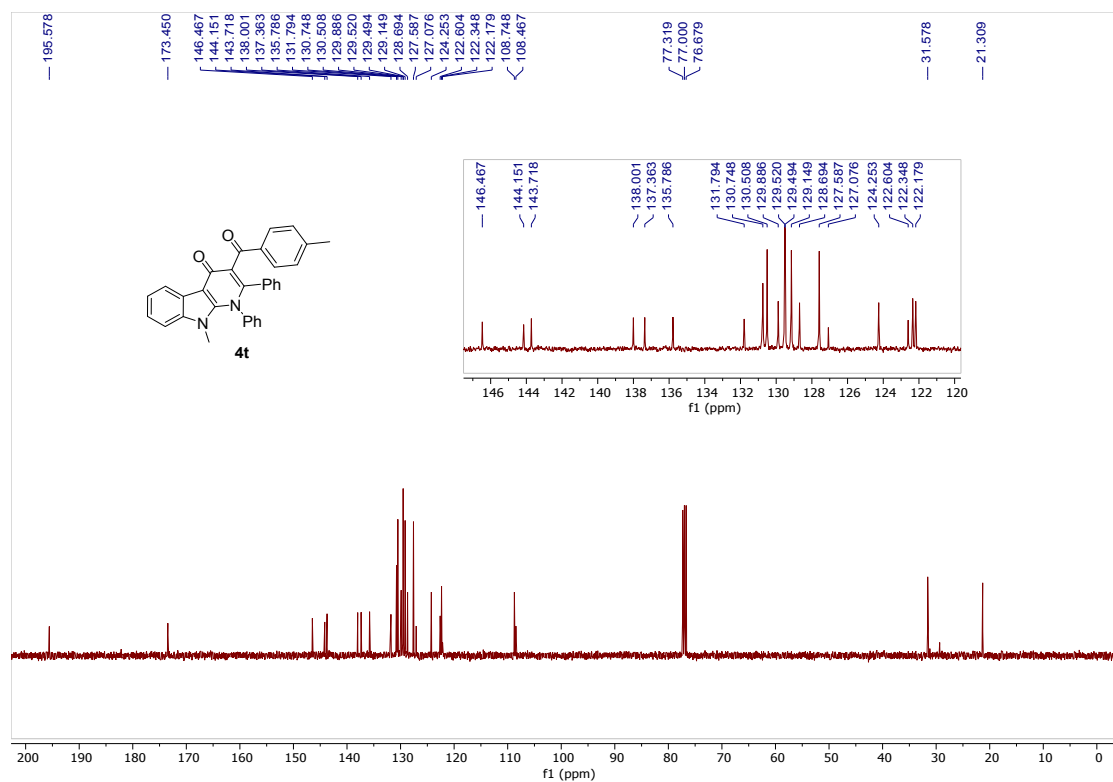

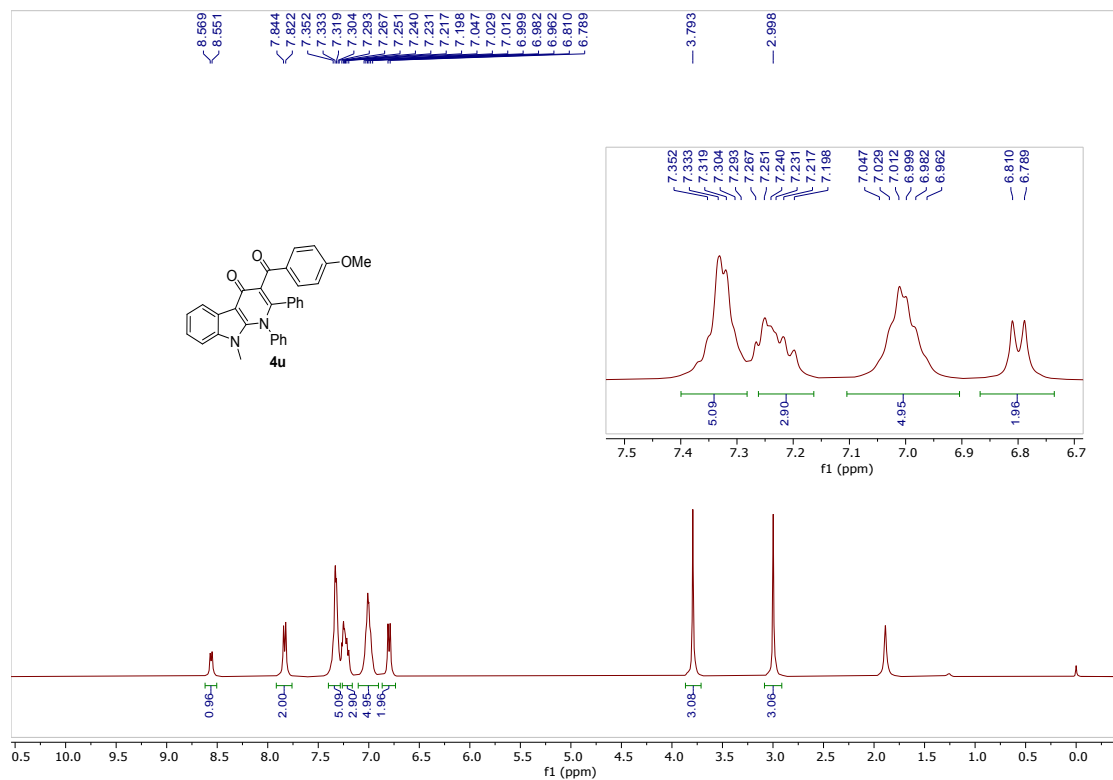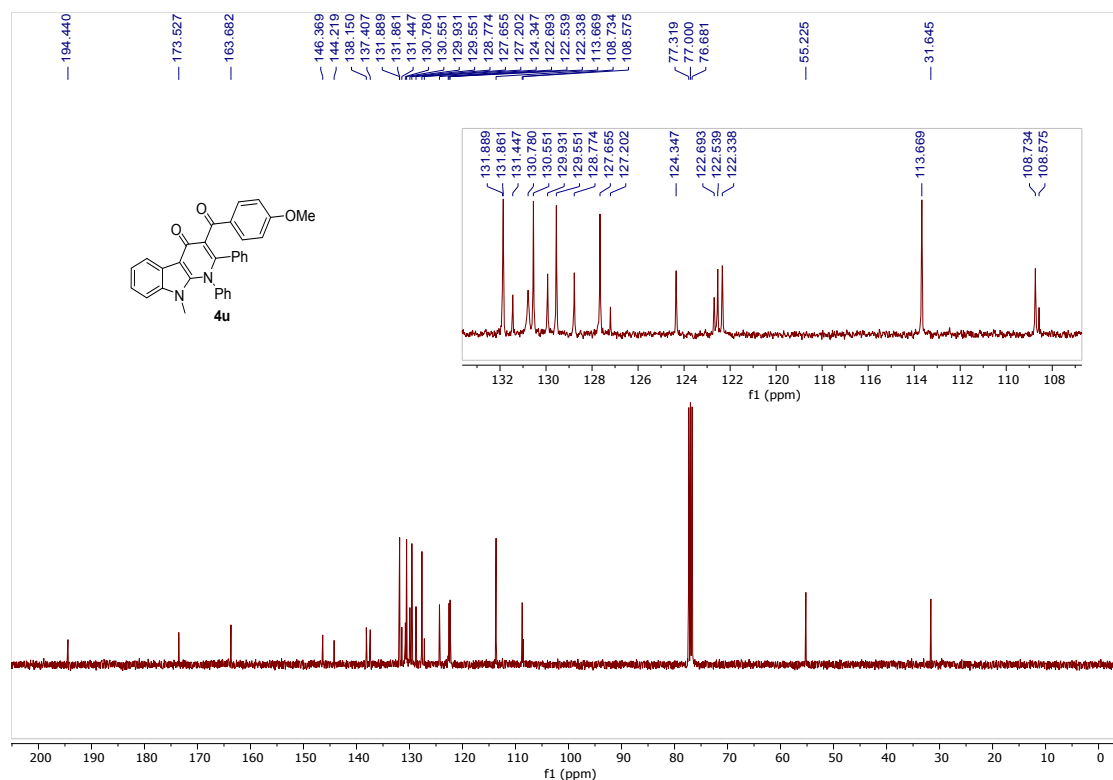

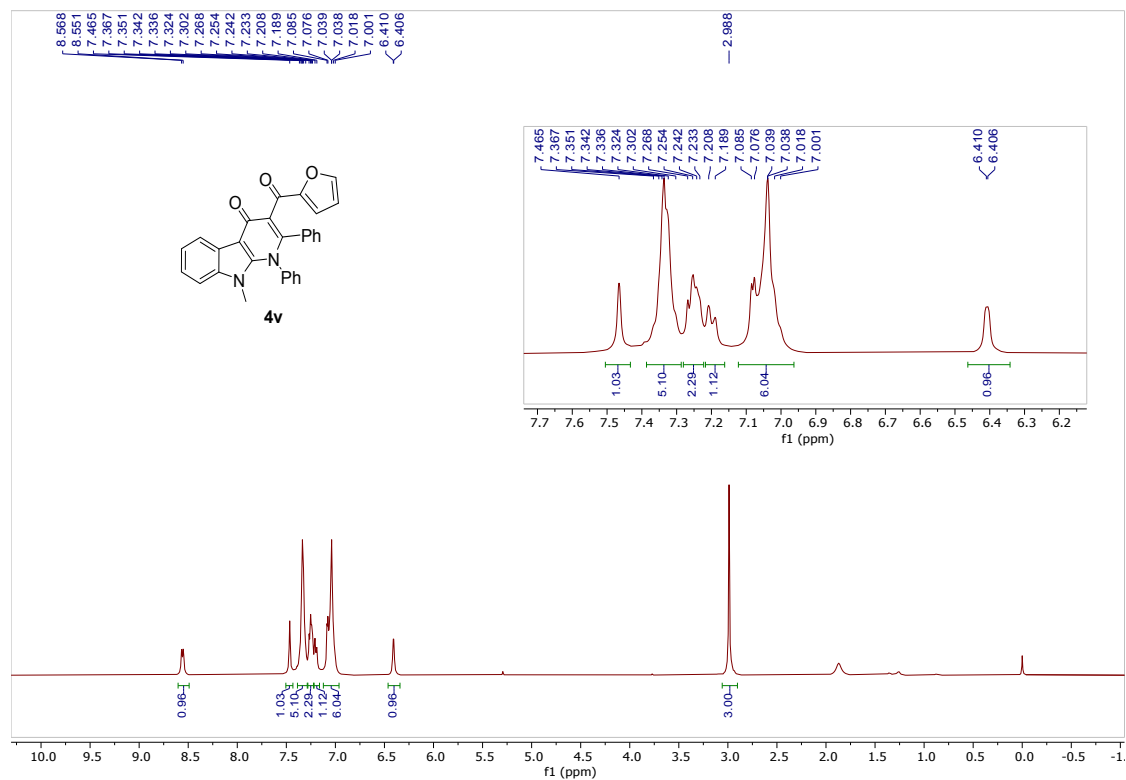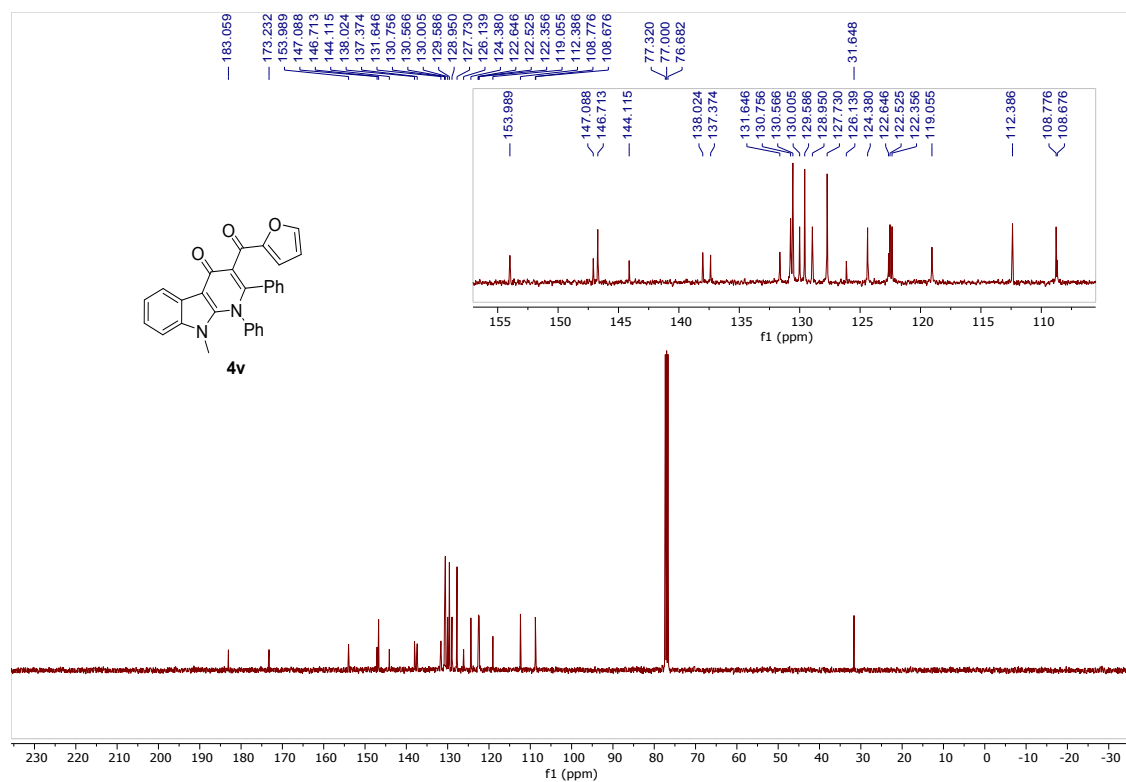

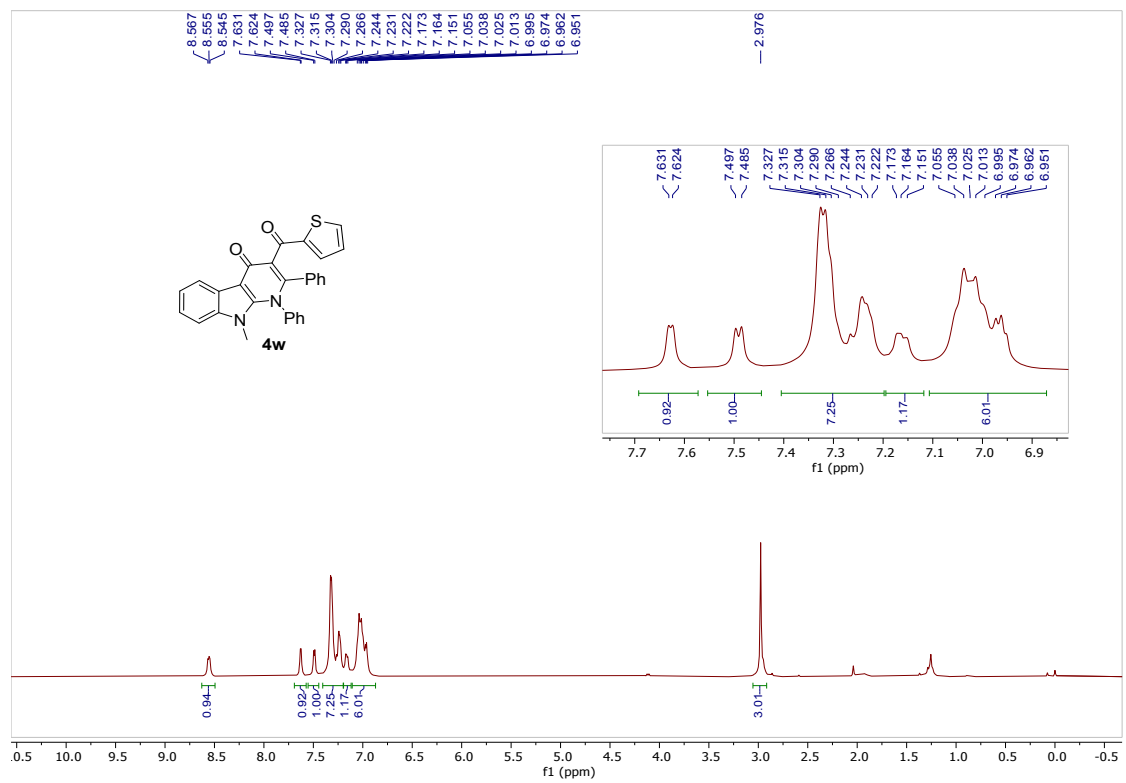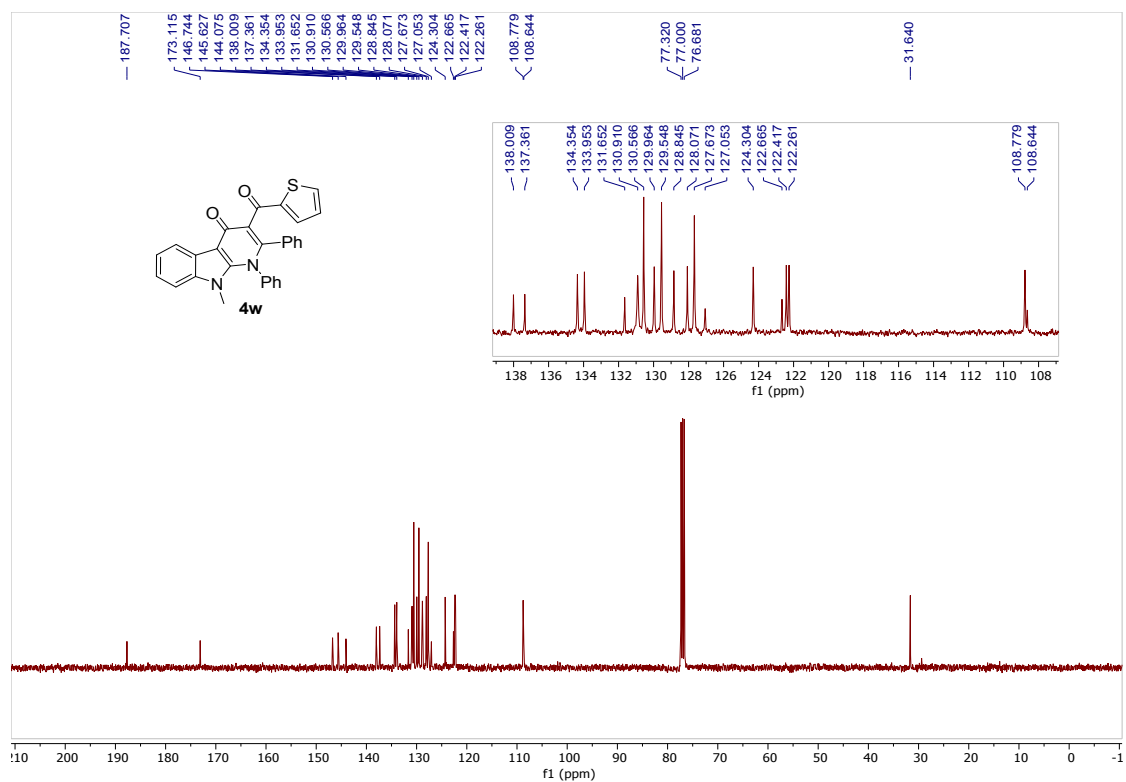

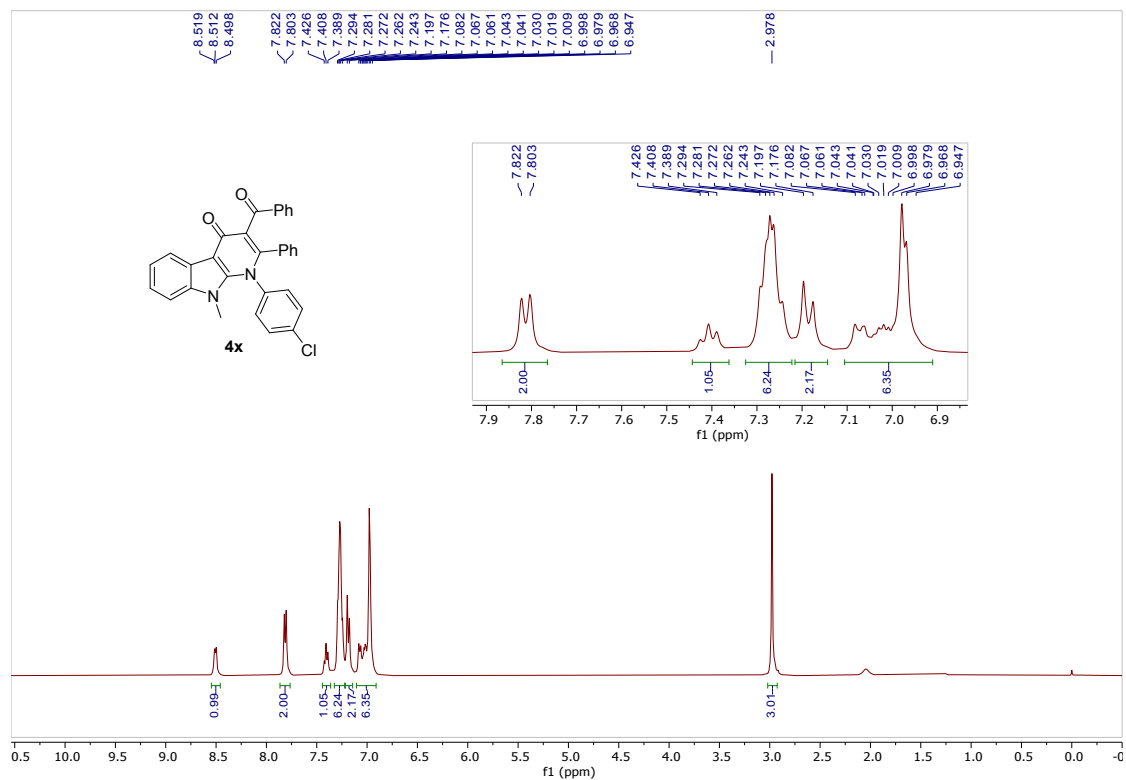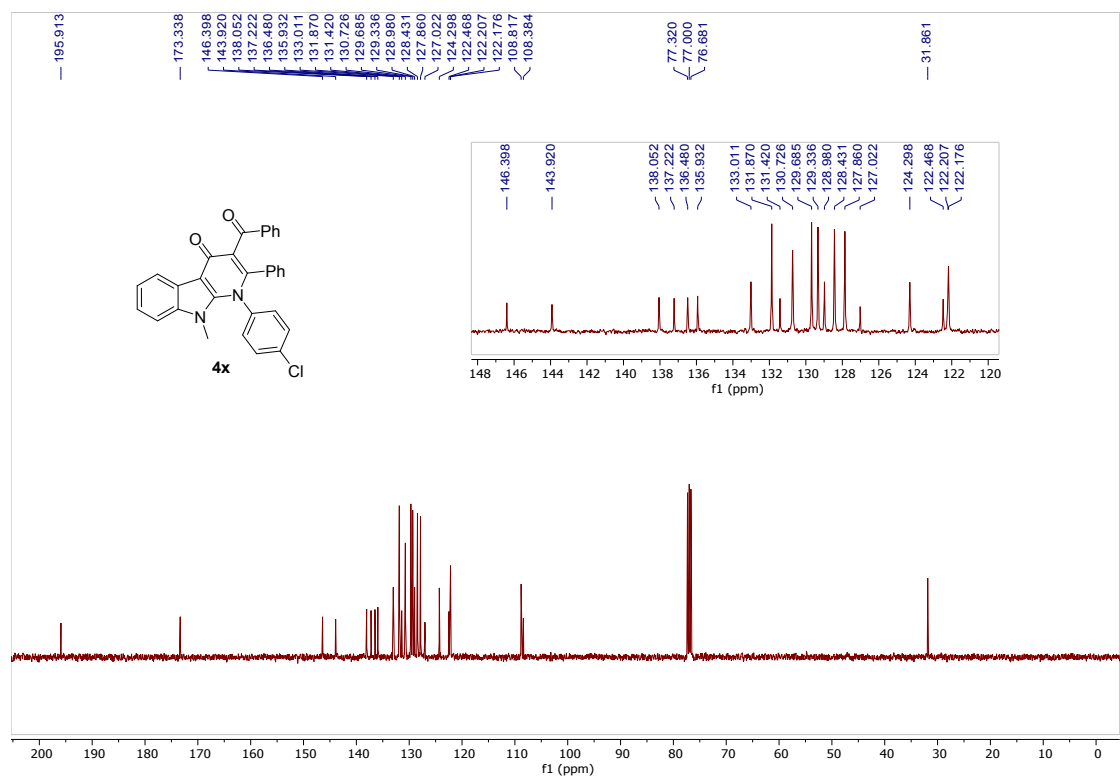

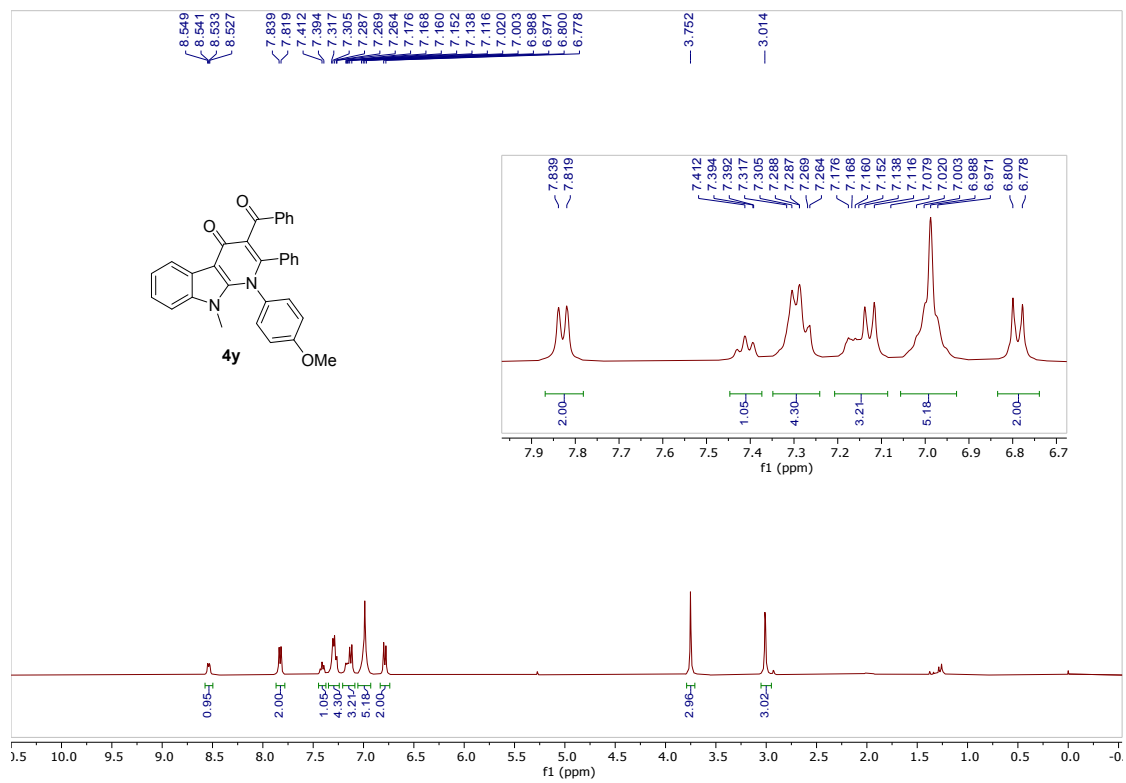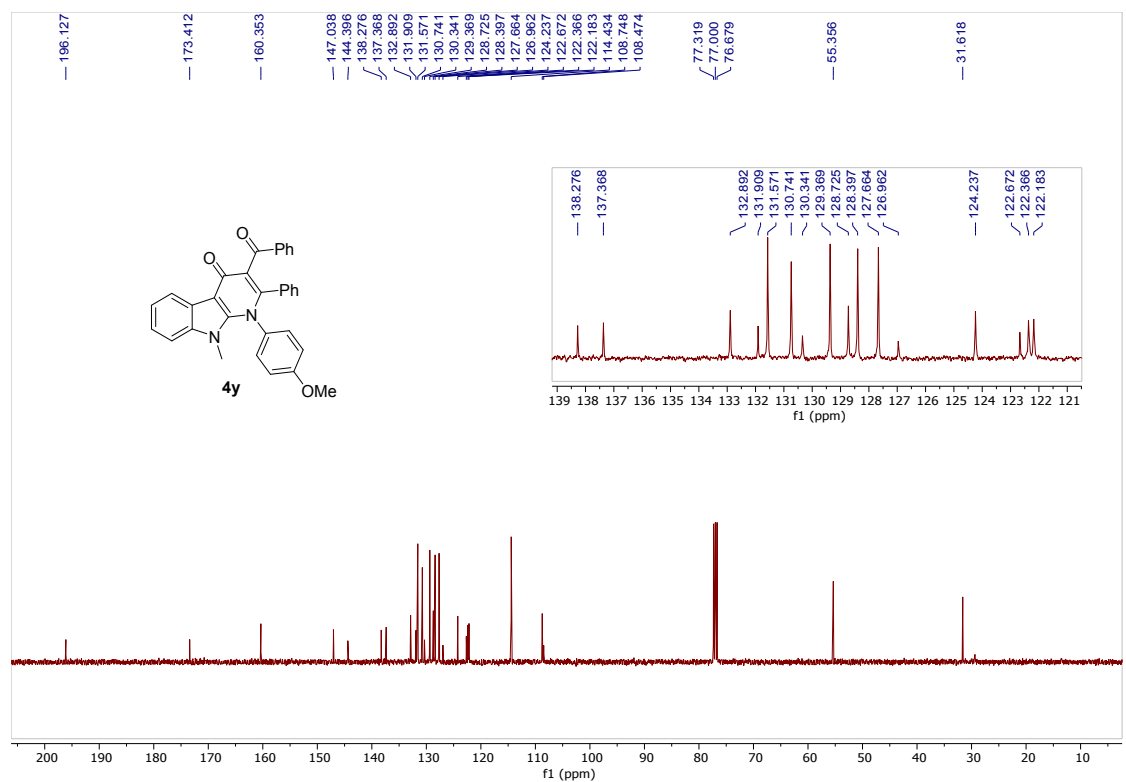

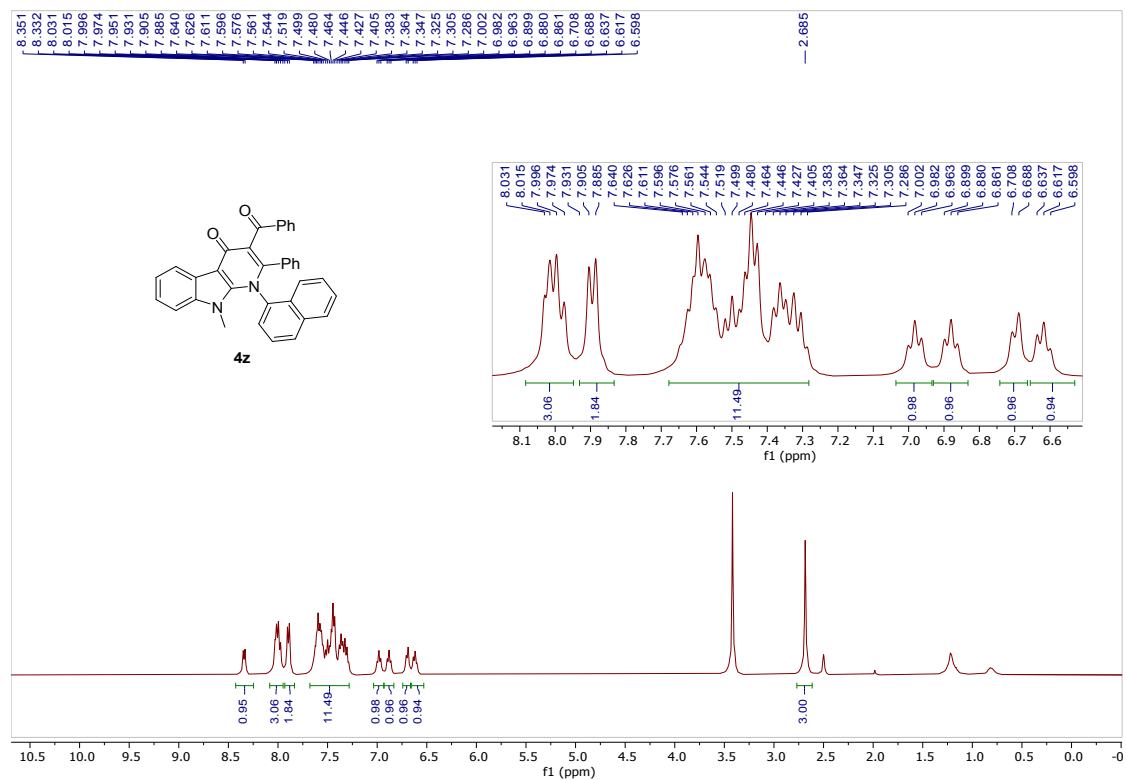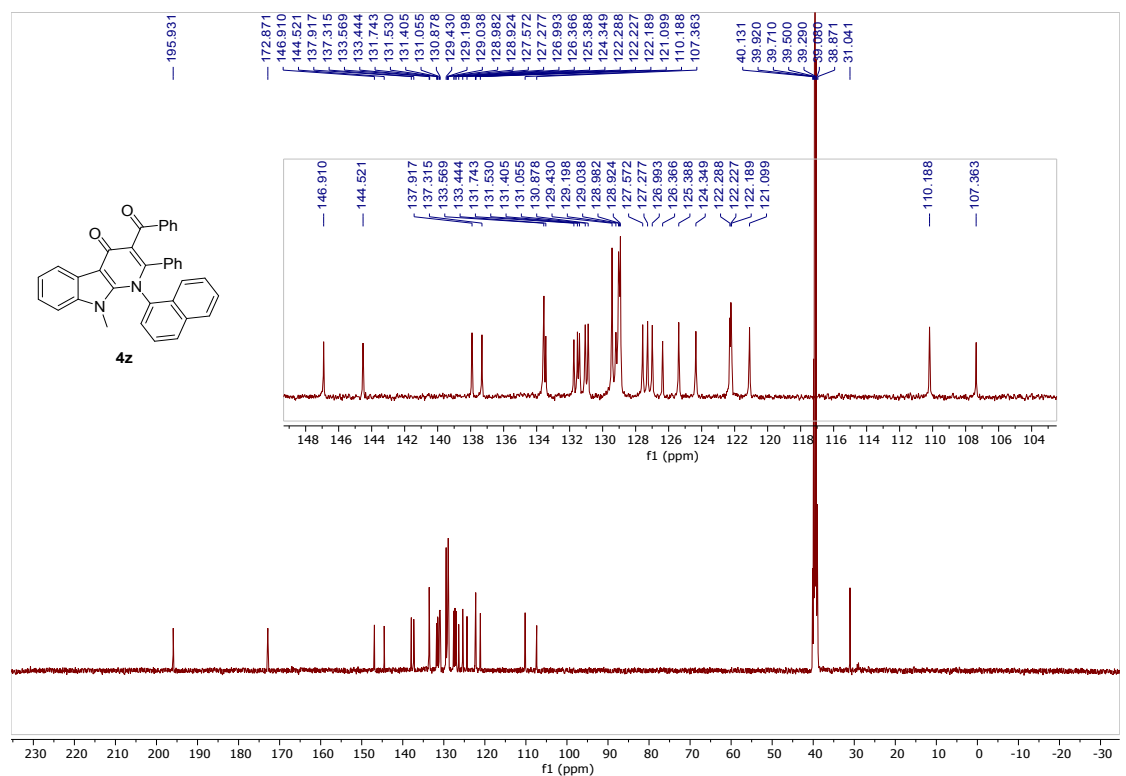



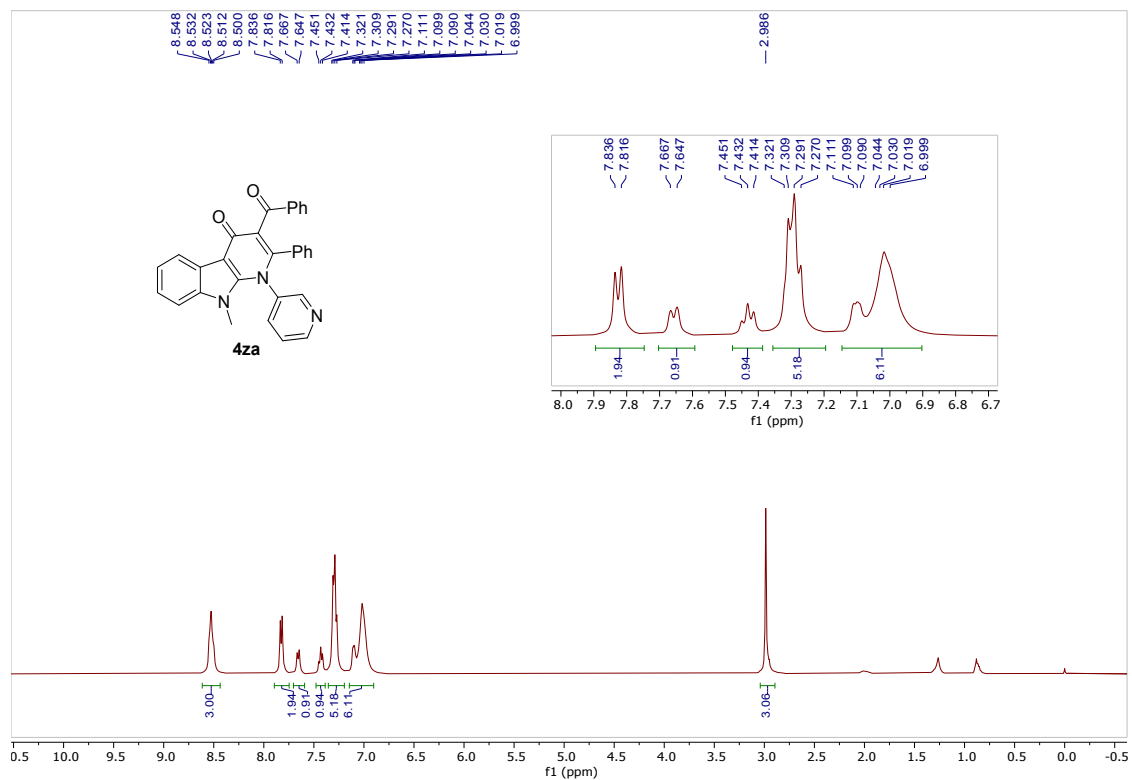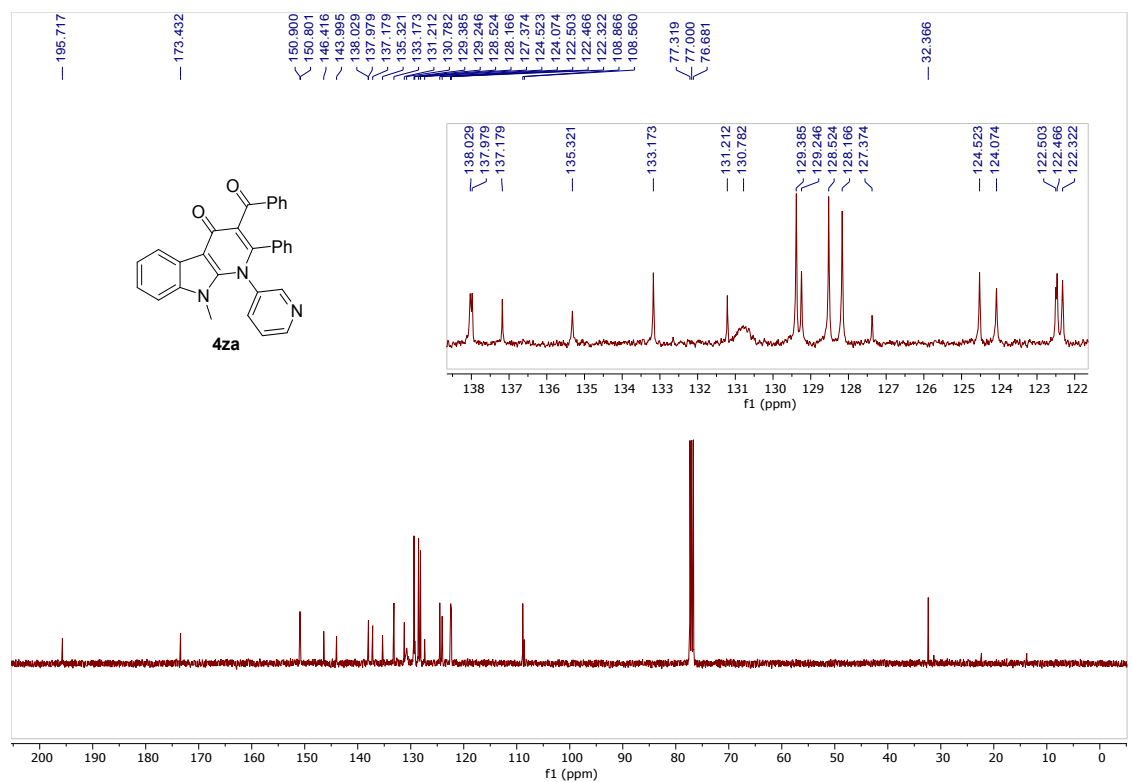

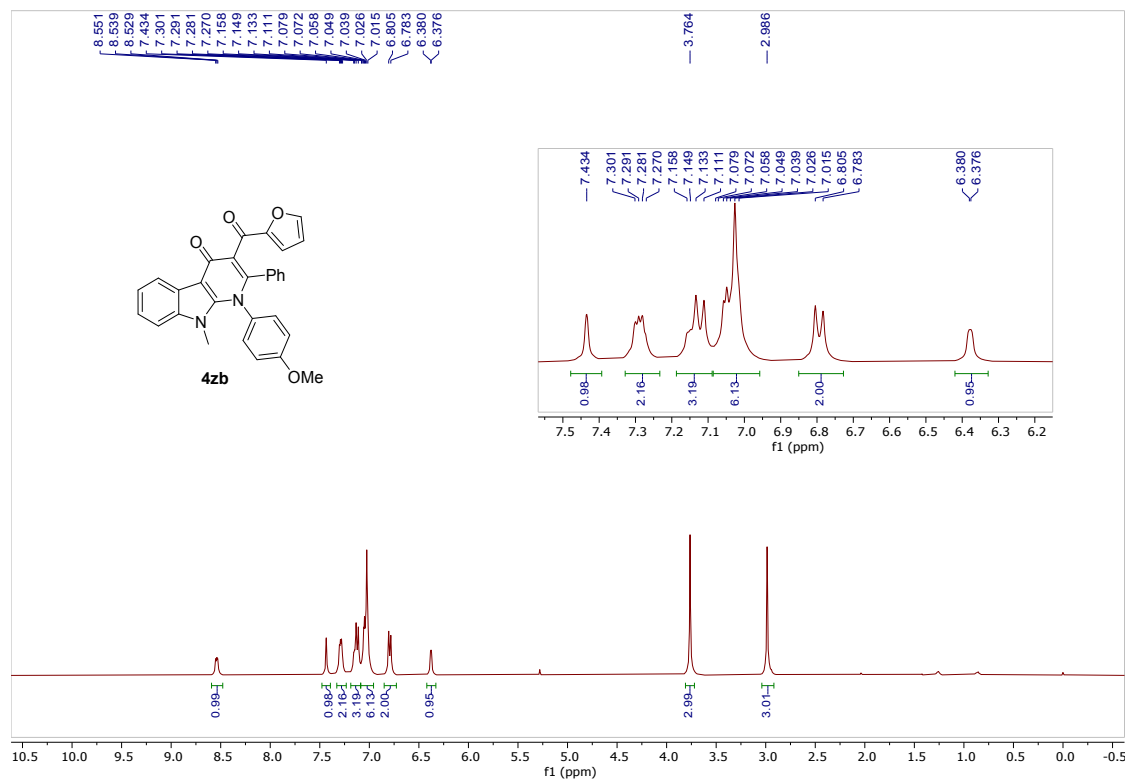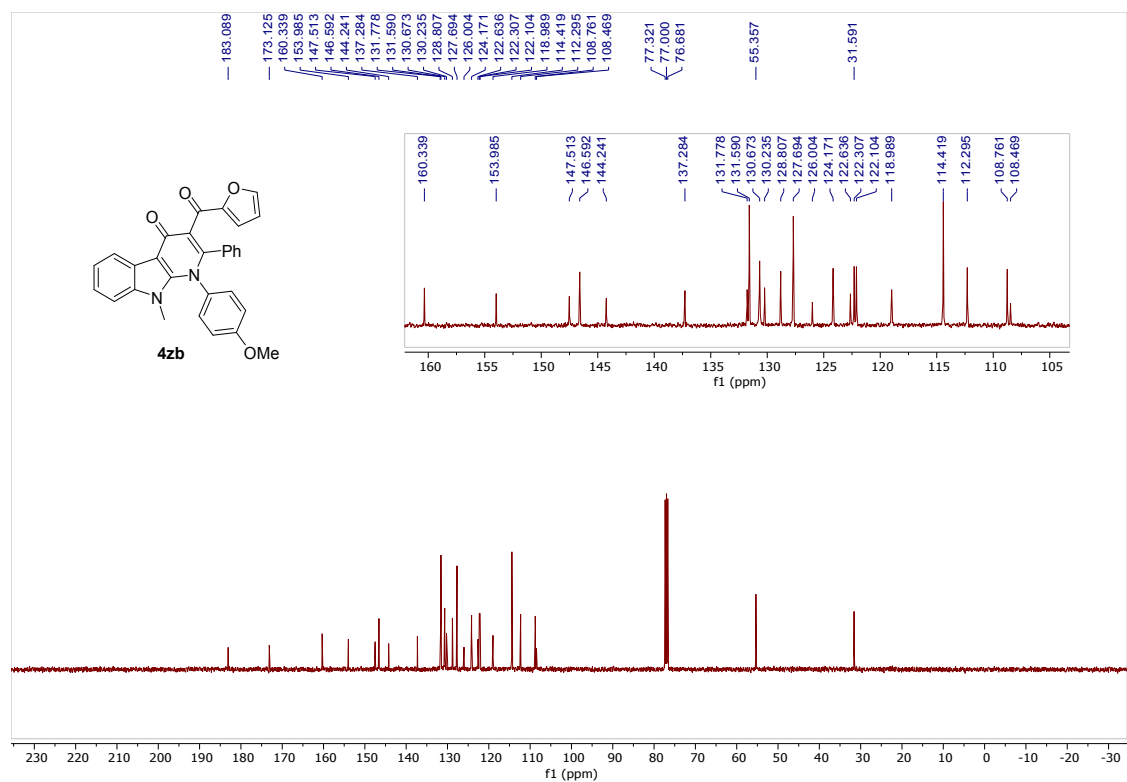

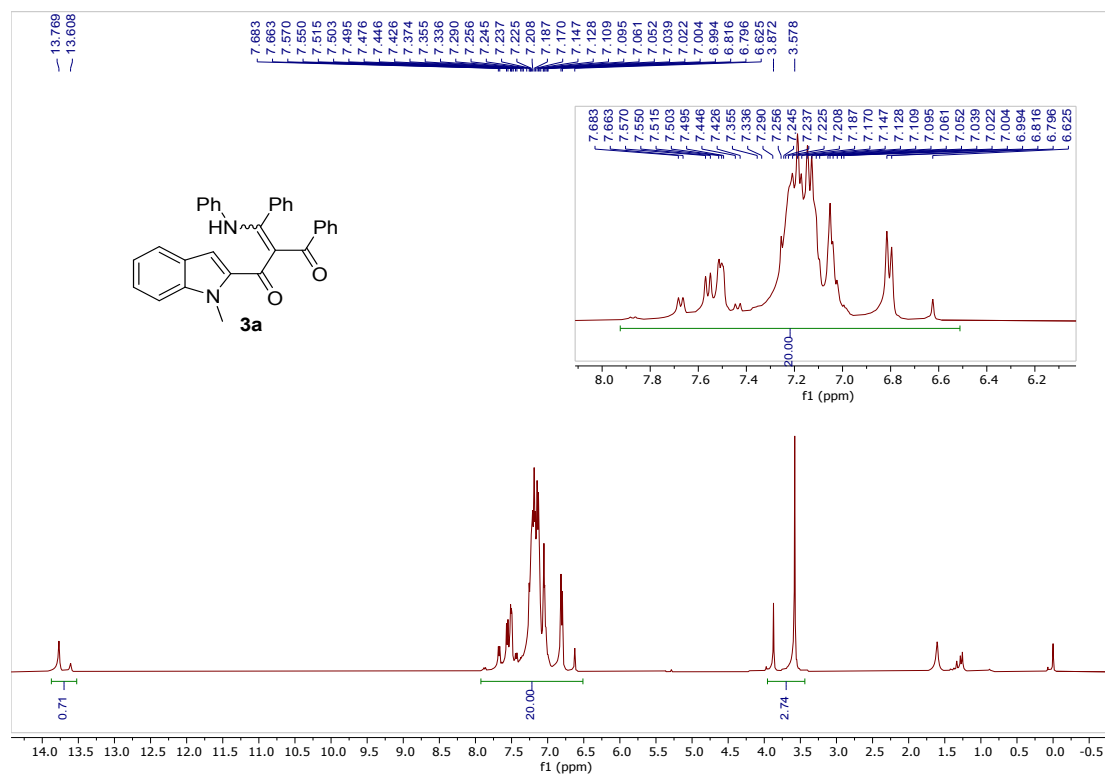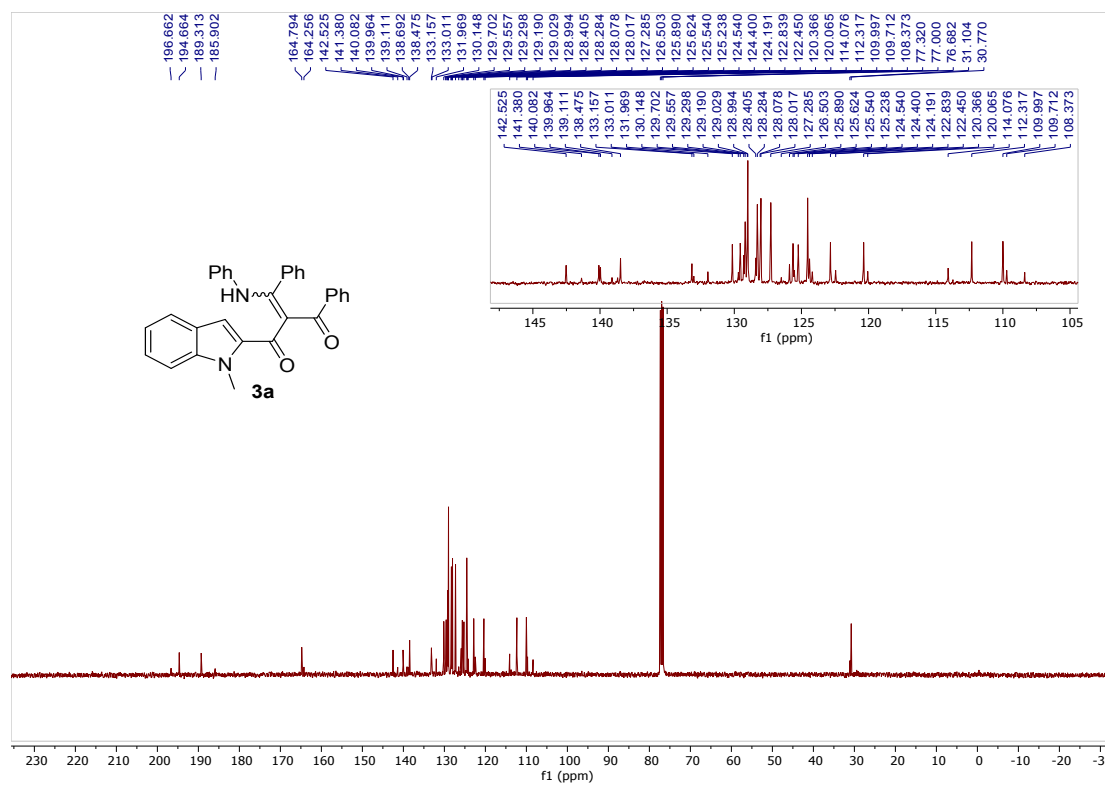

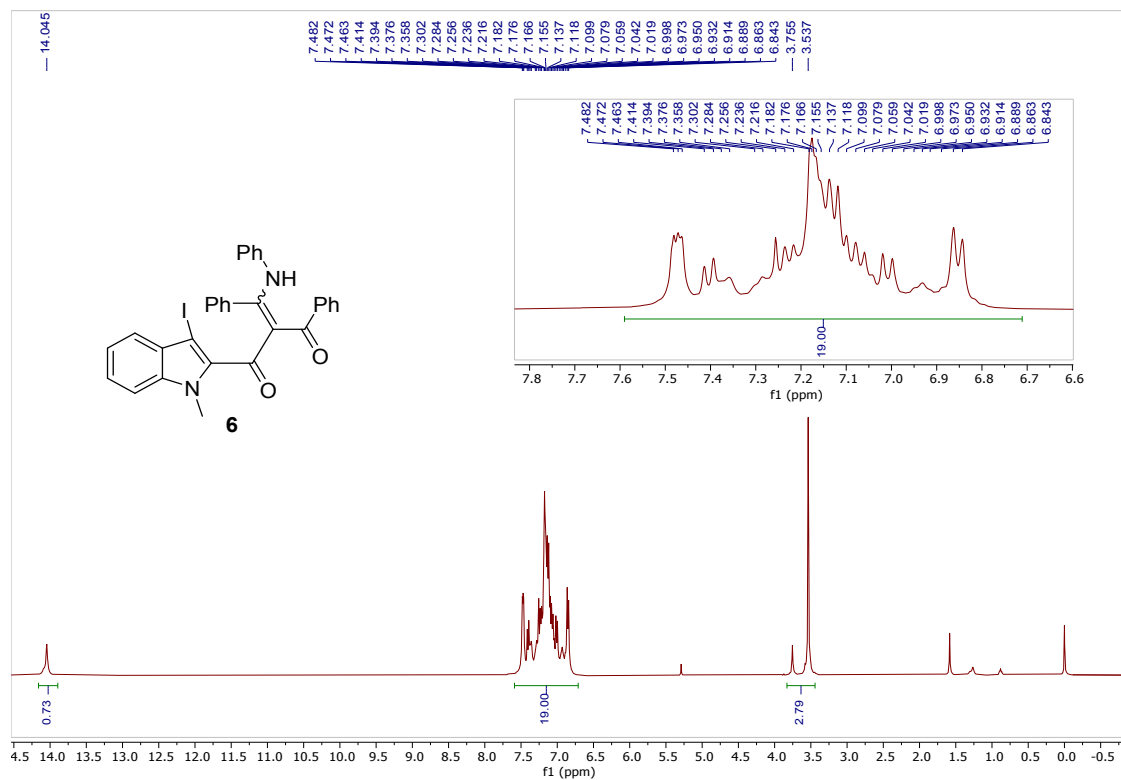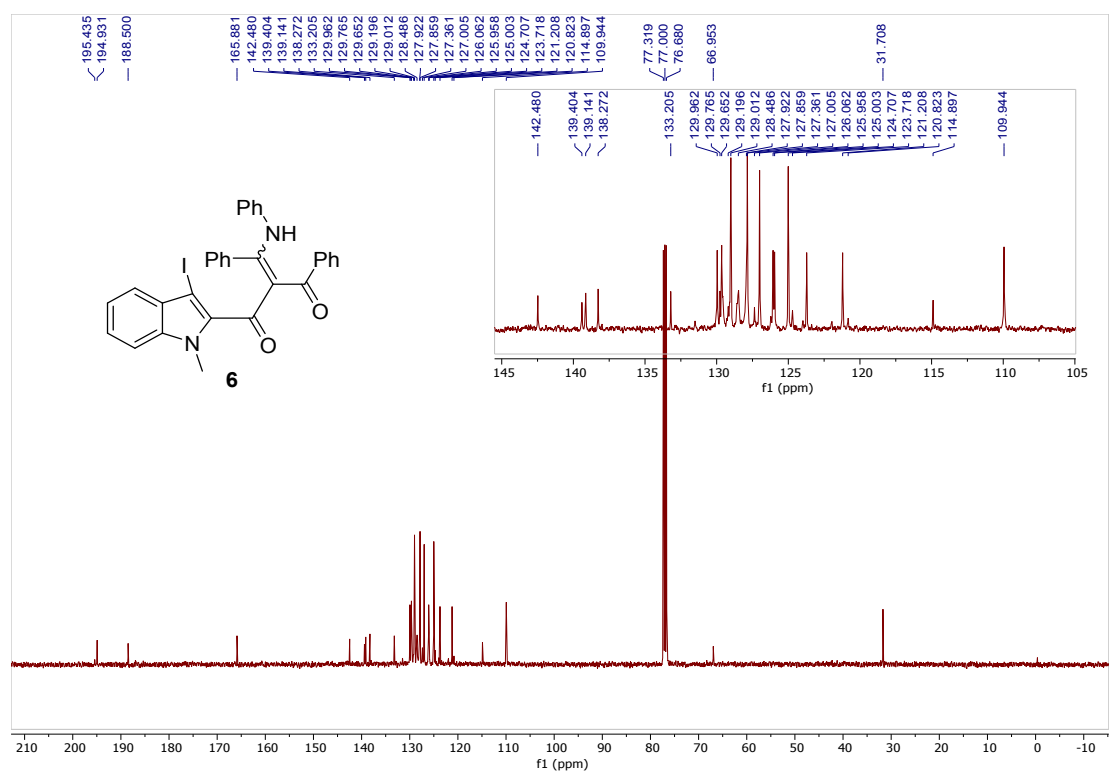

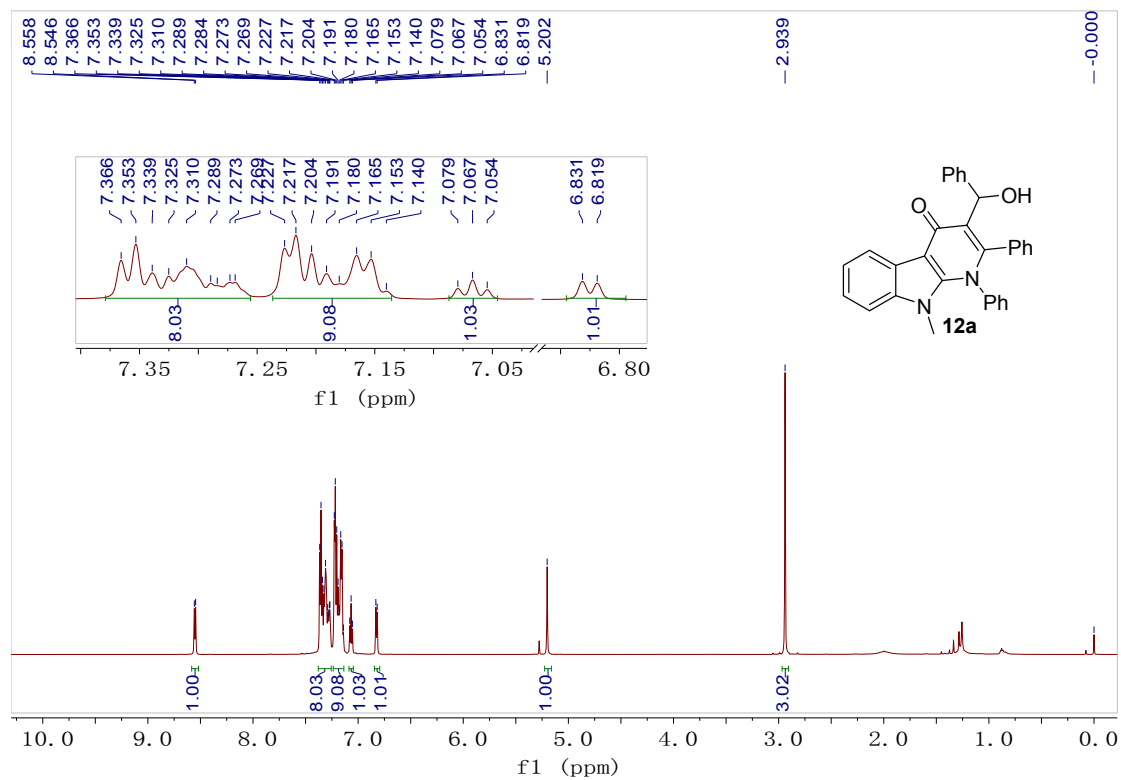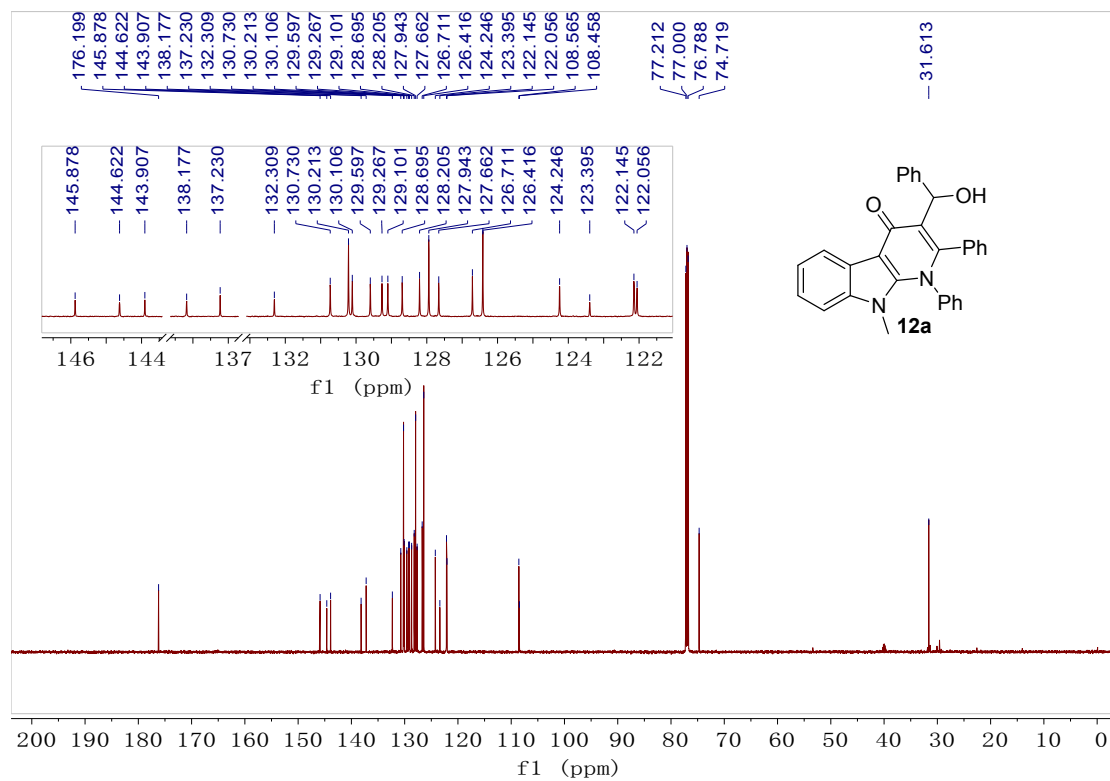

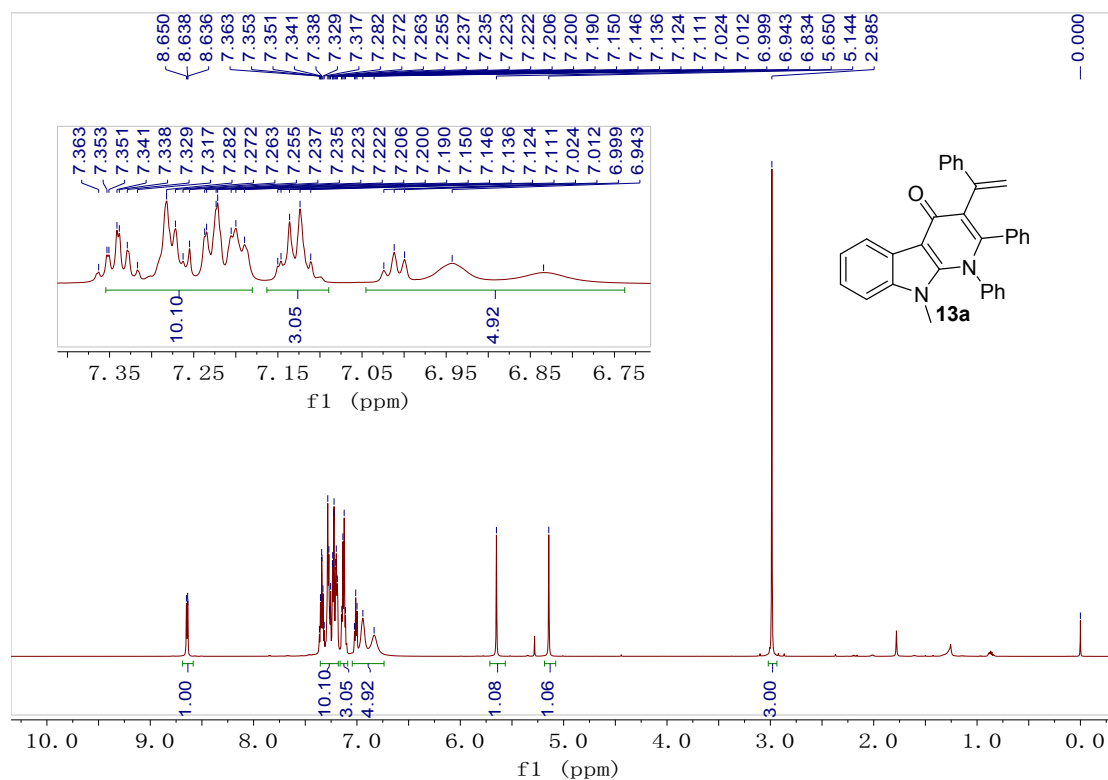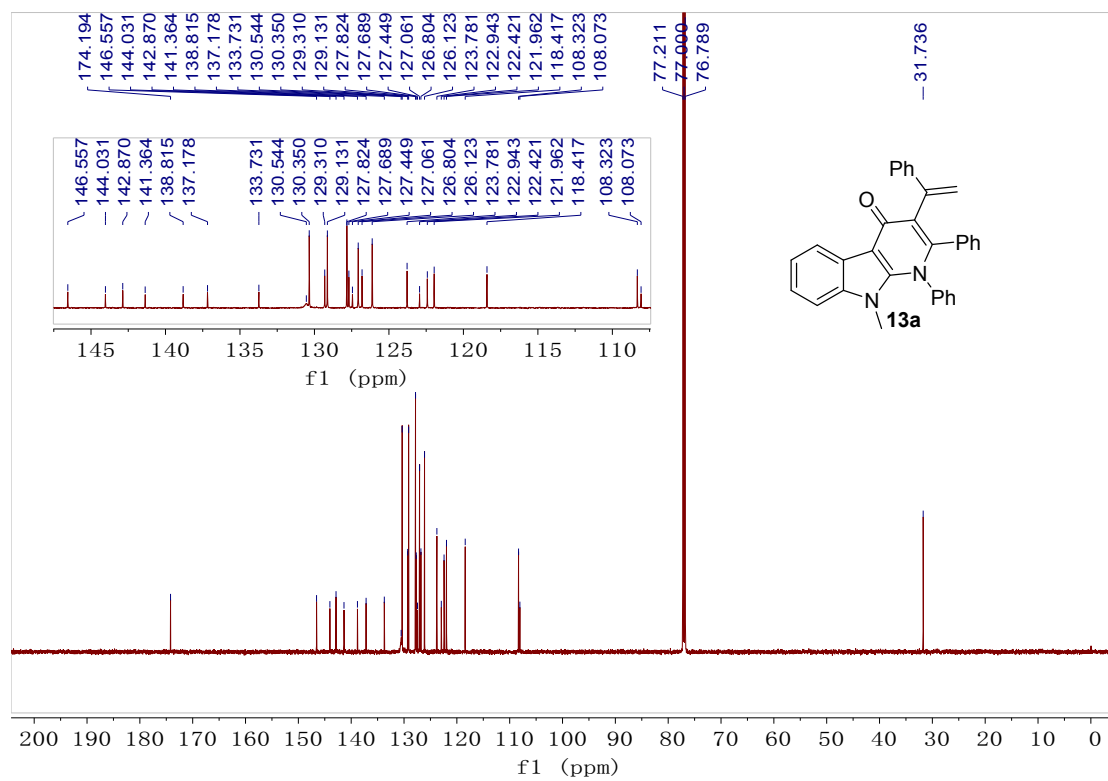

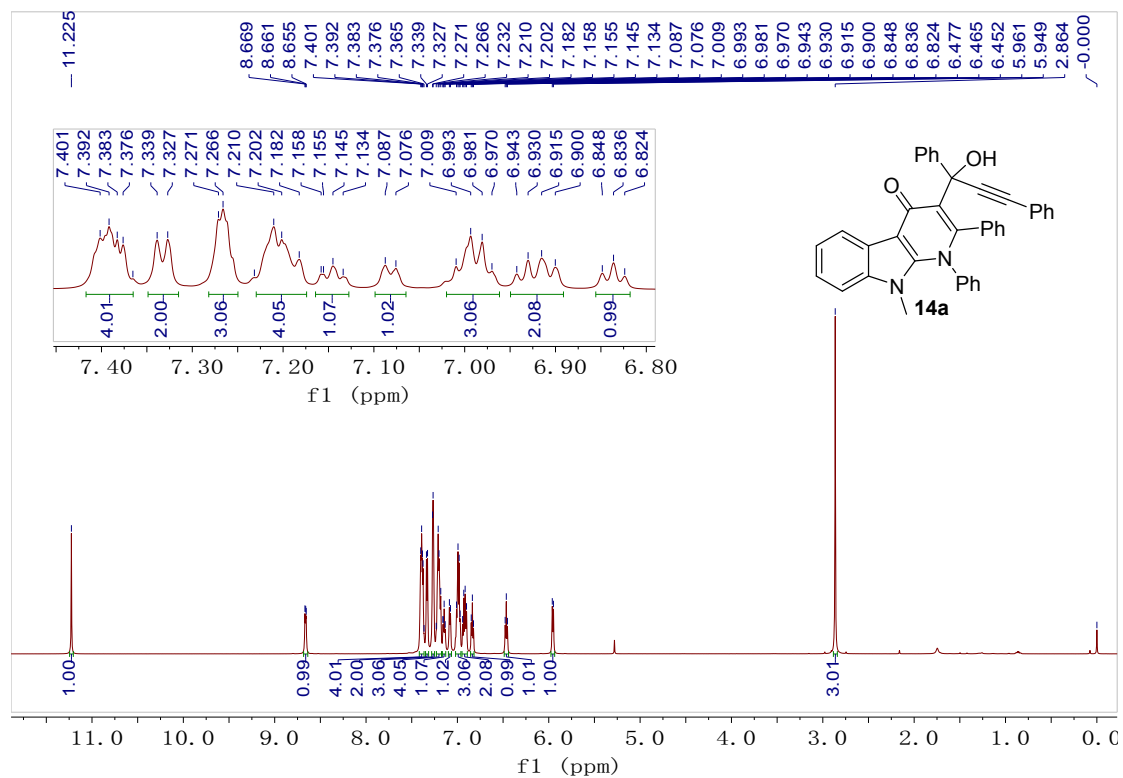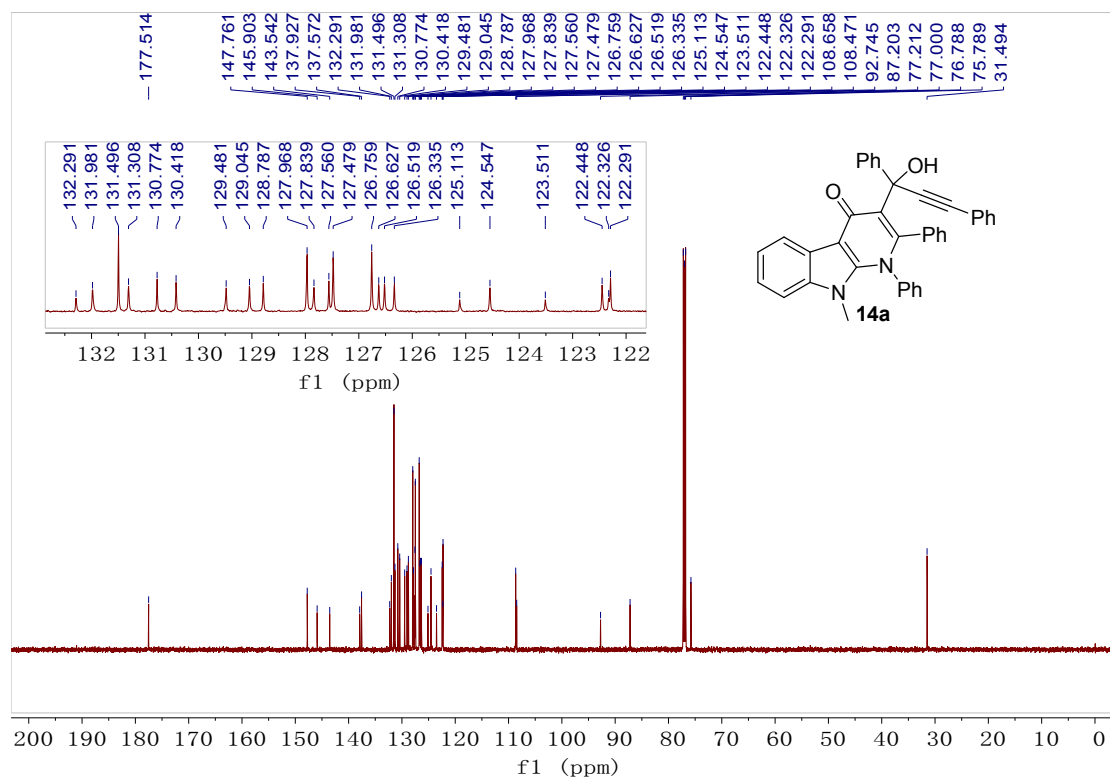

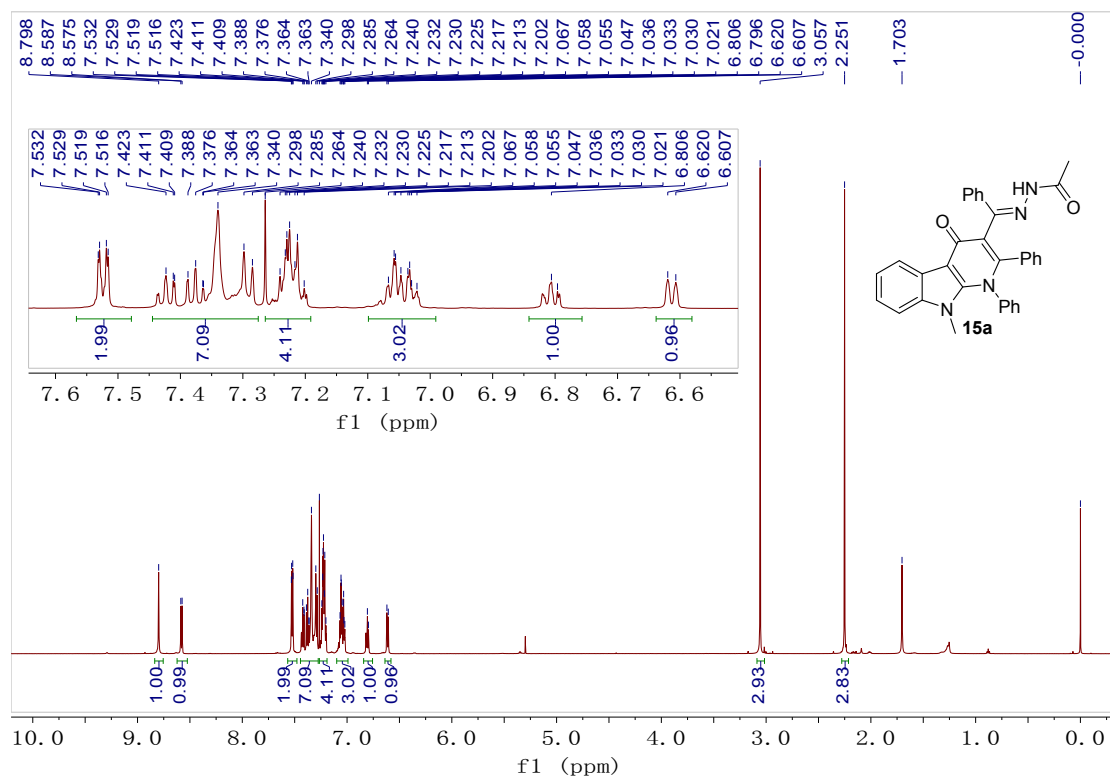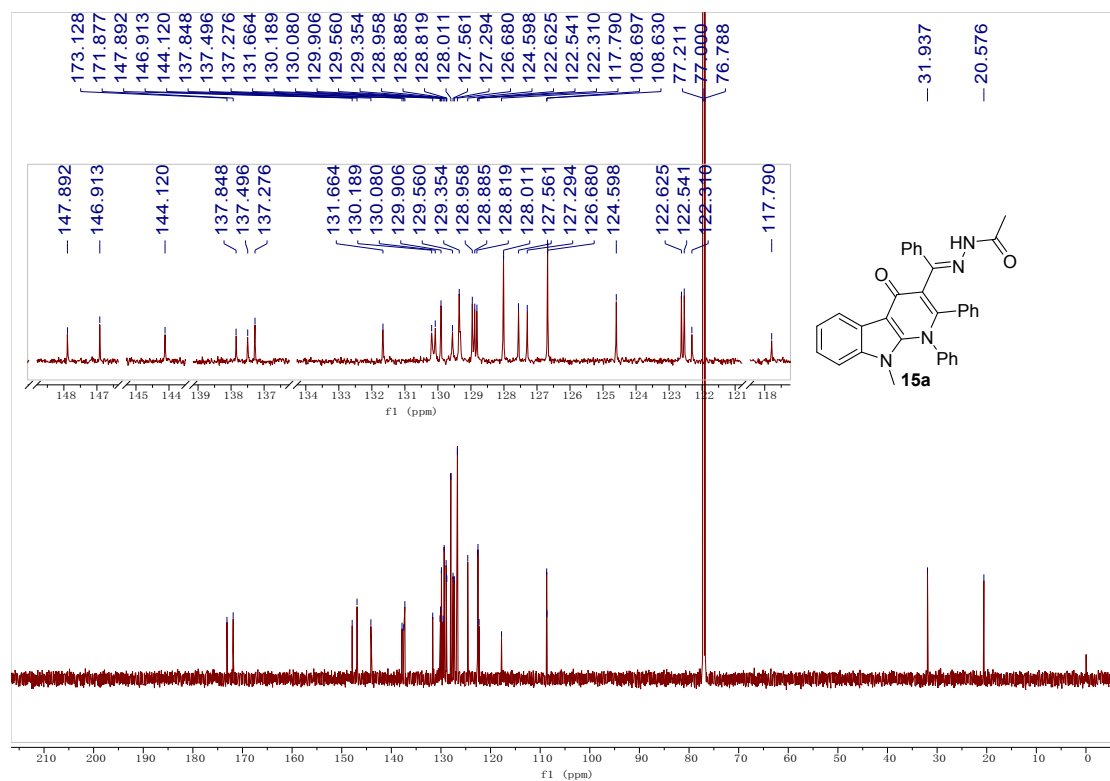



**7. X-ray Crystallography of Compounds 4a, 5a, 6**  
**3-benzoyl-9-methyl-1,2-diphenyl-1,9-dihydro-4H-pyrido[2,3-b]indol-4-one**  
**(4a, CCDC 1905133)**  
**(Ortep ellipsoids are depicted at the 50% level)**

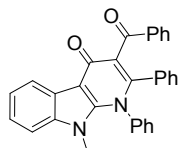

Crystal data and structure refinement for **4a**

|                                   |                                                                                                                  |
|-----------------------------------|------------------------------------------------------------------------------------------------------------------|
| Identification code               | <b>4a</b>                                                                                                        |
| Empirical formula                 | C <sub>31</sub> H <sub>22</sub> N <sub>2</sub> O <sub>2</sub>                                                    |
| Formula weight                    | 454.50                                                                                                           |
| Temperature                       | 296(2) K                                                                                                         |
| Wavelength                        | 0.71073 Å                                                                                                        |
| Crystal system                    | Triclinic                                                                                                        |
| Space group                       | P-1                                                                                                              |
| Unit cell dimensions              | a = 9.937(2) Å    α = 103.522(6)°.<br>b = 11.632(2) Å    β = 107.357(6)°.<br>c = 12.077(2) Å    γ = 108.565(6)°. |
| Volume                            | 1176.8(4) Å <sup>3</sup>                                                                                         |
| Z                                 | 2                                                                                                                |
| Density (calculated)              | 1.283 Mg/m <sup>3</sup>                                                                                          |
| Absorption coefficient            | 0.081 mm <sup>-1</sup>                                                                                           |
| F(000)                            | 476                                                                                                              |
| Crystal size                      | 0.200 x 0.170 x 0.130 mm <sup>3</sup>                                                                            |
| Theta range for data collection   | 2.364 to 25.999°.                                                                                                |
| Index ranges                      | -12 ≤ h ≤ 12, -14 ≤ k ≤ 14, -14 ≤ l ≤ 14                                                                         |
| Reflections collected             | 20851                                                                                                            |
| Independent reflections           | 4594 [R(int) = 0.0434]                                                                                           |
| Completeness to theta = 25.242°   | 99.3 %                                                                                                           |
| Absorption correction             | Semi-empirical from equivalents                                                                                  |
| Max. and min. transmission        | 0.7456 and 0.6319                                                                                                |
| Refinement method                 | Full-matrix least-squares on F <sup>2</sup>                                                                      |
| Data / restraints / parameters    | 4594 / 1 / 318                                                                                                   |
| Goodness-of-fit on F <sup>2</sup> | 1.042                                                                                                            |
| Final R indices [I > 2σ(I)]       | R1 = 0.0444, wR2 = 0.1175                                                                                        |
| R indices (all data)              | R1 = 0.0560, wR2 = 0.1286                                                                                        |
| Extinction coefficient            | 0.068(9)                                                                                                         |
| Largest diff. peak and hole       | 0.205 and -0.155 e.Å <sup>-3</sup>                                                                               |

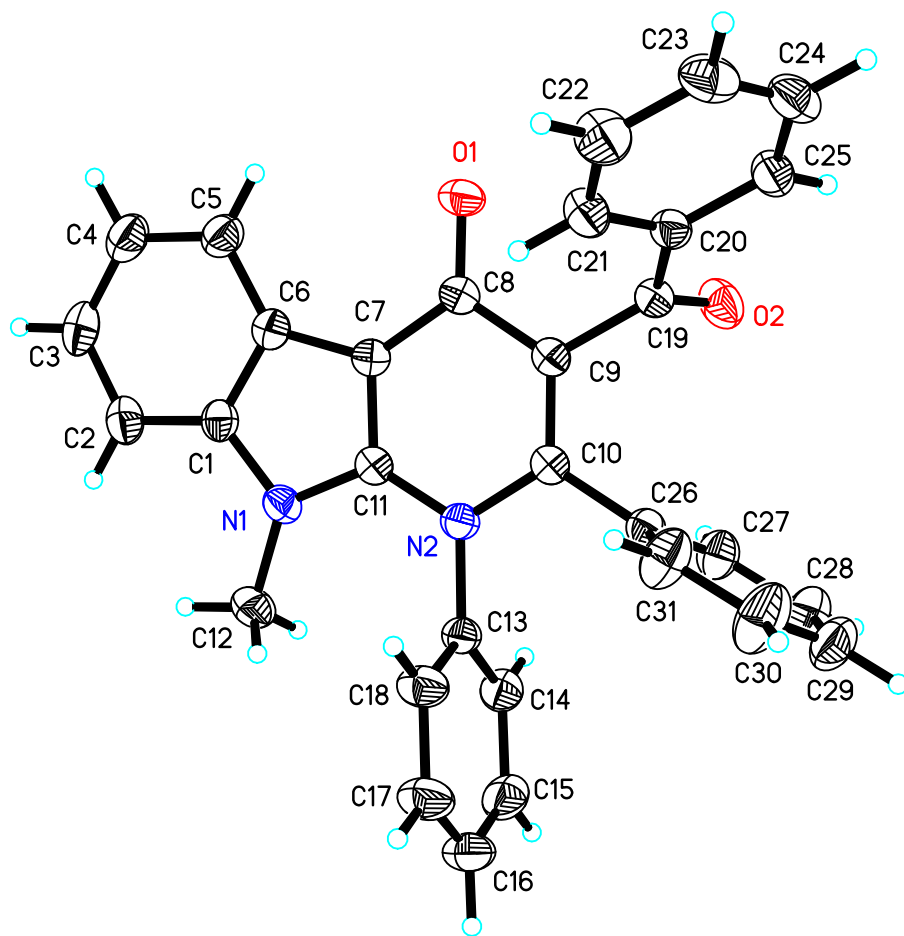

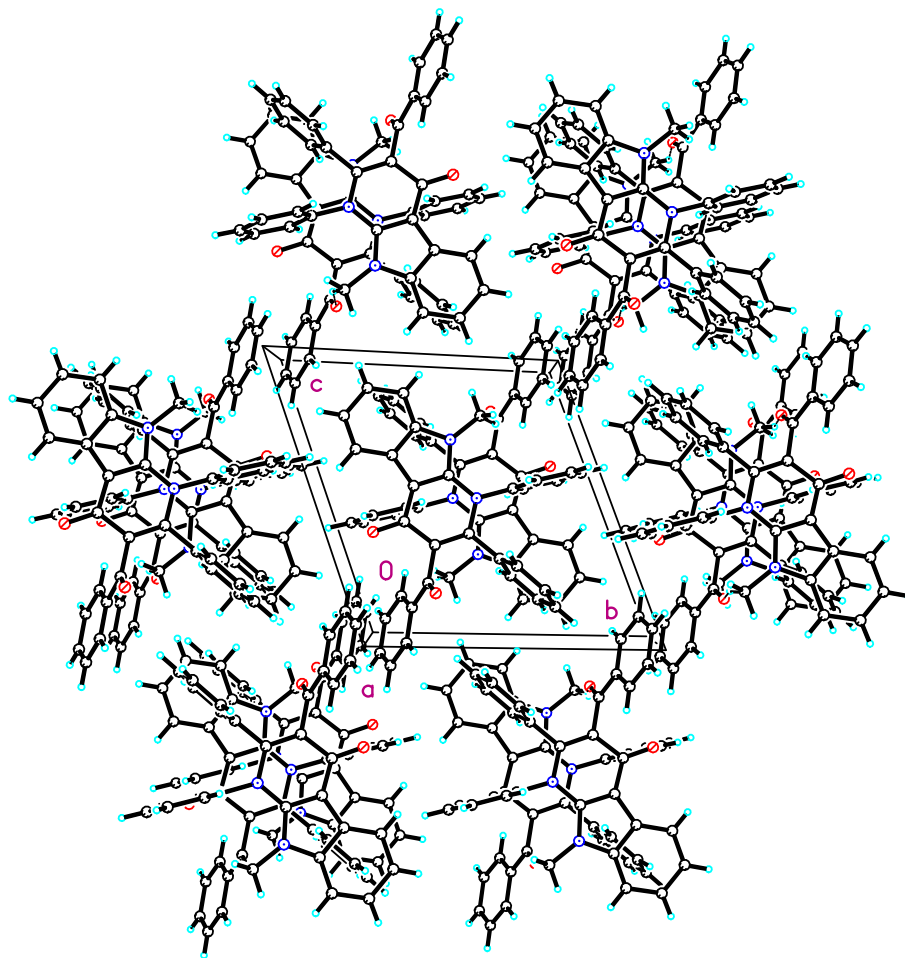

**3-benzoyl-5-methyl-1,2-diphenyl-1,5-dihydro-4H-pyrido[3,2-b]indol-4-one**  
**(5a, CCDC 1905134)**

**(Ortep ellipsoids are depicted at the 50% level)**

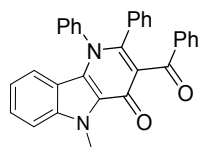

**Crystal data and structure refinement for 5a**

|                                   |                                                                                                               |
|-----------------------------------|---------------------------------------------------------------------------------------------------------------|
| Identification code               | <b>5a</b>                                                                                                     |
| Empirical formula                 | C <sub>31</sub> H <sub>22</sub> N <sub>2</sub> O <sub>2</sub>                                                 |
| Formula weight                    | 454.50                                                                                                        |
| Temperature                       | 296(2) K                                                                                                      |
| Wavelength                        | 0.71073 Å                                                                                                     |
| Crystal system                    | Triclinic                                                                                                     |
| Space group                       | P-1                                                                                                           |
| Unit cell dimensions              | a = 9.8266(3) Å α = 77.5020(10)°.<br>b = 11.0583(3) Å β = 79.6760(10)°.<br>c = 12.1317(4) Å γ = 69.1700(10)°. |
| Volume                            | 1195.36(6) Å <sup>3</sup>                                                                                     |
| Z                                 | 2                                                                                                             |
| Density (calculated)              | 1.263 Mg/m <sup>3</sup>                                                                                       |
| Absorption coefficient            | 0.079mm <sup>-1</sup>                                                                                         |
| F(000)                            | 476                                                                                                           |
| Crystal size                      | 0.200 x 0.160 x 0.110 mm <sup>3</sup>                                                                         |
| Theta range for data collection   | 2.416 to 26.000°.                                                                                             |
| Index ranges                      | -12 ≤ h ≤ 12, -13 ≤ k ≤ 13, -14 ≤ l ≤ 14                                                                      |
| Reflections collected             | 17427                                                                                                         |
| Independent reflections           | 4671 [R(int) = 0.0537]                                                                                        |
| Completeness to theta = 25.242°   | 99.5 %                                                                                                        |
| Absorption correction             | Semi-empirical from equivalents                                                                               |
| Max. and min. transmission        | 0.7456 and 0.6660                                                                                             |
| Refinement method                 | Full-matrix least-squares on F <sup>2</sup>                                                                   |
| Data / restraints / parameters    | 4671 / 0 / 318                                                                                                |
| Goodness-of-fit on F <sup>2</sup> | 1.055                                                                                                         |
| Final R indices [I > 2σ(I)]       | R1 = 0.0627, wR2 = 0.1766                                                                                     |
| R indices (all data)              | R1 = 0.0878, wR2 = 0.2007                                                                                     |
| Extinction coefficient            | 0.036(12)                                                                                                     |
| Largest diff. peak and hole       | 0.236 and -0.237 e.Å <sup>-3</sup>                                                                            |

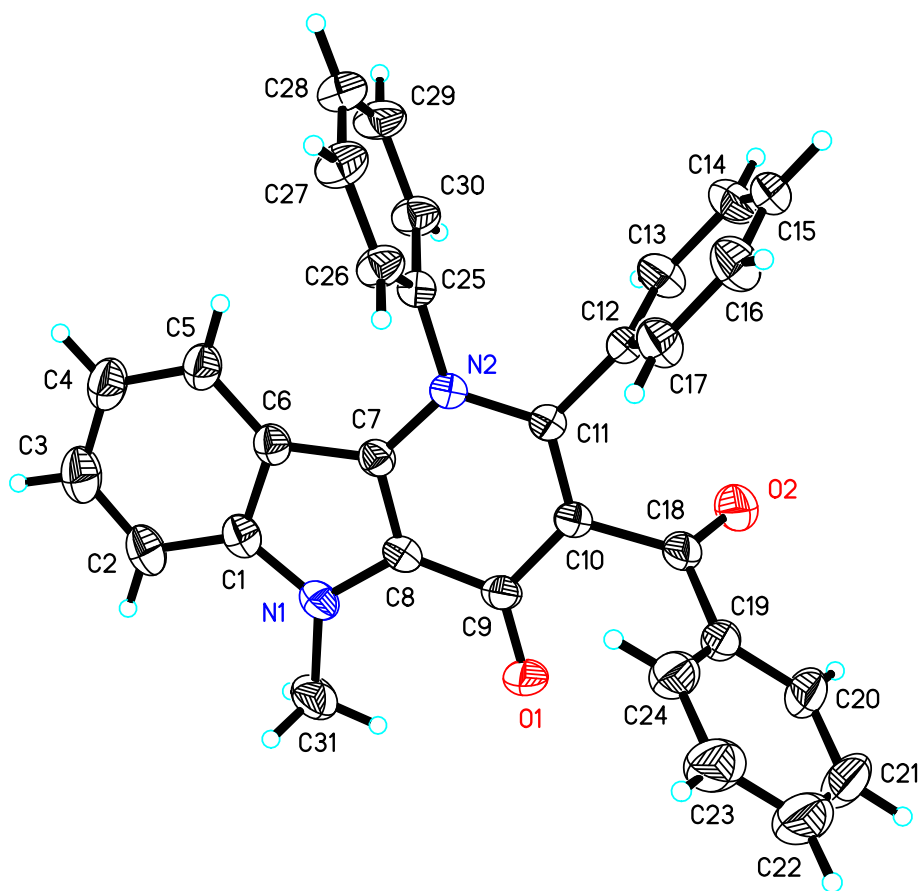

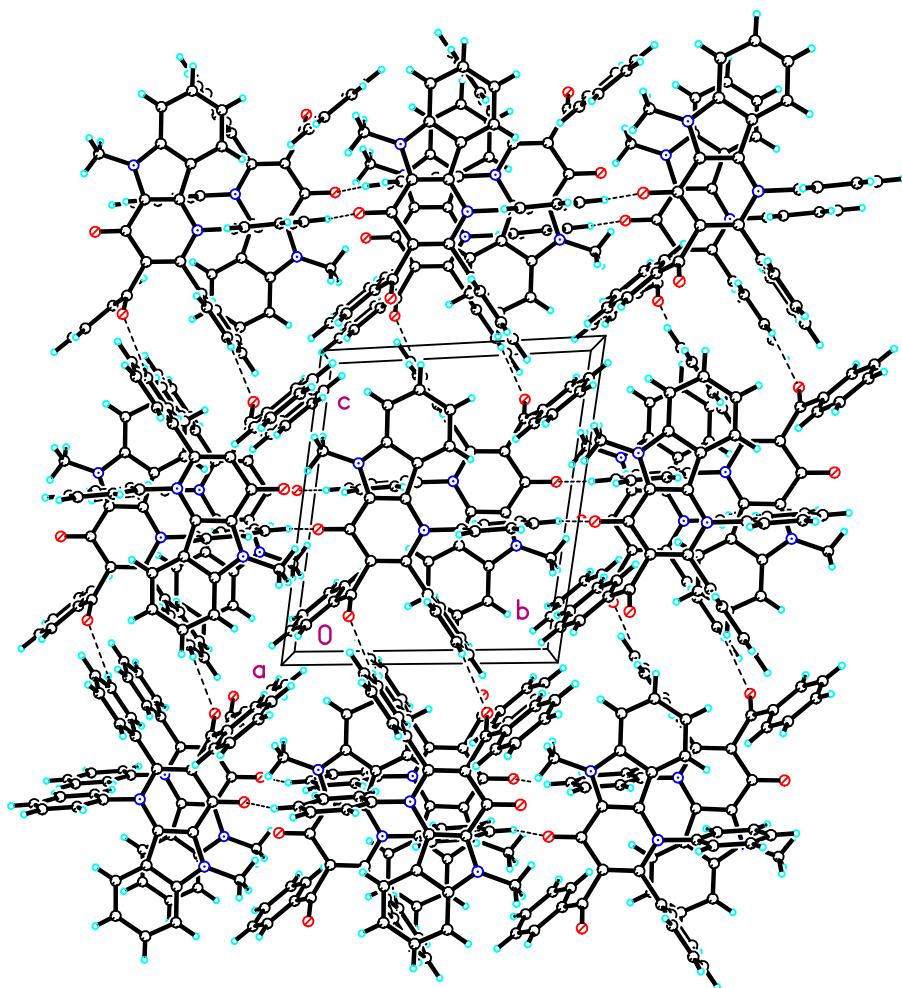

**1-(3-iodo-1-methyl-1H-indol-2-yl)-3-phenyl-2-(phenyl(phenylamino)methylene)propane-1,3-dione (6, CCDC 1916642)**

(Ortep ellipsoids are depicted at the 50% level)

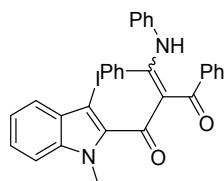

**Crystal data and structure refinement for 6**

|                                   |                                                                                                            |
|-----------------------------------|------------------------------------------------------------------------------------------------------------|
| Identification code               | <b>6</b>                                                                                                   |
| Empirical formula                 | C <sub>31</sub> H <sub>23</sub> IN <sub>2</sub> O <sub>2</sub>                                             |
| Formula weight                    | 582.41                                                                                                     |
| Temperature                       | 293(2) K                                                                                                   |
| Wavelength                        | 0.71073 Å                                                                                                  |
| Crystal system                    | Triclinic                                                                                                  |
| Space group                       | P-1                                                                                                        |
| Unit cell dimensions              | a = 9.1580(5) Å α = 100.582(2)°.<br>b = 11.6088(7) Å β = 108.208(2)°.<br>c = 14.1255(8) Å γ = 106.392(2)°. |
| Volume                            | 1306.25(13) Å <sup>3</sup>                                                                                 |
| Z                                 | 2                                                                                                          |
| Density (calculated)              | 1.481 Mg/m <sup>3</sup>                                                                                    |
| Absorption coefficient            | 1.256 mm <sup>-1</sup>                                                                                     |
| F(000)                            | 584                                                                                                        |
| Crystal size                      | 0.1500.11 x 0.05 mm <sup>3</sup>                                                                           |
| Theta range for data collection   | 2.093 to 25.999°.                                                                                          |
| Index ranges                      | -11 ≤ h ≤ 11, -14 ≤ k ≤ 14, -17 ≤ l ≤ 17                                                                   |
| Reflections collected             | 18716                                                                                                      |
| Independent reflections           | 5130 [R(int) = 0.0550]                                                                                     |
| Completeness to theta = 25.242°   | 99.8 %                                                                                                     |
| Absorption correction             | Semi-empirical from equivalents                                                                            |
| Max. and min. transmission        | 0.7456 and 0.5579                                                                                          |
| Refinement method                 | Full-matrix least-squares on F <sup>2</sup>                                                                |
| Data / restraints / parameters    | 5130 / 0 / 327                                                                                             |
| Goodness-of-fit on F <sup>2</sup> | 1.067                                                                                                      |
| Final R indices [I > 2σ(I)]       | R1 = 0.0487, wR2 = 0.1423                                                                                  |
| R indices (all data)              | R1 = 0.0688, wR2 = 0.1635                                                                                  |
| Largest diff. peak and hole       | 0.649 and -0.768 e.Å <sup>-3</sup>                                                                         |

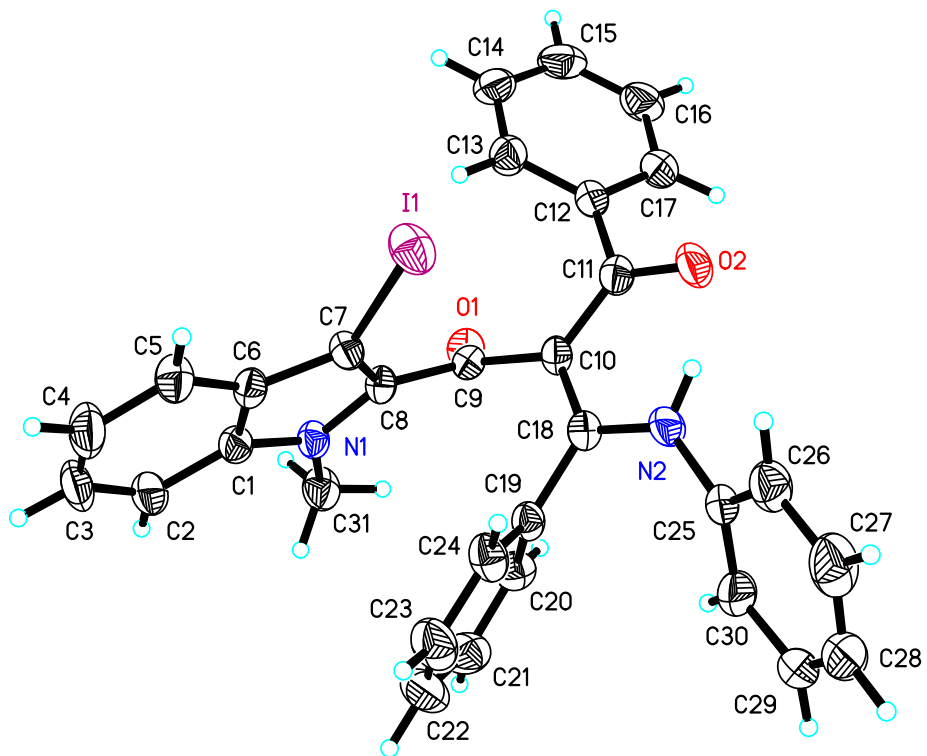



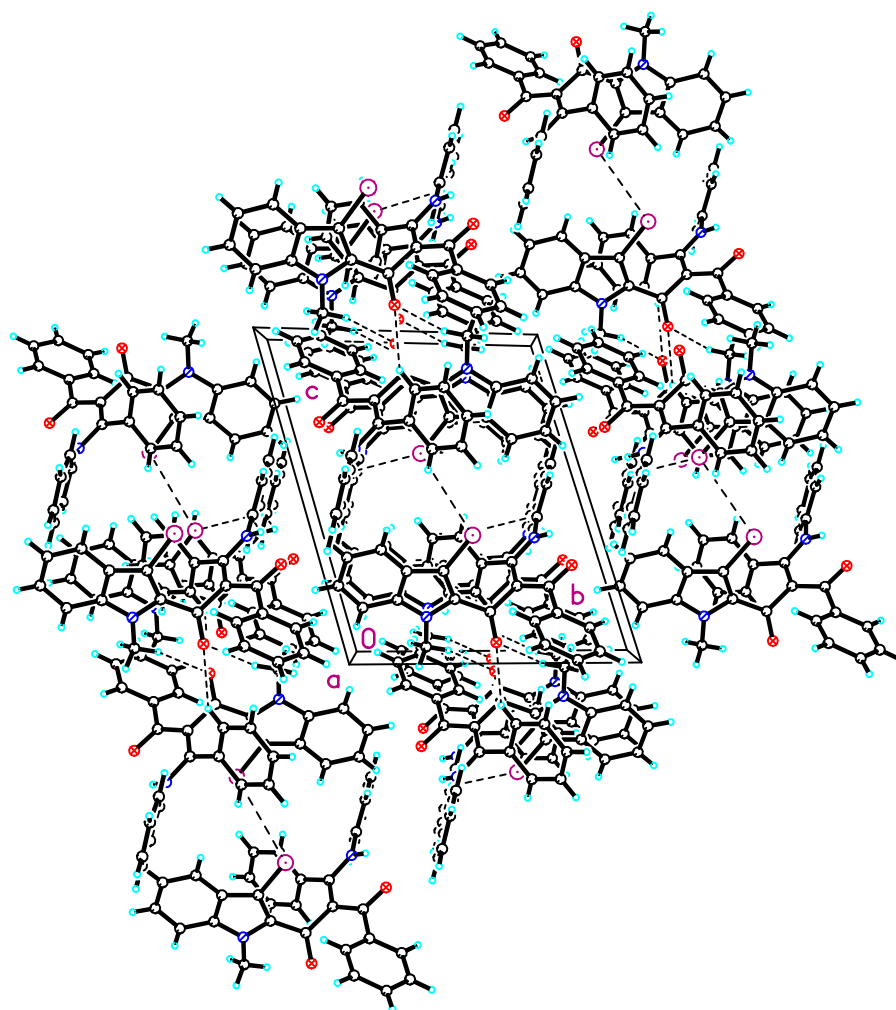

Supplement: d0qo01257b1.pdf [file d0qo01257b1.pdf]
